# Supplementary material for: Introgression of Eastern Chinese and Southern Chinese haplotypes contributes to the improvement of fertility and immunity in European modern pigs
Source: PubMed Central journal article supplement (PMC7059266; doi:10.1093/gigascience/giaa014), 2020-03-06

## Population genomic data reveal origin and phenotypic effect of Chinese haplotypes introgressed into European modern pigs

--Manuscript Draft--

|                                                      |                                                                                                                                                                                                                                                                                                                                                                                                                                                                                                                                                                                                                                                                                                                                                                                                                                                                                                                                                                                                                                                                                                                                                                                                                                                                                      |               |
|------------------------------------------------------|--------------------------------------------------------------------------------------------------------------------------------------------------------------------------------------------------------------------------------------------------------------------------------------------------------------------------------------------------------------------------------------------------------------------------------------------------------------------------------------------------------------------------------------------------------------------------------------------------------------------------------------------------------------------------------------------------------------------------------------------------------------------------------------------------------------------------------------------------------------------------------------------------------------------------------------------------------------------------------------------------------------------------------------------------------------------------------------------------------------------------------------------------------------------------------------------------------------------------------------------------------------------------------------|---------------|
| <b>Manuscript Number:</b>                            | GIGA-D-19-00160                                                                                                                                                                                                                                                                                                                                                                                                                                                                                                                                                                                                                                                                                                                                                                                                                                                                                                                                                                                                                                                                                                                                                                                                                                                                      |               |
| <b>Full Title:</b>                                   | Population genomic data reveal origin and phenotypic effect of Chinese haplotypes introgressed into European modern pigs                                                                                                                                                                                                                                                                                                                                                                                                                                                                                                                                                                                                                                                                                                                                                                                                                                                                                                                                                                                                                                                                                                                                                             |               |
| <b>Article Type:</b>                                 | Research                                                                                                                                                                                                                                                                                                                                                                                                                                                                                                                                                                                                                                                                                                                                                                                                                                                                                                                                                                                                                                                                                                                                                                                                                                                                             |               |
| <b>Funding Information:</b>                          | Natural Science Foundation of China (31525023)                                                                                                                                                                                                                                                                                                                                                                                                                                                                                                                                                                                                                                                                                                                                                                                                                                                                                                                                                                                                                                                                                                                                                                                                                                       | Prof. Jun Ren |
|                                                      | National Key Research Project of China (2016ZX08006-5)                                                                                                                                                                                                                                                                                                                                                                                                                                                                                                                                                                                                                                                                                                                                                                                                                                                                                                                                                                                                                                                                                                                                                                                                                               | Prof. Jun Ren |
| <b>Abstract:</b>                                     | <p>Pigs were domesticated independently from European and Asian wild boars nearly 10,000 years ago. Chinese indigenous pigs were historically introduced to improve Europe local pigs. However, the geographic origin and biological functions of introgressed Chinese genes in modern European pig breeds remain largely unknown. Here we explored whole-genome sequencing data from 266 Eurasian wild boars and domestic pigs to produce a fine-scale map of introgression between French Large White (FLW) and Chinese pigs. We show that FLW pigs had historical admixture with both South Chinese (SCN) and East Chinese (ECN) pigs 200–300 years ago. A set of SCN haplotypes are beneficial for improving disease resistance and those of ECN haplotypes are favorable for better reproductive performance in FLW pigs. Intriguingly, we found both human mediated and archaic introgression events at the AHR locus, at which the archaic haplotype contribute to increased fertility in both ECN and FLW pigs. This study advances our understanding of the development history of global domestic pigs and highlights the importance of artificial hybridization and natural archaic introgression in the formation of phenotypic characteristics in domestic animals.</p> |               |
| <b>Corresponding Author:</b>                         | Jun Ren<br><br>CHINA                                                                                                                                                                                                                                                                                                                                                                                                                                                                                                                                                                                                                                                                                                                                                                                                                                                                                                                                                                                                                                                                                                                                                                                                                                                                 |               |
| <b>Corresponding Author Secondary Information:</b>   |                                                                                                                                                                                                                                                                                                                                                                                                                                                                                                                                                                                                                                                                                                                                                                                                                                                                                                                                                                                                                                                                                                                                                                                                                                                                                      |               |
| <b>Corresponding Author's Institution:</b>           |                                                                                                                                                                                                                                                                                                                                                                                                                                                                                                                                                                                                                                                                                                                                                                                                                                                                                                                                                                                                                                                                                                                                                                                                                                                                                      |               |
| <b>Corresponding Author's Secondary Institution:</b> |                                                                                                                                                                                                                                                                                                                                                                                                                                                                                                                                                                                                                                                                                                                                                                                                                                                                                                                                                                                                                                                                                                                                                                                                                                                                                      |               |
| <b>First Author:</b>                                 | Hao Chen                                                                                                                                                                                                                                                                                                                                                                                                                                                                                                                                                                                                                                                                                                                                                                                                                                                                                                                                                                                                                                                                                                                                                                                                                                                                             |               |
| <b>First Author Secondary Information:</b>           |                                                                                                                                                                                                                                                                                                                                                                                                                                                                                                                                                                                                                                                                                                                                                                                                                                                                                                                                                                                                                                                                                                                                                                                                                                                                                      |               |
| <b>Order of Authors:</b>                             | Hao Chen<br>Min Huang<br>Bin Yang<br>Zhongping Wu<br>Zheng Deng<br>Yong Hou<br>Jun Ren<br>Lusheng Huang                                                                                                                                                                                                                                                                                                                                                                                                                                                                                                                                                                                                                                                                                                                                                                                                                                                                                                                                                                                                                                                                                                                                                                              |               |
| <b>Order of Authors Secondary Information:</b>       |                                                                                                                                                                                                                                                                                                                                                                                                                                                                                                                                                                                                                                                                                                                                                                                                                                                                                                                                                                                                                                                                                                                                                                                                                                                                                      |               |
| <b>Additional Information:</b>                       |                                                                                                                                                                                                                                                                                                                                                                                                                                                                                                                                                                                                                                                                                                                                                                                                                                                                                                                                                                                                                                                                                                                                                                                                                                                                                      |               |
| <b>Question</b>                                      | <b>Response</b>                                                                                                                                                                                                                                                                                                                                                                                                                                                                                                                                                                                                                                                                                                                                                                                                                                                                                                                                                                                                                                                                                                                                                                                                                                                                      |               |

|                                                                                                                                                                                                                                                                                                                                                                                                                                                                                                                                     |            |
|-------------------------------------------------------------------------------------------------------------------------------------------------------------------------------------------------------------------------------------------------------------------------------------------------------------------------------------------------------------------------------------------------------------------------------------------------------------------------------------------------------------------------------------|------------|
| <p>Are you submitting this manuscript to a special series or article collection?</p>                                                                                                                                                                                                                                                                                                                                                                                                                                                | <p>No</p>  |
| <p><b>Experimental design and statistics</b></p> <p>Full details of the experimental design and statistical methods used should be given in the Methods section, as detailed in our <a href="#">Minimum Standards Reporting Checklist</a>. Information essential to interpreting the data presented should be made available in the figure legends.</p> <p>Have you included all the information requested in your manuscript?</p>                                                                                                  | <p>Yes</p> |
| <p><b>Resources</b></p> <p>A description of all resources used, including antibodies, cell lines, animals and software tools, with enough information to allow them to be uniquely identified, should be included in the Methods section. Authors are strongly encouraged to cite <a href="#">Research Resource Identifiers</a> (RRIDs) for antibodies, model organisms and tools, where possible.</p> <p>Have you included the information requested as detailed in our <a href="#">Minimum Standards Reporting Checklist</a>?</p> | <p>Yes</p> |
| <p><b>Availability of data and materials</b></p> <p>All datasets and code on which the conclusions of the paper rely must be either included in your submission or deposited in <a href="#">publicly available repositories</a> (where available and ethically appropriate), referencing such data using a unique identifier in the references and in the “Availability of Data and Materials” section of your manuscript.</p> <p>Have you have met the above requirement as detailed in our <a href="#">Minimum</a></p>            | <p>No</p>  |

[Standards Reporting Checklist?](#)

If not, please give reasons for any omissions below.

as follow-up to "**Availability of data and materials**

All datasets and code on which the conclusions of the paper rely must be either included in your submission or deposited in [publicly available repositories](#) (where available and ethically appropriate), referencing such data using a unique identifier in the references and in the "Availability of Data and Materials" section of your manuscript.

Have you have met the above requirement as detailed in our [Minimum Standards Reporting Checklist?](#)

"

All sequence data will be submitted to a publicly available repositories when this manuscript is acceptable for publication in GigaScience.

1 **Population genomic data reveal origin and phenotypic effect of Chinese**  
2 **haplotypes introgressed into European modern pigs**

3

4 Hao Chen<sup>§</sup>, Min Huang<sup>§</sup>, Bin Yang, Zhongping Wu, Zheng Deng, Yong Hou, Jun Ren<sup>\*†</sup>,  
5 Lusheng Huang<sup>\*</sup>

6

7 State Key Laboratory of Pig Genetic Improvement and Production Technology, Jiangxi  
8 Agricultural University, Nanchang, P.R. China.

9

10 <sup>§</sup> Both authors contributed equally to this study and should be considered co-first authors

11

12 <sup>†</sup>Current address: College of Animal Science, South China Agricultural University, 510642,  
13 Guangzhou, P.R. China

14

15 **Correspondence author:** Jun Ren, Lusheng Huang

16 State Key Laboratory of Pig Genetic Improvement and Production Technology

17 Jiangxi Agricultural University

18 Nanchang 330045, P. R. China.

19 Phone: 0086-791-83805967; Fax: 0086-791-83900189;

20 E-mail: renjunxau@hotmail.com; lushenghuang@hotmail.com

21 **Abstract**

22 Pigs were domesticated independently from European and Asian wild boars nearly 10,000  
23 years ago. Chinese indigenous pigs were historically introduced to improve Europe local pigs.  
24 However, the geographic origin and biological functions of introgressed Chinese genes in  
25 modern European pig breeds remain largely unknown. Here we explored whole-genome  
26 sequencing data from 266 Eurasian wild boars and domestic pigs to produce a fine-scale map  
27 of introgression between French Large White (FLW) and Chinese pigs. We show that FLW  
28 pigs had historical admixture with both South Chinese (SCN) and East Chinese (ECN) pigs  
29 200–300 years ago. A set of SCN haplotypes are beneficial for improving disease resistance  
30 and those of ECN haplotypes are favorable for better reproductive performance in FLW pigs.  
31 Intriguingly, we found both human mediated and archaic introgression events at the *AHR*  
32 locus, at which the archaic haplotype contribute to increased fertility in both ECN and FLW  
33 pigs. This study advances our understanding of the development history of global domestic  
34 pigs and highlights the importance of artificial hybridization and natural archaic introgression  
35 in the formation of phenotypic characteristics in domestic animals.

## 36 **Introduction**

37 Integrated genomic and archaeological evidence have illuminated that wild boar (*Sus scrofa*)  
38 originated from the Islands of Southeast Asia about 5 million years ago and then dispersed  
39 throughout Eurasia. Approximately 1 million years ago, geographic isolation caused by  
40 glacial events hampered the continuous gene flow among Eurasian wild boars, causing  
41 European and Asian wild boars to differentiate from each other [1-4]. About 10,000 years  
42 ago, European and Asian wild boars were domesticated independently in the Near East and  
43 China, respectively [3, 5, 6]. After long-term artificial selection and natural selection,  
44 abundant genetic resources of domestic pigs appeared in China, accounting for about  
45 one-third of global breeds [7, 8]. Chinese pigs are distributed in diverse geographic regions  
46 and have different breed features. For example, Erhualian (EHL) and Meishan pigs in East  
47 China are known for their prolificacy, with a litter size of more than 15, and for their thick  
48 skin. Luchuan (LUC) and Bama pigs in South China have inferior reproductive performance  
49 (8–10 piglets per parity) and have thin skin and excellent heat resistance [7]. These pig  
50 breeds not only play a critical role in the Chinese pig industry but also have contributed to the  
51 development of international commercial breeds, such as the Large White (LW) [9, 10].

52 Over hundreds of years, Chinese pigs were introduced to Europe, mainly during three  
53 historical periods [7]. From 1685 to 1757, the Qing Dynasty set up four foreign trade ports:  
54 two in East China (Shanghai and Ningbo) and two (Zhangzhou and Guangzhou) in South  
55 China. Europe (especially England) had frequent trade with China through the four ports  
56 mainly via the East India Company. This raises the possibility that East Chinese (ECN) and  
57 South Chinese (SCN) pigs may have been transported to European countries during this  
58 period. From 1757 to 1841, only the Guangzhou port in South China was permitted for  
59 foreign trade, and a ban was imposed on maritime trade or intercourse with foreign countries  
60 in 1757. It is well documented that SCN pigs had been introduced to England for the

61 hybridization of local pigs during this period, contributing to the formation of Berkshire [9]  
62 and LW pigs [10]. In 1978, the Chinese government launched the reform and open-door  
63 policy. Since then, ECN pigs, including Meishan, Jinhua, and Jiaying Black, have been  
64 introduced into France, America, and Japan for the development of prolific synthetic lines  
65 [7].

66 Recently, whole-genome re-sequencing analysis confirmed the human-mediated  
67 translocation of Chinese pigs into Europe, which provided genetic variations for the selective  
68 breeding of modern commercial LW pigs [11]. However, it remains unknown if SCN or ECN  
69 pigs or both were introduced to Europe, because previous studies used a limited number of  
70 Chinese pigs from different locations as a whole population. French Large White (FLW) pigs  
71 are known for their excellent reproductive performance. A remarkable genetic improvement  
72 of litter size has been witnessed in FLW pigs over the past decades, but the molecular  
73 mechanisms underlying the fecundity remain unclear, although the fecundity is speculated to  
74 be related to the recent introgression of highly prolific Chinese pigs such as ECN pigs [7].  
75 Further studies are required to test this speculation.

76 In this study, we explored whole-genome sequencing data of 266 Eurasian pigs to show  
77 that both SCN and ECN haplotypes were introgressed into LW pigs ~200-300 years ago.  
78 Some of the introgressed haplotypes have been under preferential selection to improve  
79 fertility and immunity in FLW pigs. Interestingly, the prolificacy-associated *AHR* haplotype  
80 was likely introgressed from an archaic *Sus* population into ECN pigs via interspecies  
81 hybridization and was then introduced from ECN pigs into FLW pigs through human-driven  
82 transportation. These findings advance our understanding of the development history and  
83 genetic mechanisms underlying breed characteristics of global domestic pigs. Moreover, this  
84 study highlights the importance of artificial intraspecies crossbreeding and natural  
85 interspecies hybridization on the phenotypic characteristics of domestic animals.

86

## 87 **Results**

### 88 **Whole-genome sequencing data**

89 We obtained whole-genome sequencing data of 266 animals from 25 populations  
90 (**supplementary table S1**), including 36 highly prolific FLW pigs from the nucleus  
91 populations of two breeding companies. The 36 pigs were selected with their total number  
92 born (TNB) piglets of more than 19 and distant genetic relationship among each individual  
93 (**supplementary fig. S1**). High-depth re-sequencing was conducted on a Hiseq 2000 or 2500  
94 sequencer (Illumina, USA). After filtering raw data (see Methods), we called 32.7 million  
95 single nucleotide polymorphisms (SNPs) from the 266 individuals. For the 28 LW pigs whose  
96 sequence data were retrieved from the public NCBI database (see Methods), we use the  
97 Illumina Porcine SNP60 chip [12] data set to identify their origin. We demonstrated that 14  
98 individuals belonged to the American Large White (ALW) pig, and the other 14 individuals  
99 pertained to the Dutch Large White (DLW) pig (**supplementary fig.S2**).

100

### 101 **Genetic differentiation between SCN and ECN pigs**

102 Eurasian wild boars began to differentiate as early as ~ 1 million years ago [2, 3], and  
103 Chinese and European wild boars were independently domesticated about 10,000 years ago  
104 [1, 3]. The remarkable genetic differentiation between Chinese and Western pigs was  
105 reflected in the results of principal component analysis (PCA), phylogenetic analysis and  
106 admixture analysis (**fig. 1**). In the PCA analysis, the first principal component (PC1)  
107 accounted for 16.32% of the total eigenvalue (PC1 = 16.32%), which clearly separated the  
108 Chinese pig from the Western pig. The second principal component (PC2) showed the  
109 differentiation among Chinese pigs, especially between SCN and ECN pigs (PC2 = 3.78%,  
110 **fig. 1a**). In the neighbor joining tree between individuals (**fig. 1b**) and populations (**fig. 1c**),



111 Chinese and Western pigs defined two separate clades. For Chinese domestic pigs, SCN and  
112 ECN pigs formed two different branches. The clustering pattern was similar to the maximum  
113 likelihood tree revealed by the TreeMix analysis, in which two Sumatras wild boars, one *Sus*  
114 *barbatus*, one *Sus verrucosus*, one *Sus cebifrons*, one *Sus celebensis*, and one *Phacochoerus*  
115 *africanus* were treated as the outgroup (OUT), and the interpretation of the maximum  
116 likelihood tree reached 99.9% (**supplementary fig. S3**). In the admixture analysis, Chinese  
117 pigs and European pigs showed two distinct ancestral lineages when  $K = 2$ , although there  
118 were gene flows between the two groups, especially the North Chinese pig that clearly mixed  
119 with European pig lineages, whereas LW (including FLW) pigs showed signature of  
120 admixture with Chinese pigs. ECN pigs represented by Jinhua pigs and SCN pigs represented  
121 by Luchuan pigs appeared as the two ancestral lineages of Chinese pigs when  $K = 3$  (**fig. 1d**).  
122 Altogether, these findings not only confirmed the independent domestication of Chinese and  
123 European pigs, but also unraveled that SCN pigs and ECN pigs have marked genetic  
124 differentiation and represent two ancient lineages of the Chinese domestic pig.

125

### 126 **SCN and ECN pigs were introgressed into Europe between 220 and 310 years ago**

127 To determine whether SCN and ECN pigs were introduced into Europe via human-mediated  
128 transportation, we performed relative identity-by-descent (rIBD) analysis using whole  
129 genome sequencing data (see Methods). We detected 5,107 and 5,024 50-kb regions with  
130 signatures of potential introgression from SCN or ECN pigs into FLW pigs, respectively (**figs.**  
131 **2a, 2b, supplementary fig. S4**). The introgressed DNA from SCN and ECN pigs differed  
132 greatly in FLW pigs, with an overlap of only 6.0% introgression regions (**fig. 2c**) and 2.9%  
133 genes within the regions (**fig. 2d**). We performed Gene Ontology (GO) and Kyoto  
134 Encyclopedia of Genes and Genomes (KEGG) pathway enrichment analysis for the genes  
135 located in the introgressed regions. The genes within the regions of inferred introgression

136 with SCN pigs and ECN pigs were enriched in the immune-related signaling and fertility  
137 pathways, respectively (**fig. 2e**). We further used ALDER software [13] to estimate that the  
138 time of hybridization between FLW and SCN or ECN pigs was 220-310 years ago, which  
139 was consistent with the historical record stating that SCN pigs were deliberately transported  
140 into England at the onset of the first Industrial Revolution and contributed to the breeding of  
141 LW pigs [11]. In addition, these results support our hypothesis that ECN pigs were also  
142 introduced into Europe to improve productivity of local pigs between 1685 and 1757.

143

#### 144 **The introgressed *GOLMI-NAA35* haplotype from SCN pigs has been under selection to** 145 **enhances the disease resistance of FLW pigs**

146 We detected seven genomic regions with strong signature of introgression from SCN pigs in  
147 the genomes of FLW pigs (rIBD value >0.2; **supplementary table S2**). Two adjacent genes  
148 (3,511 bp apart), *GOLMI* and *NAA35*, were located in one of the seven regions (SSC10:  
149 33.20–33.58 Mb). The *GOLMI* gene encodes a type II Golgi transmembrane protein, which  
150 is mainly synthesized in the rough endoplasmic reticulum, assists in processing proteins in  
151 the Golgi and is responsive to viral infections [14]. In 2016, Li *et al.* [15] reported that the  
152 *GOLMI-NAA35* locus markedly modulate the cytokine interleukin-6 (IL-6) production by  
153 human immune cells in response to multiple pathogens. Given the important role of the  
154 *GOLMI-NAA35* locus in disease resistance, we chose this locus for further study.

155 We first make a close examination on the rIBD results for a 2-Mb region encompassing  
156 the *GOLMI-NAA35* locus (SSC10: 33.20–33.58 Mb). We found that the frequency of shared  
157 IBD haplotypes between FLW and SCN pigs at the *GOLMI-NAA35* locus was significantly  
158 higher than those in the surrounding regions (**fig. 3a**). Moreover, we observed remarkably  
159 elevated genetic differentiation ( $F_{ST}$ ) between FLW pigs and European wild boar in contrast  
160 to particularly decreased  $F_{ST}$  between FLW and SCN pigs in the *GOLMI-NAA35* region (**fig.**

161 **3b**). In addition, there were four main *GOLMI-NAA35* haplotypes in FLW pigs. Most  
162 individuals (32 out of 36) carried haplotypes similar to those of SCN pig. (**fig. 3c**).

163 Next, we used 3,447 SNPs in the *GOLMI-NAA35* region to construct the NJ tree  
164 (**supplementary fig. S5**). We found that most FLW pigs (n = 32) gathered with SCN pigs to  
165 form a branch that was separated from ECN pigs and European pigs, whereas only a small  
166 number of FLW pigs (n = 4) clustered with European pigs, which was in stark contrast to the  
167 genome-wide NJ-tree (**fig. 1a**). We further constructed a haplotype network using 298 SNPs  
168 at the *GOLMI-NAA35* locus (**fig. 3d**). We clearly identified the haplotype VII as being the  
169 main haplotype in the FLW pigs, which appeared 37 times in all populations, including 23 in  
170 FLW pigs, 8 in LW pigs, and 6 in SCN pigs. The SCN-major haplotype VIII and the  
171 haplotype VII differed by only four different sites, whereas the unique haplotypes (XIX,  
172 XXIII and X) of European wild boar and the haplotype VII differed by more than 180 sites  
173 (**supplementary fig. S6**). These results corroborate the historical introgression of SCN pigs  
174 into FLW pigs and illuminate that the haplotype VII at the *GOLMI-NAA35* locus in FLW  
175 pigs originated from SCN pigs.

176 We noted that the introgressed haplotype VII was present in other LW pigs at low  
177 frequencies but absent in other European domestic pigs. It is conceivable because all LW  
178 populations originated in England where SCN pigs were introduced during the first Industrial  
179 Revolution (early 19th century) [7]. Moreover, the introgressed haplotype appeared one time  
180 in European wild boars. Considering the outdoor grazing of early European pigs, we believe  
181 that European wild boars had admixture with European domestic pigs, after which this  
182 haplotype was introgressed from European domestic pigs into European wild boars.

183 The haplotype heatmap of the *GOLMI-NAA35* region showed that the SCN-originated  
184 haplotype VII was frequently present in FLW pigs (**fig. 3c**), which suggested that this  
185 haplotype may be selected in FLW pigs. To verify this hypothesis, we first compared the

186 linkage disequilibrium (LD) values ( $r^2$ ) of the *GOLMI-NAA35* region and a upstream (3 Mb)  
187 region with the same size as the *GOLMI-NAA35* locus. We found that the LD level in the  
188 *GOLMI-NAA35* region of the FLW population ( $r_{0.3}^2 = 192.3$  kb) was significantly higher than  
189 that of all other populations (**supplementary fig. S7a**), whereas the LD value ( $r_{0.3}^2$ ) in the  
190 upstream region was only 17.3 kb, which was similar to most populations (**supplementary**  
191 **fig. S7b**). Subsequently, we performed LD analysis for 10,000 81.9-kb regions randomly  
192 sampled across the genomes of 36 FLW pigs (**supplementary fig. S7c**). We found that the  
193 LD value ( $r^2$ ) in the *GOLMI-NAA35* region ranked in the top 2.6% of the 10,000 bootstrap  
194 results, which was a significant outlier ( $P = 0.02$ ) and suggests that the introgressed  
195 *GOLMI-NAA35* haplotype likely underwent a preference selection in FLW pigs, resulting in  
196 a local increase of LD level in the target region. The XP-EHH analysis also showed the  
197 evidence of selection in the *GOLMI-NAA35* region in FLW pigs but not in other LW pigs  
198 (**fig. 3e**).

199 To examine whether the *GOLMI-NAA35* haplotypes are associated with serum IL-6  
200 contents in FLW pigs, we collected venous blood from 54 healthy adult FLW sows at the  
201 same physiological stage and detected IL-6 levels in the serum of each individual using  
202 enzyme-linked immunoassay (ELISA) (**supplementary table S3**). Meanwhile, we defined  
203 the *GOLMI-NAA35* haplotypes for each individual using two tag SNPs and then tested the  
204 association between these haplotypes and IL-6 content. We found that individuals  
205 homozygously carrying the introgressed haplotype (*QQ*) had significantly higher IL-6  
206 concentrations than heterozygotes (*Qq*) ( $P = 0.015$ , **fig. 3f**). Altogether, a sensible  
207 explanation for the introgression at the *GOLMI-NAA35* locus is that the *GOLMI-NAA35*  
208 haplotype were historically introgressed from SCN pigs into LW pigs and then have been  
209 under preferential selection to improve effective production of IL-6 levels in response to  
210 pathogens and consequently enhance resistance to infectious disease in FLW pigs.

211 Historically, South China was renowned as a land of plague with a humid and stuffy  
212 environment. It was popular for local infectious diseases including malignant malaria that  
213 caused high transmission and mortality rates before the Southern Song Dynasty (1127-1279  
214 AD). The hostile environment imposed server physiological challenges on inhabits in South  
215 China [7]. Native inhabits like humans and pigs are believed to have evolved the adaptive  
216 mechanism to address the harsh environment likely via selection of immune-related genes  
217 during the long history of colonization. It is thus conceivable that those genes including  
218 *GOLMI-NAA35* within the introgression regions from SCN pigs are enriched in the  
219 immune-related signaling pathway. Interestingly, a recent genomic analyses unraveled a list  
220 of genes related to immune response under selection in southern Han Chinese, including  
221 *G6DP* associated with resistance to malaria [16].

222

223 **The introgressed *KATNALI* haplotype from ECN pigs is preferentially selected to**  
224 **increase the fertility of FLW boars**

225 In FLW pigs, a 200-kb region on chromosome 11 (6.675-6.875 Mb) showed the strongest  
226 (the highest rIBD value) signal of admixture with ECN pigs, which contained only one gene,  
227 *KATNALI*. *KATNALI* regulates microtubule dynamics in testicular support cells, affecting  
228 the separation and binding of microtubules. Promoting the rapid reorganization of testicular  
229 support cell microtubule arrays is an essential process for spermatogenesis and male fertility  
230 [17]. Thus, *KATNALI* plays an important role in spermatogenesis. Given the top  
231 introgression signal at the *KATNALI* locus and the role of *KATNALI* in boar fertility, we  
232 conducted an in-depth analysis focusing on the *KATNALI* region using the same method as  
233 used for the *GOLMI-NAA35* locus.

234 We found that the frequency of the shared IBD haplotype between FLW and ECN pigs  
235 in the *KATNALI* region was particularly higher than that in the surrounding segments (**fig.**

236 **4a**). There was a remarkable local increase of  $F_{ST}$  between FLW pigs and European wild boar  
237 and a particular decrease of  $F_{ST}$  between FLW pigs and ECN pigs in the *KATNAL1* region  
238 (**fig. 4b**). FLW pigs had four main haplotypes in this region. Most individuals (30 out of 36)  
239 carried haplotypes highly similar to the ECN haplotypes, and the others were similar to  
240 European wild boars and European domestic pigs (**fig. 4c**). Additionally, 30 FLW pigs and  
241 ECN pigs were clustered into one large clade while only six FLW pigs were grouped with  
242 European pigs in the NJ tree that was constructed with 529 SNPs in the *KATNAL1* gene  
243 (**supplementary fig. S8**). Meanwhile, we constructed a haplotype network using the 529  
244 SNPs (**fig. 4d**) and analyzed nucleotide differences among different haplotypes  
245 (**supplementary fig. S9**). The most frequent haplotype (XXVII) appeared 57 times in the 266  
246 tested individuals, including 35 in FLW pigs, 18 in ECN pigs, 2 in ALW pigs and 2 in SCN  
247 pigs. This haplotype and its closest ECN haplotype (XXV, five different sites,  
248 **supplementary fig. S9**) were divergent from the European pig haplotype groups (**fig. 4d**).  
249 These results further demonstrate that the *KATNAL1* haplotypes were introgressed from ECN  
250 pigs into FLW pigs.

251 We performed LD bootstrap sampling and XP-EHH analysis to detect the evidence of  
252 selection at the *KATNAL1* locus in FLW pigs. First, we compared the LD value ( $r^2$ ) of the  
253 *KATNAL1* region and those of 10,000 randomly selected genomic regions with the same size  
254 of the *KATNAL1* gene (43.4 kb). We found that the LD level in the *KATNAL1* region ( $r^2_{0.3=}$   
255 437.5 kb) was a significant ( $P = 0.02$ ) outlier, ranking in the top 2.5% of 10,000 bootstrap  
256 results (**supplementary fig. S10**). We also detected a significant selection signal at the  
257 *KATNAL1* locus in FLW pigs but not in other LW pigs using XP-EHH (**fig. 4e**). These results  
258 suggest that the introgressed *KATNAL1* haplotype from ECN pigs is preferentially selected in  
259 FLW pigs.

260 Given the important role of *KATNAL1* in male fertility, the fecundity of ECN pigs and  
261 historical selection for fecundity in FLW pigs, we speculated that the introgressed *KATNAL1*  
262 haplotype could contribute to the improvement of male reproductive performance and thus  
263 have underwent selection in FLW pigs since introgression. To test this hypothesis, we  
264 analyzed the association between the *KATNAL1* haplotypes and the FLW boar fertility that  
265 was represented by the average estimated breeding value (EBV) for TNB of mating sows. We  
266 detected a significant difference in boar fertility between 17 homozygous carriers of the  
267 introgressed haplotype (*QQ*) and 14 carriers of non-ECN pig haplotypes (*qq*) ( $P = 0.036$ ; **fig.**  
268 **4f**). The EBV for TNB (EBV-TNB) of *QQ* individuals was 0.018, with a difference of 0.32  
269 (equates to an increase of 0.32 piglets born) compared with *qq* individuals. As TNB is a  
270 complex multi-locus trait, an increase of 0.32 piglets born is substantial for the current pig  
271 breeding programs. This indicates that the introgressed *KATNAL1* haplotype has been  
272 favored and intensively selected by breeders, contributing to the formation of excellent  
273 reproductive traits in FLW pigs.

274

#### 275 ***AHR* haplotypes that associate with increased litter size were likely introgressed from** 276 **ECN pigs into LW pigs**

277 In 2014, Bosse *et al.* [11] found that Chinese haplotypes in a 6.8-Mb region on chromosome  
278 9 containing the *AHR* gene were introgressed into European pigs and were preferentially  
279 selected to increase fertility during the development of LW pigs. We also conducted a shared  
280 haplotype test (rIBD) between 121 Chinese pigs and 64 LW pigs in the 6.8-Mb region. We  
281 confirmed the presence of Chinese-derived haplotypes in European pigs including FLW pigs,  
282 with a strong introgression signal at the *AHR* locus (SSC9: 92.25–97.45 Mb)  
283 (**supplementary fig. S11**). To explore the geographic origin of the introgressed Chinese *AHR*  
284 haplotypes, we first constructed a phylogenetic tree of all sequenced individuals around the

285 *AHR* region, and surprisingly found that most of domestic pigs were clustered together with  
286 small genetic distance but were divergent from European and Asian wild boars  
287 (**supplementary fig. S12a**). We further reconstructed and visualized haplotypes around the  
288 *AHR* gene (95.5–95.65 Mb) and found that most haplotypes of LW pigs were highly similar  
289 to those of Chinese EHL pigs and Tibetan pigs (**fig. 5a**). In the NJ-tree of this region, 15  
290 FLW pigs gathered with EHL pigs and Tibetan pigs, defining a branch distinct from other  
291 Chinese breeds (**supplementary fig. S12b**). In addition, FLW pigs and EHL pigs had the  
292 smallest  $F_{ST}$  value with the exception of other LW pigs (**supplementary fig. S12c**). Given  
293 the geographic distance between Tibet and Europe and the lack of any historical records  
294 describing the importation of Tibetan pigs into Europe, we argue that Chinese derived *AHR*  
295 haplotypes in FLW pigs were most likely introgressed from ECN pigs such as EHL pigs.

296

### 297 **The *AHR* haplotype was introgressed into Chinese pigs via ancient interspecies** 298 **hybridization**

299 We noticed that the *AHR* haplotypes of most Chinese pigs were highly similar, but were  
300 distinct from those of Asian and European wild boars (**figs. 5a**). Moreover, a large proportion  
301 of Chinese domestic pigs such as EHL pigs had a smaller nucleotide distance from the OUT  
302 population than from Asian wild boars in the *AHR* region (**supplementary fig. S13**); this was  
303 unexpected, as we know that these domestic pigs originated from wild boars. One possible  
304 explanation is that *AHR* haplotypes of many Chinese domestic pigs were not derived from  
305 Chinese wild boars but from another potentially extinct *Sus* species. To test this hypothesis,  
306 we constructed a haplotype network using 133 SNPs in the *AHR* gene (see Methods).  
307 Interestingly, we observed three distinct haplotype groups, one included haplotype of Asian  
308 wild boars and Chinese domestic pigs, one comprised those of European wild boars and  
309 European domestic pigs, and the other was defined by haplotypes of Eurasian domestic pigs



310 and OUT individuals (**fig. 5b**). In addition, the most frequent haplotype (XVI) appeared 100  
311 times in all 266 sequenced individuals, including 30 in FLW pigs, 24 in other LW pigs, 18 in  
312 EHL pigs and 26 in Tibetan pigs. This haplotype had a close phylogenetic relationship with  
313 the OUT haplotype XII but was divergent from the major haplotypes (II and VII) of Eurasian  
314 wild boars (**fig. 5b**), a pattern expected under introgression. Note that the nucleotide  
315 difference between the haplotype XVI and the OUT haplotype XII was only 7, in contrast to  
316 100 between haplotypes XVI and II and 93 between haplotypes XVI and VII (**fig. 5c**). These  
317 findings corroborate our assumption that the haplotype XVI was introgressed from a  
318 divergent archaic *Sus* population into the ancestors of Chinese domestic pigs via naturally  
319 occurring interspecies hybridization, then introduced from ECN pigs into European domestic  
320 pigs through human-mediated transportation about 200-300 years ago, and thus rarely existed  
321 in Eurasian wild boars.

322 To provide further evidence for the possible interspecies hybridization at the *AHR* locus,  
323 we selected 38 individuals from OUT, Asian wild boars (AWB), and ECN pigs (EHL as an  
324 example) to perform allele frequency difference analysis, and calculated the ratio of OUT  
325 SNPs in EHL pigs per window with a sliding window of 50 kb across the genome (see  
326 Methods). Of note, a total of 63 SNPs in the 50-kb window containing the *AHR* gene were  
327 potential archaic SNPs derived from the OUT population, accounting for 66% of total SNPs  
328 in this window. This ratio was the largest one in all 45,429 windows genome-wide (**fig. 5d**).  
329 Furthermore, we used an improved ABBA-BABA method ( $f_D$ ) for gene flow analysis (see  
330 Methods). Interestingly, we detected an extreme outlier signal that the window containing the  
331 *AHR* gene had an  $f_D$  value greater than 0.8 corroborated by a significant outlier of the  
332 nucleotide distance ( $D_{xy}$ ) between EHL pigs and AWB (**fig. 5e**). In addition, the nucleotide  
333 distance of EHL pigs versus AWB and FLW pigs versus European wild boars reached 2.05  
334 and 2.48, respectively; whereas the nucleotide distance of EHL pigs versus OUT animals and

335 FLW pigs versus OUT animals were only 1.51 and 1.41, respectively (**supplementary fig.**  
336 **S13**). Altogether, our data strongly support the archaic introgression at the *AHR* locus.

337 We noted that the introgressed haplotype XVI was desirable for increasing the  
338 EBV-TNB of both FLW pigs (**fig. 5f**) and EHL pigs (**fig. 5g**). By genotyping the haplotype  
339 tag SNPs and one-way analysis of variance (see Methods), we found that homozygous  
340 carriers of the archaic *AHR* haplotype (XVI) had 0.24 higher EBV-TNB than heterozygous  
341 carriers ( $P = 0.001$ , **supplementary table S7**) in EHL pigs. Moreover, the introgressed  
342 archaic *AHR* haplotype was significantly associated with increased EBV-TNB of FLW sows  
343 with an additive effect value of 0.25 ( $P = 2.39e-05$ ; **fig. 5f, supplementary table S6**), which  
344 was in agreement with the report of Bosse *et al.*[11]. Similar to *KATNAL1* and  
345 *GOLMI-NAA35* regions, the LD value of FLW pigs in the *AHR* gene region ranked in the top  
346 7% (significant outlier) of all 10,000 bootstrap values ( $P = 0.03$ , **supplementary fig. S14**).  
347 We also detected a significant iHS selection signal within the FLW pig population  
348 (**supplementary fig. S15**). These findings enable us to conclude that the archaic *AHR*  
349 haplotype has been under a preferential selection to improve the fertility of FLW pigs.

350

## 351 **Discussion**

352 European and Asian domestic pigs were independently domesticated from European and  
353 Asian wild boars, respectively, nearly 10,000 years ago [3, 5, 6]. In this study, population  
354 genetics analyses confirmed striking genetic differences between Chinese and European  
355 domestic pigs and uncovered obvious genetic differentiation between SCN and ECN pigs,  
356 which represent two ancestral lineages of Chinese pigs. Of note, we identified Chinese  
357 haplotypes in FLW pigs, which were introgressed from both SCN and ECN pigs. We inferred  
358 that the introgression events occurred 220–310 years ago, which is in accordance with  
359 historical records that SCN pigs were transported to the England through the Guangzhou port

360 during the first Industrial Revolution [7]. Our results also supported the speculation that ECN  
361 pigs were introduced into Europe likely through the Shanghai and Ningbo ports in the  
362 decades before the Qing Dynasty imposed the ban on the sea in 1757. Thus, we believe that  
363 both SCN and ECN pigs were introduced to Europe to improve production performance of  
364 local breeds, contributing to the development of modern European commercial pig breeds.  
365 Taking the *GOLMI-NAA35* and *KATNALI* loci as examples, the introgressed  
366 *GOLMI-NAA35* haplotype from SCN pigs is beneficial for improving disease resistance in  
367 FLW pigs, and the introgressed *KATNALI* haplotype from ECN pigs is favorable for boar  
368 fertility and provides genetic variations for the development of high-fecundity FLW pigs.  
369 These findings not only advance our understanding of the breeding history of modern  
370 European commercial pig breeds but also shed insights into the genetic mechanisms  
371 underlying economically important traits in pigs.

372 In recent years, emerging reports have shown that interspecies hybridization played an  
373 important role in adaptive evolution of mammals. For example, the Denisova-like *EPAS1*  
374 haplotype help Tibetans to adapt to the high-altitude hypoxia environment [18]. Admixture  
375 with yak enabled Tibetan cattle to quickly obtain favorable *EGPNI* alleles for high-altitude  
376 adaptation [19]. We reported an archaic adaptive introgression on the X chromosome that  
377 contributed to the adaptation of North Chinese pigs to high-latitude cold environments [20].  
378 Here, we show that the *AHR* haplotype associated with increased sow litter size was derived  
379 from an archaic population. It was first introgressed into Chinese pigs via interspecies  
380 hybridization. Then it was introduced from ECN pigs into European pigs such as Large  
381 White through human-mediated transportation and hybridization some 200–300 years ago. It  
382 has further experienced preferentially selection presumably during the past decades and is  
383 present at high frequency in FLW pigs, contributing to the improvement of the reproductive  
384 performance in this breed. Thus, this study provides another example of the archaic adaptive

385 introgression in domestic animals. It also shows that both naturally occurring interspecies  
386 hybridization and human-driven crossbreeding play important roles in the development of  
387 global pig breeds, illustrating a complex breeding history of domestic pigs.

388

## 389 **Materials and Methods**

### 390 **Samples**

391 All procedures used for this study and involving animals were in compliance with guidelines  
392 for the care and utility of experimental animals established by the Ministry of Agriculture of  
393 China. The ethics committee of Jiangxi Agricultural University approved this study. This  
394 study utilized genome-wide re-sequencing data from 266 animals (**supplementary table S1**),  
395 of which 153 pigs were re-sequenced for this study and 113 genome sequence data were  
396 downloaded from the public database (Registration Nos. ERP001813 [21], PRJEB9922 [22],  
397 and SRP047260 [23]). Among the 153 pigs, 36 were FLW sows and were collected from the  
398 Guangdong WENS Food Company (24 individuals) and Jiangxi Lvhuan Animal Husbandry  
399 Company (12 individuals). The 36 FLW sows were selected according to the following  
400 criteria. First, we calculated the relationship coefficients of all individuals in the nucleus  
401 populations of the two companies using the DMU software [24] and pedigree records. Then  
402 we selected sows with a small relationship coefficient and excellent litter sizes (TNB more  
403 than 16). Finally, we chose 36 prolific individuals with distant kinship according to the  
404 phylogenetic relationship network constructed by Cytoscape v3.2.1 [25] (**supplementary fig.**  
405 **S1**). In total, there were 27 wild boars from China and Europe, 7 outgroup individuals, 121  
406 pigs from Chinese indigenous breeds, and 111 pigs from European commercial breeds.  
407 According to the geographic distribution, Chinese domestic pigs were divided into ECN (37)  
408 pigs, SCN (20) pigs, SWCN (36) pigs, and NCN (28) pigs (see **supplementary table S1** for  
409 details). In addition, whole-genome sequence data of 28 LW pigs were downloaded from the

410 public database; 14 individuals submitted by Seoul National University [23] and another 14  
411 individuals submitted by Wageningen University [21]. To identify the source of these 28 LW  
412 pigs, we downloaded the Illumina 60K chip SNP data set of 76 LW pigs [26], including 20  
413 Dutch Large White pigs (NLW), 16 Danish Large White pigs (DLW), 20 Chinese Large  
414 White pigs (CLW), and 20 American Large White pigs (ALW). Next, we retrieved the same  
415 60K chip SNPs from the whole-genome sequence data sets of the 28 LW pigs. We filtered  
416 out SNPs with an MAF less than 0.05, a call rate less than 90%, and a LD ( $r^2$ ) value more  
417 than 0.3 using PLINK v1.9 [27], and we performed PCA and NJ-tree analyses using the  
418 remained SNPs to identify the origin of the 28 LW pigs (**supplementary fig. S2**).

419

#### 420 **Whole-genome sequencing and SNP calling**

421 We extracted genomic DNA from the ear tissues of 153 pigs using a routine  
422 phenol/chloroform protocol, and eligible samples were delivered to the Novogene company  
423 (Beijing, China). Sequencing was performed on Hiseq 2000 or 2500 instruments (Illumina,  
424 USA). The sequencing library was constructed with 125 bp paired ends (PE125), a 500 bp  
425 average insert fragment, and a fragment less than 800 bp. The genome sequencing coverage  
426 of each individual was at least 20× with a minimum data of 60 G.

427 **Quality control:** We generated the raw sequencing data from Hiseq sequencing  
428 platform using raw image data. We obtained clean data to perform a downstream analysis  
429 according to the following steps: (1) remove the linker sequence, (2) retain reads with Q20  
430 more than 90% (the probability of base recognition correct rate higher than 99%) and Q30  
431 more than 85% (the probability of base recognition correct rate higher than 99.9%)[28], (3)  
432 cull short repeat DNA segments, and (4) filter reads with three consecutive "N".

433 **Mutation detection:** We established the reference genome index of Sscrofa 10.2 [6]  
434 using an index function in BWA v0.7.12 [29]. We blasted paired-end reads against the index

435 using aln algorithm from BWA and obtained binary bam files from sam files by SAMtools  
436 v1.4 [30]. We used samblaster v0.1.22 [31] to reject redundancy information and calculated  
437 the alignment rate between re-sequencing data and the reference genome, as well as coverage  
438 and sequencing depth. We sorted binary bam files via GATK v3.7 [32]. We used the  
439 HaplotypeCaller function for mutation detection across each chromosome of each individual  
440 and obtained an SNP data set of the 266 individuals by deleting InDel information. We  
441 filtered out SNPs with an MAF less than 0.01 and a call rate less than 90% using PLINK v1.9  
442 [27]. We used the remaining 32.7 million SNPs in the data set for subsequent statistical  
443 analysis.

444

#### 445 **Population genetic analysis**

446 First, we generated the SNP data set with an MAF more than 0.05 and a call rate more than  
447 90% from autosomal SNPs of 259 pigs (*Sus scrofa*) excluding seven OUT individuals.  
448 Second, we pruned SNPs with an LD ( $r^2$ ) decay more than 0.3 in each window with 50 SNPs  
449 using command indep-pairwise (50 10 0.3) in PLINK v1.9 [27]. Then four principal  
450 components of each individuals were estimated using --pca command in the GCTA software  
451 [33]. Average shared allele (1-Dst) distance matrix among individuals was constructed using  
452 command --distance-matrix in PLINK v1.9. A rootless NJ tree was constructed through  
453 phylip v3.69 [34] and was visualized with FigTree v1.42. We also explored the unbiased  
454 estimation method proposed by Weir and Cockerham to calculate the genetic differentiation  
455 ( $F_{ST}$ [35]) matrix among 14 Chinese pig breeds and 6 European pig breeds using --fst  
456 command in PLINK v1.9 ([27]. Then, we constructed the interbreed NJ tree using phylip  
457 v3.69 [34]. ADMIXTURE [36] was used to estimate ancestral lineage composition under the  
458 default parameter. First, we removed OUT and a population with fewer than five individuals.  
459 Then we randomly selected six individuals from the remaining 21 populations and filtered

460 out SNPs with MAF less than 0.05, LD ( $r^2$ ) more than 0.3, and call rate less than 90%.  
461 Finally, we used a data set with 125 individuals and 658,601 SNPs to analyze the ancestral  
462 lineage composition pattern. In addition, we utilized TreeMix v1.12 [37] to infer the genetic  
463 differentiation among populations. We set OUT as the outgroup population, excluding  
464 populations with fewer than six samples and SNPs with MAF less than 0.05 and a call rate  
465 less than 90%. We used the data set with 19,282,590 SNPs to estimate genetic differentiation  
466 among 21 populations under no migration events via TreeMix v1.12 [37].

467

### 468 **Introgression analysis**

469 We detected the introgression signals between Chinese pigs (ECN and SCN pigs) and FLW  
470 pigs by sharing IBD frequency proposed by Bosse *et al* [11]. First, we used the data set with  
471 266 individuals and approximately 20 million SNPs to phase haplotypes using fastPhase  
472 function [38] in Beagle v4.0 and to detect IBD fragments in each individual by fastIBD  
473 function [39]. Then we divided the whole genome into numbers of 50-kb windows (25 kb  
474 sliding) and calculated shared IBD haplotype numbers between two populations (FLW vs.  
475 European wild boars (EWB), FLW vs. ECN, and FLW vs. SCN) in each window. We phased  
476 the haplotypes and detected the IBD regions independently for 10 times and then normalized  
477 the IBD values (nIBD). The nIBD values ranged from 0 (no shared IBD detected) to 1 (all  
478 individuals shared the IBD haplotype). Finally, we used the rIBD (relative frequency of IBD)  
479 statistic to measure the shared IBD between FLW pigs and SCN or ECN pigs, respectively  
480 ( $rIBD_{FLW-SCN} = nIBD_{FLW-SCN} - nIBD_{FLW-EWB}$ ,  $rIBD_{FLW-ECN} = nIBD_{FLW-ECN} - nIBD_{FLW-EWB}$ ),  
481 where a positive rIBD indicates potential introgression and 1% and 5% empirical distribution  
482 in the far right tail were set as the significance thresholds. For genomic regions showing  
483 strong rIBD introgression signal in FLW pigs, we further estimated  $F_{ST}$  between FLW pigs  
484 and European wild boars, as well FLW pigs and Chinese pigs (SCN pigs or ECN pigs),

485 respectively. We also constructed a haplotype network at the *GOLMI-NAA3*, *KATNAL1* and  
486 *AHR* loci using “haploNet” command in R package “pegas” [40]. We used ALDER v1.0.3  
487 [13] to estimate admixture time between populations. In short, we used the “convert”  
488 function in EIGENSTRAT [41] to convert the data format. We set FLW as a mixed  
489 population, EWB and SCN as one reference population, and EWB and ECN as another  
490 reference population. We set five years as one generation to estimate admixture time between  
491 EWB and SCN as well between EWB and ECN.

492

### 493 **Signature of selection**

494 We used the data set that excluded SNPs with an MAF less than 0.05 and a call rate less than  
495 90% in the whole-genome SNPs data set of 36 FLW pigs to calculate correlation coefficient  
496 ( $r^2$ ) of each SNP pairs in a target region using command --r2 inter-chr --ld-window-r2 0 in  
497 PLINK v1.9 [40], and we used the average  $r^2$  as the LD value in the region. Meanwhile, we  
498 randomly selected 10,000 regions with the same size of the target region across the genome,  
499 and we calculated the average  $r^2$  of each region in the 36 FLW pigs. Finally, we visualized  
500 the density curve of 10,000 bootstrap values using the R language code. Furthermore, we  
501 used commands --ihs [42] and --xpehh [43] in the selscan [44] software to detect signatures  
502 of selection under 50-kb windows with a step size of 25 kb in FLW pigs.

503

### 504 **Archaic introgression test**

505 We used an improved  $f_D$  method [45] under ABBA-BABA statistic to detect the potential  
506 archaic introgression in the *AHR* region between the OUT population and EHL pigs. The  
507 calculation formulas was as follows:

$$508 \quad C_{ABBA}(i) = (1 - p_{i1})p_{i2}p_{i3}(1 - p_{i4})$$

$$509 \quad C_{BABA}(i) = (1 - p_{i1})p_{i2}(1 - p_{i3})p_{i4}$$



510 
$$S(p_1, p_2, p_3, O) = \sum [C_{ABBA}(i) - C_{BABA}(i)]$$

511 
$$f_D = \frac{S(p_1, p_2, p_3, O)}{S(p_1, p_D, p_D, O)}$$

512 where  $p_{ij}$  indicates the  $i$ th frequency of the derived allele in the  $j$ th population, S represents  
 513 sum of difference between ABBA and BABA, and  $p_D$  means populations with higher  
 514 frequency of the derived allele (P2 or P3). According to the NJ tree, Asian wild boars, EHL,  
 515 and five OUT individuals (two Sumatras, one *Sus barbatus*, one *Sus verrucosus*, and one *Sus*  
 516 *cebifrons*) and one OUT individual (*Phacochoerus africanus*) were set as P1, P2, P3, and O,  
 517 respectively.

518 Nucleotide differences within ( $D_x$ ) and among ( $D_{xy}$ ) populations were calculated using  
 519 follow formulas [20]:

520 
$$D_x = \frac{2}{n_x(n_x - 1)l} \sum_{i=1}^{n_x-1} \sum_{j=i+1}^{n_x-1} k_{ij}$$

521 
$$D_{xy} = \frac{2}{n_x n_y l} \sum_{i=1}^{n_x} \sum_{j=1}^{n_y} k_{ij}$$

522 where  $k_{ij}$  indicates difference number of haplotype alleles between the  $i$ th allele the  $j$ th  
 523 allele in target region,  $n_x$  and  $n_y$  represent number of haplotypes in population  $x$  and  $y$ , and  
 524  $l$  indicates the number of bases that are valid in the target area (the number of bases other  
 525 than N in the reference sequence). In addition, 38 individuals were selected from OUT (7),  
 526 Asian wild boar (10), and Erhualian populations (21) and pruned SNPs with MAF less than  
 527 0.05 and call rate less than 90%, leaving 14,333,796 SNPs. We used 50-kb windows with a  
 528 sliding size of 25 kb filtering windows with less than 10 SNPs to calculate the allele ratio  
 529 ( $r_D = n_i/n_o$ ) in each window, where  $n_o$  indicates the number of SNPs with an allele  
 530 frequency more than 0.7 in each window in OUT, and  $n_i$  represents the number of SNPs

531 with an allele frequency more than 0.6 in EHL pigs as well less than 0.15 in Chinese wild  
532 boars. The  $r_D$  of the *AHR* region is shown using a probability density curve.

533

### 534 **Haplotype association analysis**

535 **The *GOLMI-NAA35* locus:** We detected the serum IL-6 levels in 54 mature FLW sows  
536 at the age of 2-2.5 years from the same farm using the Porcine IL-6 ELISA Kit (Shanghai  
537 Keshun Biological Technology, China). The concentration of each individual was determined  
538 from the averaged repeat of three trials per individual. Meanwhile, we selected two tag SNPs  
539 to distinguish the introgressed haplotypes (VII and VIII) from the other haplotype in the  
540 *GOLMI-NAA35* region in FLW pigs (**fig. 3e**). The tag SNPs were genotyped by Sanger  
541 sequencing PCR products amplified with specific primers (**supplementary table S3**).  
542 Student's *t*-test was used to detect the association between haplotypes and the serum IL-6  
543 concentrations ( $\log_2$  (IL-6 values)).

544 **The *KATNAL1* locus:** We collected 765 FLW sows and 31 FLW boars from Jiangxi  
545 Lvhuan Farming Group. First, we filtered parities with litter size less than five piglets. Then  
546 we set estrus, year, season, parity and pregnancy duration as fixed effect, and mating boars  
547 and random sow effects as random effects; and estimated EBV for TNB of 765 FLW pigs via  
548 the DMU software [24] and pedigree information. Next, we genotyped eight tagged SNPs to  
549 distinguish each *KATNAL1* haplotype in the 31 FLW boars by PCR amplification and Sanger  
550 sequencing with primers listed in **supplementary table S4**. We denoted the introgressed  
551 XXVII haplotype from ECN pigs as *Q* (**fig. 4e**) and the other haplotypes as *q*  
552 (**supplementary table S5**). Finally, we used Student's *t*-test to test the association between  
553 *KATNAL1* haplotypes and the average EBV-TNB of mating sows of the 31 FLW boars.

554 **The *AHR* locus:** We genotyped two tagged SNPs representing the *AHR* haplotypes for  
555 344 FLW sows by PCR amplification and Sanger sequencing with primers listed in

556 **supplementary table S6.** We identified 230 *QQ* sows homozygous for the introgressed  
557 haplotype, 36 *Qq* sows and 78 *qq* sows absent from the introgressed haplotypes  
558 (**supplementary table S6**). Then we tested the association between the *AHR* haplotypes and  
559 EBV-TNB of the 344 sows using single-factor analysis of variance. Furthermore, we  
560 collected 221 Erhualian sows with multiparity records from Jiangsu Province and calculated  
561 EBV-TNB of these sows using the DMU software and pedigree information as mentioned  
562 above. We genotyped a tag SNP in the *AHR* region by Sanger sequencing PCR products with  
563 specific primers (**supplementary table S7**). We detected 176 *QQ* sows homozygous for the  
564 introgressed haplotype and 45 heterozygous (*Qq*) sows. We used Student's *t*-test to examine  
565 the association between *AHR* haplotypes and EBV-TNB in Erhualian sows.

566

## 567 **Author Contributions**

568 J.R. and L.H. designed the study and analyzed data. J.R., H.C. and L.H. wrote the paper. H.C.,  
569 M.H., and B.Y. performed bioinformatic analyses. H.C., M.H., Z.D. Z.W. and Y.H. collected  
570 data and performed sequencing and genotyping experiments.

571

## 572 **Competing financial interests**

573 The authors declare no competing financial interests

574

## 575 **Acknowledgement**

576 This study is supported by Natural Science Foundation of China (31525023) and National  
577 Key Research Project of China (2016ZX08006-5).

579 **References**

- 580 1. Giuffra E, Kijas JM, Amarger V, Carlborg O, Jeon JT and Andersson L. The origin of  
581 the domestic pig: independent domestication and subsequent introgression. *Genetics*.  
582 2000;154 4:1785-91.
- 583 2. Kijas JM and Andersson L. A phylogenetic study of the origin of the domestic pig  
584 estimated from the near-complete mtDNA genome. *Journal of Molecular Evolution*.  
585 2001;52 3:302-8.
- 586 3. Larson G, Dobney K, Albarella U, Fang M, Matisoosmith E, Robins J, et al. Worldwide  
587 phylogeography of wild boar reveals multiple centers of pig domestication. *Science*.  
588 2005;307 5715:1618-21.
- 589 4. Frantz LA, Schraiber JG, Madsen O, Megens HJ, Bosse M, Paudel Y, et al. Genome  
590 sequencing reveals fine scale diversification and reticulation history during speciation in  
591 *Sus*. *Genome Biol*. 2013;14 9:R107. doi:10.1186/gb-2013-14-9-r107.
- 592 5. Frantz L, Meijaard E, Gongora J, Haile J, Groenen MAM and Larson G. The evolution  
593 of Suidae. *Annual Review of Animal Biosciences*. 2016;4 1:61.
- 594 6. Groenen MA, Archibald AL, Uenishi H, Tuggle CK, Takeuchi Y, Rothschild MF, et al.  
595 Analyses of pig genomes provide insight into porcine demography and evolution.  
596 *Nature*. 2012;491 7424:393.
- 597 7. Wang L, Chan YF, Russell P, Mauceli E, Johnson J, Swofford R, et al. *Animal Genetic  
598 Resources in China: pigs* (ed. China National Commission of Animal Genetic  
599 Resources). China Agriculture Press; 2011.
- 600 8. Rischkowsky B and Pilling D. *The State of the World's Animal Genetic Resources for  
601 Food and Agriculture* (Food and Agriculture Organization (FAO)). 2007.
- 602 9. Briggs HM and Briggs DM. *Modern Breeds of Livestock*. 4th ed. Macmillan Publishing  
603 Co.,Inc.; 1980.
- 604 10. Zhang W. Introduction to Large White pigs. *SWINE PRODUCTION*. 2011; 1:61-4.

- 605 11. Bosse M, Megens HJ, Frantz LA, Madsen O, Larson G, Paudel Y, et al. Genomic  
606 analysis reveals selection for Asian genes in European pigs following human-mediated  
607 introgression. *Nat Commun.* 2014;5:4392. doi:10.1038/ncomms5392.
- 608 12. Ramos AM, Crooijmans RP, Affara NA, Amaral AJ, Archibald AL, Beever JE, et al.  
609 Design of a high density SNP genotyping assay in the pig using SNPs identified and  
610 characterized by next generation sequencing technology. *PLoS One.* 2009;4 8:e6524.  
611 doi:10.1371/journal.pone.0006524.
- 612 13. Loh PR, Lipson M, Patterson N, Moorjani P, Pickrell JK, Reich D, et al. Inferring  
613 admixture histories of human populations using linkage disequilibrium. *Genetics.*  
614 2013;193 4:1233.
- 615 14. Kladney RD, Bulla GA, Guo L, Mason AL, Tollefson AE, Simon DJ, et al. GP73, a  
616 novel Golgi-localized protein upregulated by viral infection. *Gene.* 2000;249 1–2:53-65.
- 617 15. Li Y, Oosting M, Deelen P, Ricañoponce I, Smeekens S, Jaeger M, et al.  
618 Inter-individual variability and genetic influences on cytokine responses to bacteria and  
619 fungi. *Nature Medicine.* 2016;22 10:1192.
- 620 16. Liu S, Huang S, Chen F, Zhao L, Yuan Y, Francis SS, et al. Genomic Analyses from  
621 Non-invasive Prenatal Testing Reveal Genetic Associations, Patterns of Viral Infections,  
622 and Chinese Population History. *Cell.* 2018;175 2:347-59 e14.  
623 doi:10.1016/j.cell.2018.08.016.
- 624 17. Smith LB, Milne L, Nelson N, Eddie S, Brown P, Atanassova N, et al. KATNAL1  
625 Regulation of Sertoli Cell Microtubule Dynamics Is Essential for Spermiogenesis and  
626 Male Fertility. *Plos Genetics.* 2012;8 5:e1002697.
- 627 18. Huertasánchez E, Jin X, Bianba Z, Peter BM, Vinckenbosch N, Liang Y, et al. Altitude  
628 adaptation in Tibetans caused by introgression of Denisovan-like DNA. *Nature.*  
629 2014;512 7513:194-7.
- 630 19. Wu DD, Ding XD, Wang S, Wójcik JM, Zhang Y, Tokarska M, et al. Pervasive  
631 introgression facilitated domestication and adaptation in the *Bos* species complex.  
632 *Nature ecology & evolution.* 2018.

- 633 20. Ai H, Fang X, Yang B, Huang Z, Chen H, Mao L, et al. Adaptation and possible ancient  
634 interspecies introgression in pigs identified by whole-genome sequencing. *Nat Genet.*  
635 2015;47 3:217-25. doi:10.1038/ng.3199.
- 636 21. Rubin CJ, Megens HJ, Martinez Barrio A, Maqbool K, Sayyab S, Schwochow D, et al.  
637 Strong signatures of selection in the domestic pig genome. *Proc Natl Acad Sci U S A.*  
638 2012;109 48:19529-36. doi:10.1073/pnas.1217149109.
- 639 22. Frantz LA, Schraiber JG, Madsen O, Megens HJ, Cagan A, Bosse M, et al. Evidence of  
640 long-term gene flow and selection during domestication from analyses of Eurasian wild  
641 and domestic pig genomes. *Nature Genetics.* 2015;47 10:1141.
- 642 23. Sunjin M, Tae-Hun K, Kyung-Tai L, Woori K, Taeheon L, Si-Woo L, et al. A  
643 genome-wide scan for signatures of directional selection in domesticated pigs. *BMC*  
644 *Genomics*,16,1(2015-02-25). 2015;16 1:1-12.
- 645 24. Madsen P, Sørensen P, Su G, Damgaard LH, Thomsen H and Labouriau R. DMU - a  
646 package for analyzing multivariate mixed models. In: *Proceedings of the 8th World*  
647 *Congress on Genetics Applied to Livestock Production, Belo Horizonte, Minas Gerais,*  
648 *Brazil, 13-18 August, 2006* 2014, pp.27-11.
- 649 25. Shannon P, Markiel A, Ozier O, Baliga NS, Wang JT, Ramage D, et al. *Cytoscape: A*  
650 *Software Environment for Integrated Models of Biomolecular Interaction Networks.*  
651 *Routledge; 2003.*
- 652 26. Yang B, Cui L, Perez-Enciso M, Traspov A, Crooijmans R, Zinovieva N, et al.  
653 Genome-wide SNP data unveils the globalization of domesticated pigs. *Genet Sel Evol.*  
654 2017;49 1:71. doi:10.1186/s12711-017-0345-y.
- 655 27. Chang CC, Chow CC, Tellier LC, Vattikuti S, Purcell SM and Lee JJ.  
656 Second-generation PLINK: rising to the challenge of larger and richer datasets.  
657 *Gigascience.* 2015;4:7. doi:10.1186/s13742-015-0047-8.
- 658 28. Ewing B and Green P. Base-calling of automated sequencer traces using phred. II. Error  
659 probabilities. *Genome Res.* 1998;8 3:186-94.
- 660 29. Li H and Durbin R. Fast and accurate short read alignment with Burrows-Wheeler  
661 transform. *Bioinformatics.* 2009;25 14:1754-60. doi:10.1093/bioinformatics/btp324.

- 662 30. Li H. A statistical framework for SNP calling, mutation discovery, association mapping  
663 and population genetical parameter estimation from sequencing data. *Bioinformatics*.  
664 2011;27 21:2987-93. doi:10.1093/bioinformatics/btr509.
- 665 31. Faust GG and Hall IM. SAMBLASTER: fast duplicate marking and structural variant  
666 read extraction. *Bioinformatics*. 2014;30 17:2503-5. doi:10.1093/bioinformatics/btu314.
- 667 32. McKenna A, Hanna M, Banks E, Sivachenko A, Cibulskis K, Kernytsky A, et al. The  
668 Genome Analysis Toolkit: a MapReduce framework for analyzing next-generation DNA  
669 sequencing data. *Genome Res*. 2010;20 9:1297-303. doi:10.1101/gr.107524.110.
- 670 33. Yang J, Lee SH, Goddard ME and Visscher PM. GCTA: a tool for genome-wide  
671 complex trait analysis. *Am J Hum Genet*. 2011;88 1:76-82.  
672 doi:10.1016/j.ajhg.2010.11.011.
- 673 34. Cummings MP. PHYLIP (phylogeny inference package). *Dictionary of Bioinformatics  
674 and Computational Biology*. 2004.
- 675 35. Weir BS and Cockerham CC. Estimating F-Statistics for the Analysis of Population  
676 Structure. *Evolution*. 1984;38 6:1358-70. doi:10.1111/j.1558-5646.1984.tb05657.x.
- 677 36. Alexander DH, Novembre J and Lange K. Fast model-based estimation of ancestry in  
678 unrelated individuals. *Genome Res*. 2009;19 9:1655-64. doi:10.1101/gr.094052.109.
- 679 37. Pickrell JK and Pritchard JK. Inference of population splits and mixtures from  
680 genome-wide allele frequency data. *PLoS Genet*. 2012;8 11:e1002967.  
681 doi:10.1371/journal.pgen.1002967.
- 682 38. Browning SR and Browning BL. Rapid and accurate haplotype phasing and  
683 missing-data inference for whole-genome association studies by use of localized  
684 haplotype clustering. *Am J Hum Genet*. 2007;81 5:1084-97. doi:10.1086/521987.
- 685 39. Browning BL and Browning SR. A fast, powerful method for detecting identity by  
686 descent. *Am J Hum Genet*. 2011;88 2:173-82. doi:10.1016/j.ajhg.2011.01.010.
- 687 40. Paradis E. pegas: an R package for population genetics with an integrated-modular  
688 approach. *Bioinformatics*. 2010;26 3:419-20. doi:10.1093/bioinformatics/btp696.

- 689 41. Price AL, Patterson NJ, Plenge RM, Weinblatt ME, Shadick NA and Reich D. Principal  
690 components analysis corrects for stratification in genome-wide association studies. *Nat*  
691 *Genet.* 2006;38 8:904-9. doi:10.1038/ng1847.
- 692 42. Voight BF, Kudravalli S, Wen X and Pritchard JK. A map of recent positive selection  
693 in the human genome. *PLoS Biol.* 2006;4 3:e72. doi:10.1371/journal.pbio.0040072.
- 694 43. Sabeti PC, Varilly P, Fry B, Lohmueller J, Hostetter E, Cotsapas C, et al. Genome-wide  
695 detection and characterization of positive selection in human populations. *Nature.*  
696 2007;449 7164:913-8. doi:10.1038/nature06250.
- 697 44. Szpiech ZA and Hernandez RD. selscan: An Efficient Multithreaded Program to  
698 Perform EHH-Based Scans for Positive Selection. *Molecular Biology & Evolution.*  
699 2014;31 10:2824-7.
- 700 45. Martin SH, Davey JW and Jiggins CD. Evaluating the use of ABBA-BABA statistics to  
701 locate introgressed loci. *Mol Biol Evol.* 2015;32 1:244-57. doi:10.1093/molbev/msu269.
- 702



703 **Figure legends**

704 **Fig. 1. Population relationship and structure.** (a) Neighbor-joining (NJ) tree based on an  
705 identity-by-state matrix among individuals. (b) Principal component analysis (PCA) of  
706 Chinese and European pigs. ECN, East Chinese pigs; NCN, North Chinese pigs; SCN, South  
707 Chinese pigs; SWCN, Southwest Chinese pigs; EUD, European domestic pigs. (c) NJ tree  
708 based on a Fst matrices among populations. (d) Population structure of Chinese and European  
709 pigs revealed by the ADMIXTURE analysis. MIN, Min pigs; HT, Hetao pigs; LWH, Laiwu  
710 pigs; EHL, Erhualian pigs; MS, Meishan pigs; JH, Jinhua pigs; GST, Tibetan pigs (gansu);  
711 SCT, Tibetan pigs (Sichuan); YNT, Tibetan pigs (Yunnan); TT, Tibetan pigs (Tibet); WZS,  
712 Wuzhishan pigs; LUC, Luchuan pigs; BMX, Bamaxiang pigs; XIANG, Xiang pigs; AWB,  
713 Asian wild boars; OUT, outgroup; EWB, European wild boars; HMP, Hampshire; DU, Duroc;  
714 LR, Landrace; PI, Pietrain; WDU, White Duroc; WLW, Dutch Large White pigs; KLW,  
715 Korea Large White pigs; FLW, French Large White pigs.

716

717 **Fig. 2. Introgressed Chinese haplotypes in French Large White pigs.** (a) Manhattan plot  
718 of rIBD values between French Large White (FLW) and South Chinese (SCN) pigs (positive  
719 value) or European wild boars (EWB) (negative value). The red dashed line indicates the top  
720 5% significance threshold. (b) Manhattan plot of rIBD values between FLW and East  
721 Chinese (ECN) pigs (positive value) or EWB (negative value). (c) Venn diagram of  
722 introgressed DNA (50 Kb windows) from SCN and ECN pigs in FLW pigs. (d) Venn  
723 diagram of genes in the introgressed regions from SCN and ECN pigs in FLW pigs. (e)  
724 Significantly enriched GO processes and KEGG pathways of introgressed genes in the  
725 introgressed regions from SCN and ECN pigs under selection in FLW pigs.

726

727 **Fig. 3. Introgression at the *GOLMI-NAA35* locus.** (a) rIBD values in a 2-Mb region  
728 harboring the *GOLMI-NAA35* gene. The brown dashed line indicates the 5% threshold line,  
729 and the *GOLMI-NAA35* region is indicated by grey dashed lines. (b) Genetic differentiation  
730 index ( $F_{ST}$ ) between French Large White (FLW) and European wild boar (EWB) or South  
731 Chinese (SCN) pigs. (c) Haplotype heatmap in the *GOLMI-NAA35* region. Major and minor  
732 alleles in FLW pigs are indicated by beige and light blue, respectively. (d) Haplotype  
733 network in the *GOLMI-NAA35* region. Each circle represents a haplotype, and the size of the  
734 circle is proportion to the haplotype frequency. The line width and length represent the  
735 difference between haplotypes. Different colors represent pigs from different geographical  
736 regions. OUT, outgroup; SWCN, Southwest Chinese pigs; NCN, North Chinese pigs; AWB,  
737 Asian (Chinese) wild boars; ECN, East Chinese pigs; EUD, European domestic pigs. (e)  
738 Selection signals in the *GOLMI-NAA35* region unraveled by the XP-EHH analysis between  
739 FLW and other Large White pigs. The brown dashed line indicates the 5% threshold line. (f)  
740 Serum interleukin 6 (IL-6) contents of FLW pigs homozygous (QQ) or heterozygous (Qq) for  
741 the introgressed *GOLMI-NAA35* haplotypes. Student's t-test was employed to compute the  
742 *P*-value ( $P = 0.015$ ).

743

744 **Fig. 4. Introgression at the *KATNAL1* locus.** (a) rIBD values in a 2-Mb region  
745 encompassing the *KATNAL1* gene. The brown dashed line indicates the 5% threshold line,  
746 and the *KATNAL1* region is indicated by grey dashed lines. (b) Genetic differentiation index  
747 ( $F_{ST}$ ) between French Large White (FLW) and European wild boar (EWB) or East Chinese  
748 (ECN) pigs. (c) Haplotype heatmap in the *KATNAL1* region. Major and minor alleles in FLW  
749 pigs are indicated by beige and light blue, respectively. (d) Haplotype network in the  
750 *KATNAL1* region. The legend is the same as in Figure 3. (e) Selection signals unraveled by  
751 the XP-EHH analysis between FLW and other Large White pigs. The brown dashed line

752 indicates the 5% threshold line. **(f)** Estimated breeding values for total number of piglets born  
753 (TNB EBV) of FLW sows that mated with FLW boars homozygous (QQ) or heterozygous  
754 (Qq) for the introgressed haplotypes. Student's t-test was employed to compute the *P*-value  
755 ( $P = 0.036$ ).

756

757 **Fig. 5. Archaic introgression at the *AHR* locus.** **(a)** Haplotype heatmap in a 150-kb region  
758 on chromosome 9 (SSC9: 95.5-95.65 Mb). The *AHR* region is indicated by a red box. Major  
759 and minor alleles in FLW pigs are indicated by beige and light blue, respectively. **(b)** *AHR*  
760 haplotype network. Each pie chart represents one unique haplotype, and the radius of the pie  
761 chart is proportional to the five times of  $\log_{10}$ (number of chromosomes with that haplotype).  
762 The width and length of the edges are proportional to the  $\log_2$ (number of pairwise differences  
763 between the joined haplotypes) plus one, and the thinnest edge represents a difference of one  
764 mutation. Three different background colors represent three different haplotype groups.  
765 Different colors represent pigs from different geographical regions. The full names of pig  
766 codes are given in the legend of Figure 3. **(c)** Haplotype difference between each *AHR*  
767 haplotype. **(d)** Distribution of the potential archaic SNPs. At these SNPs, the frequency  
768 difference between Erhualian and Chinese wild boars is greater than 0.45, and that between  
769 Erhualian pigs and outgroup animals is less than 0.1. The x-axis shows the ratio of the  
770 potential archaic SNPs in each 50-kb window, and the y-axis indicates the number of  
771 windows. The red line marks the the ratio of the potential archaic SNPs in the window  
772 harboring the *AHR* gene. **(e)** Distribution of gene flow ( $f_D$ ) and nucleotide distance ( $D_{xy}$ )  
773 statistics within nonoverlapping 50-kb windows across the genome.  $D_{xy}$  values between  
774 Erhualian pigs and Chinese wild boars are shown in the x-axis and  $f_D$  in the y-axis. The red  
775 dot, an extreme outlier, represents the window in which the *AHR* gene is located. **(f)** French  
776 Large White sows carrying the homozygous archaic *AHR* haplotype show significantly ( $P =$

777  $2.39 \times 10^{-5}$ ) lower estimated breeding values for total number born EBV (TNB\_EBV),  
778 compared with those who do not carry the archaic haplotype. (g) Erhualian sows  
779 homozygously carrying the archaic haplotype (QQ) have higher ( $P = 0.0096$ ) TNB\_EBV  
780 than heterozygous carriers (qq).

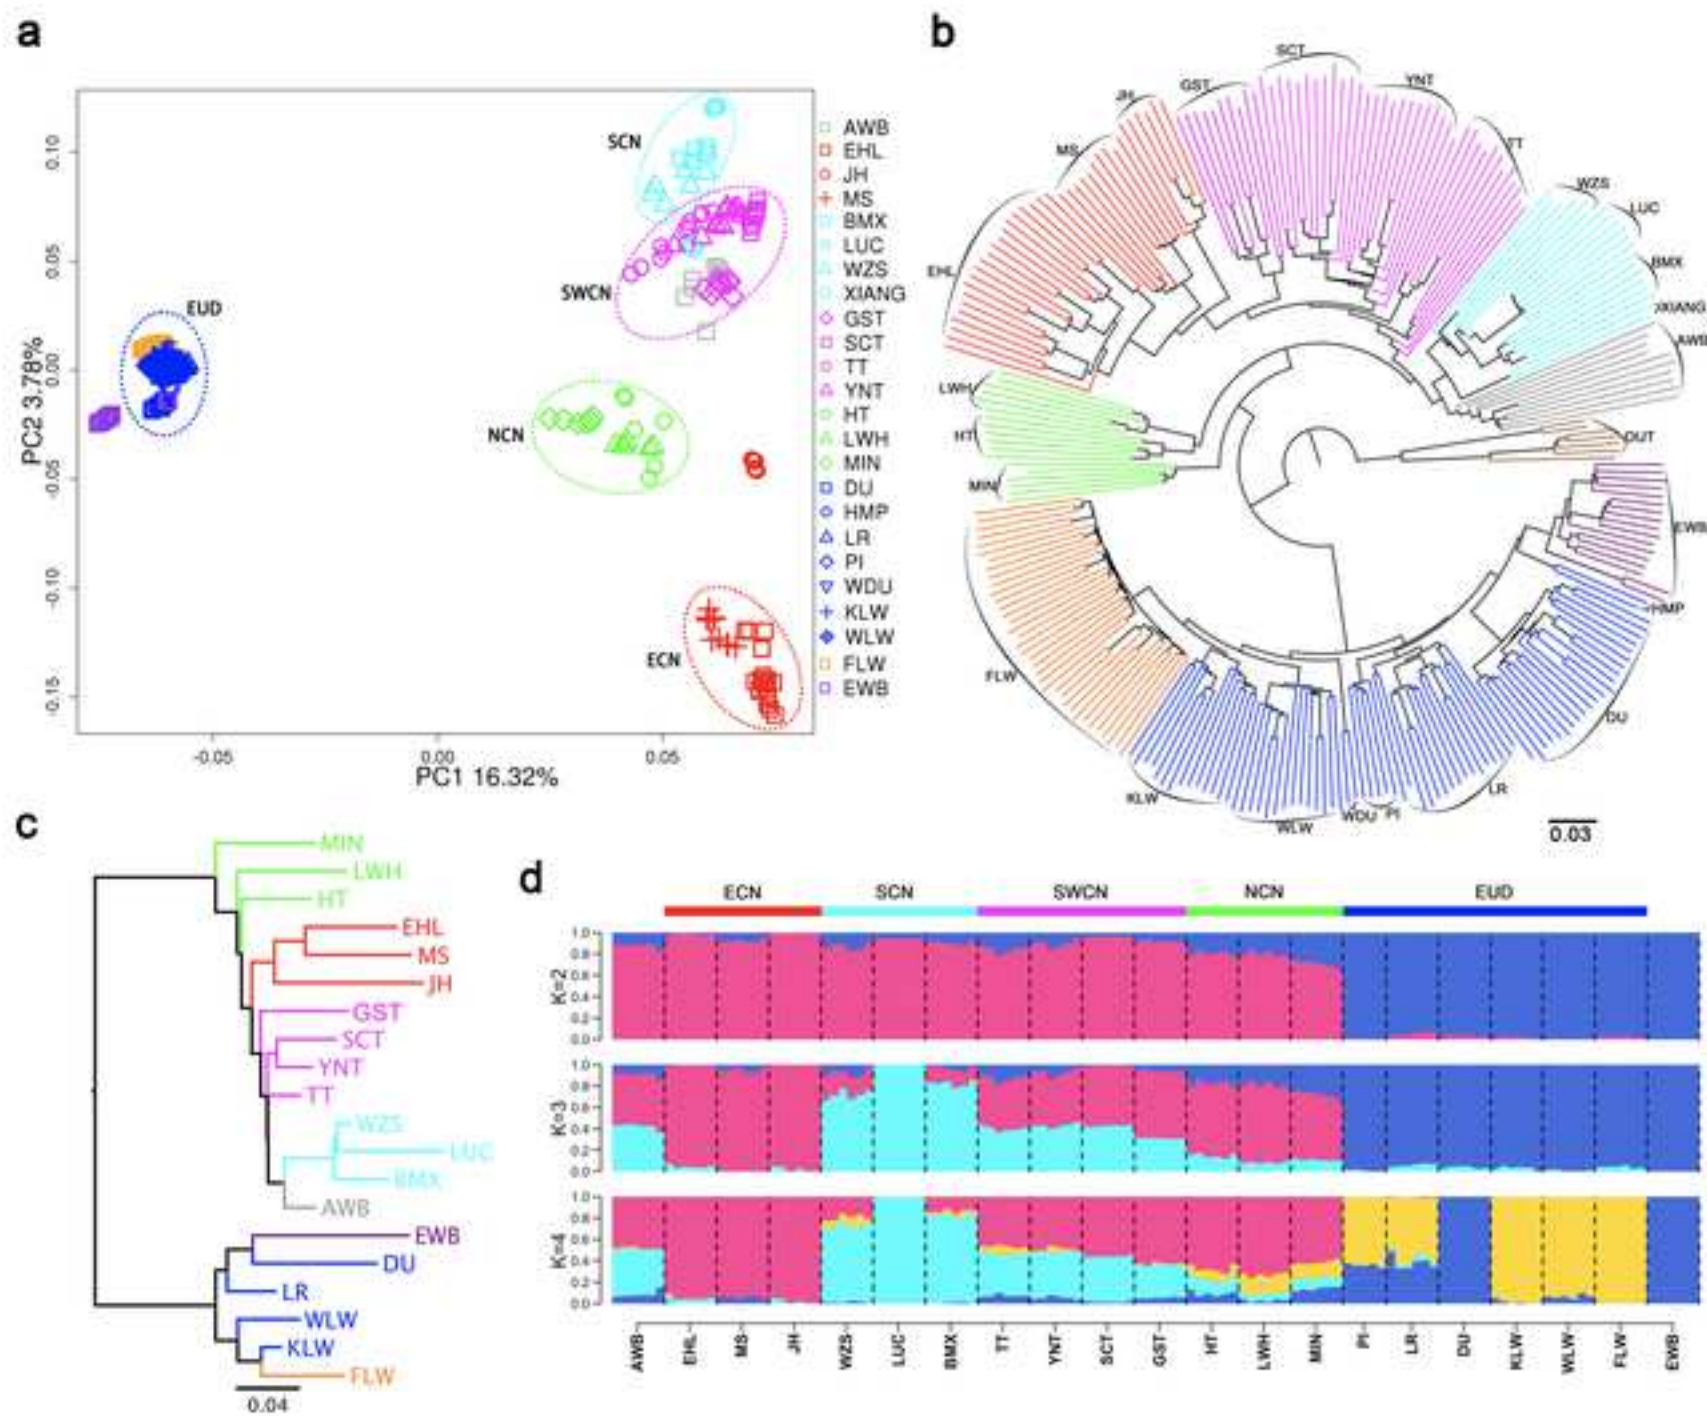

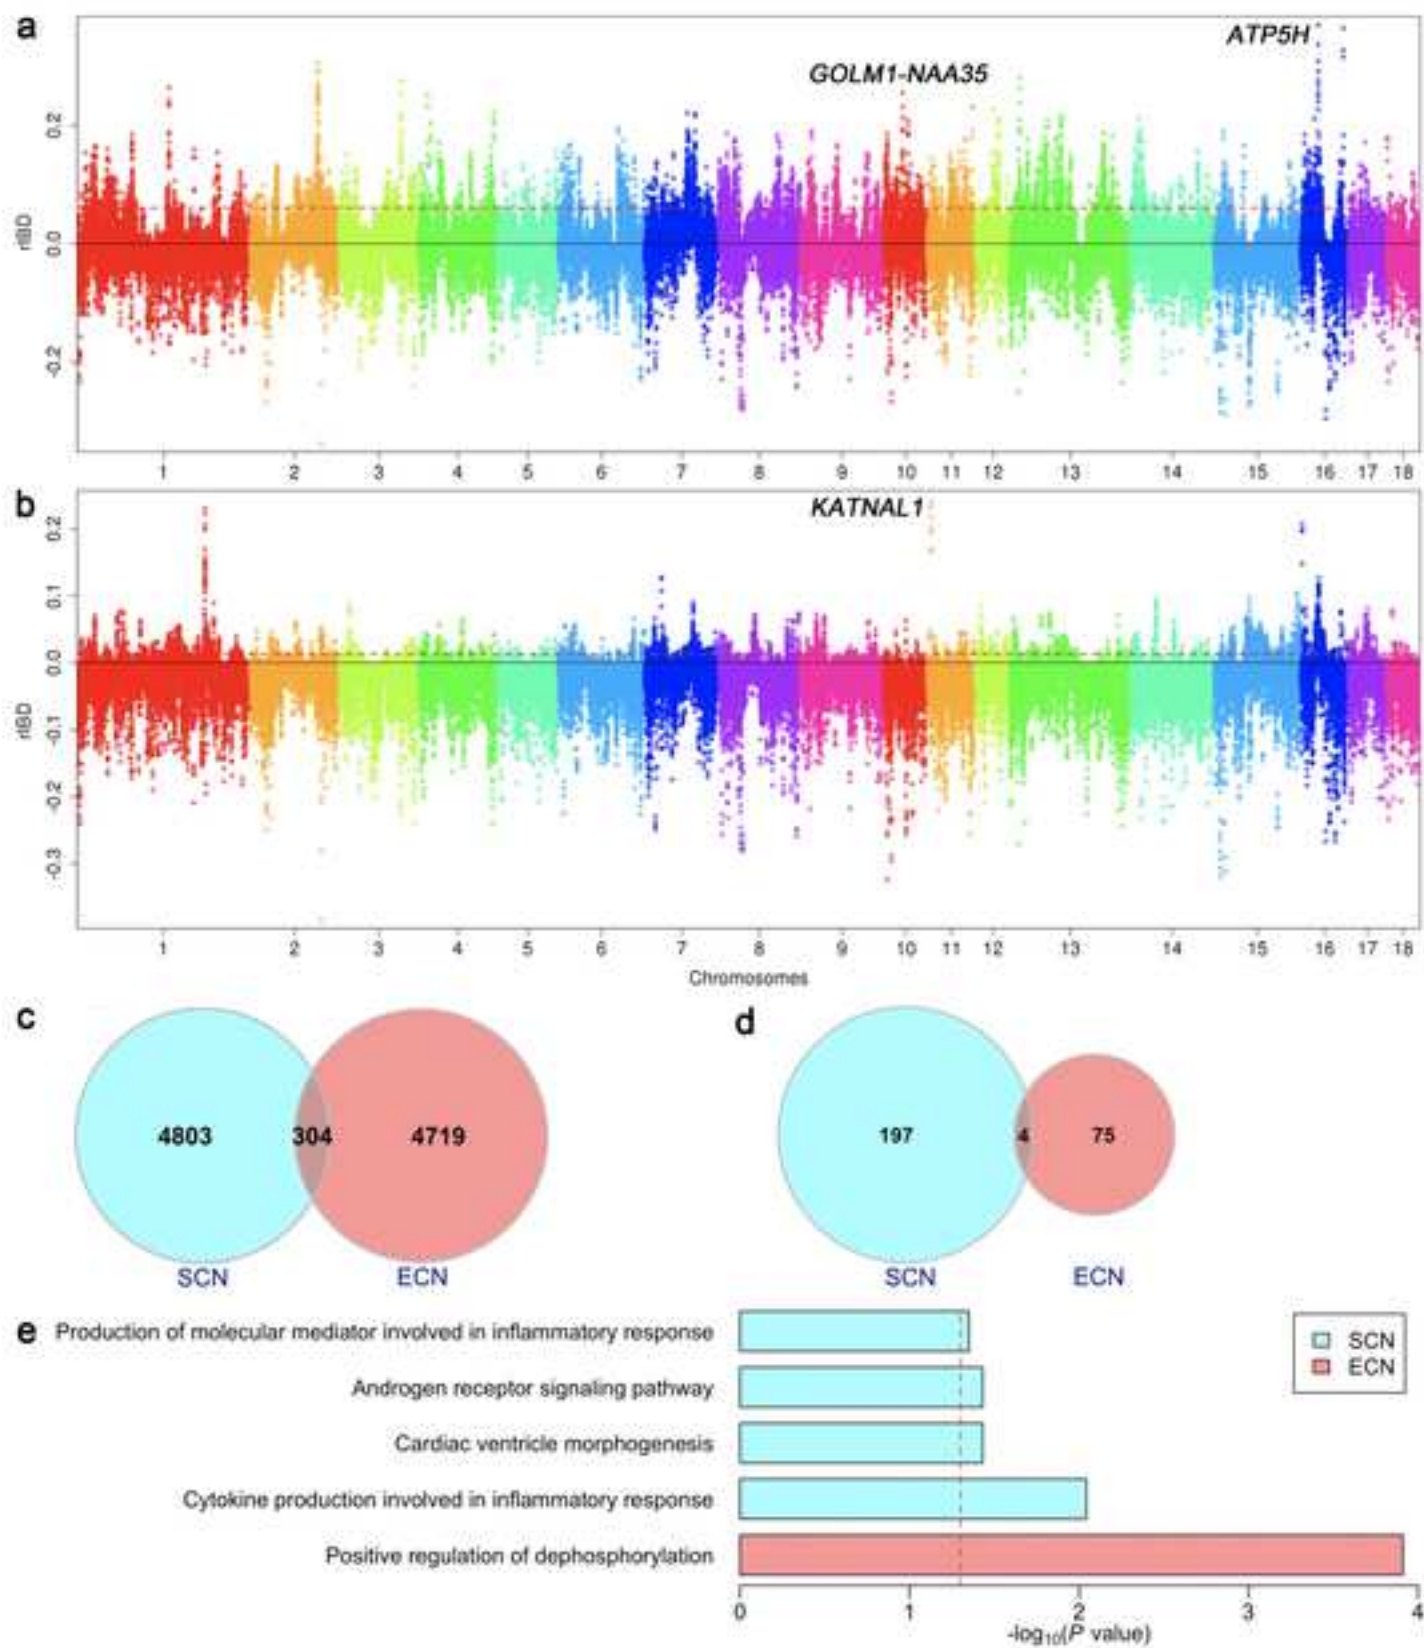



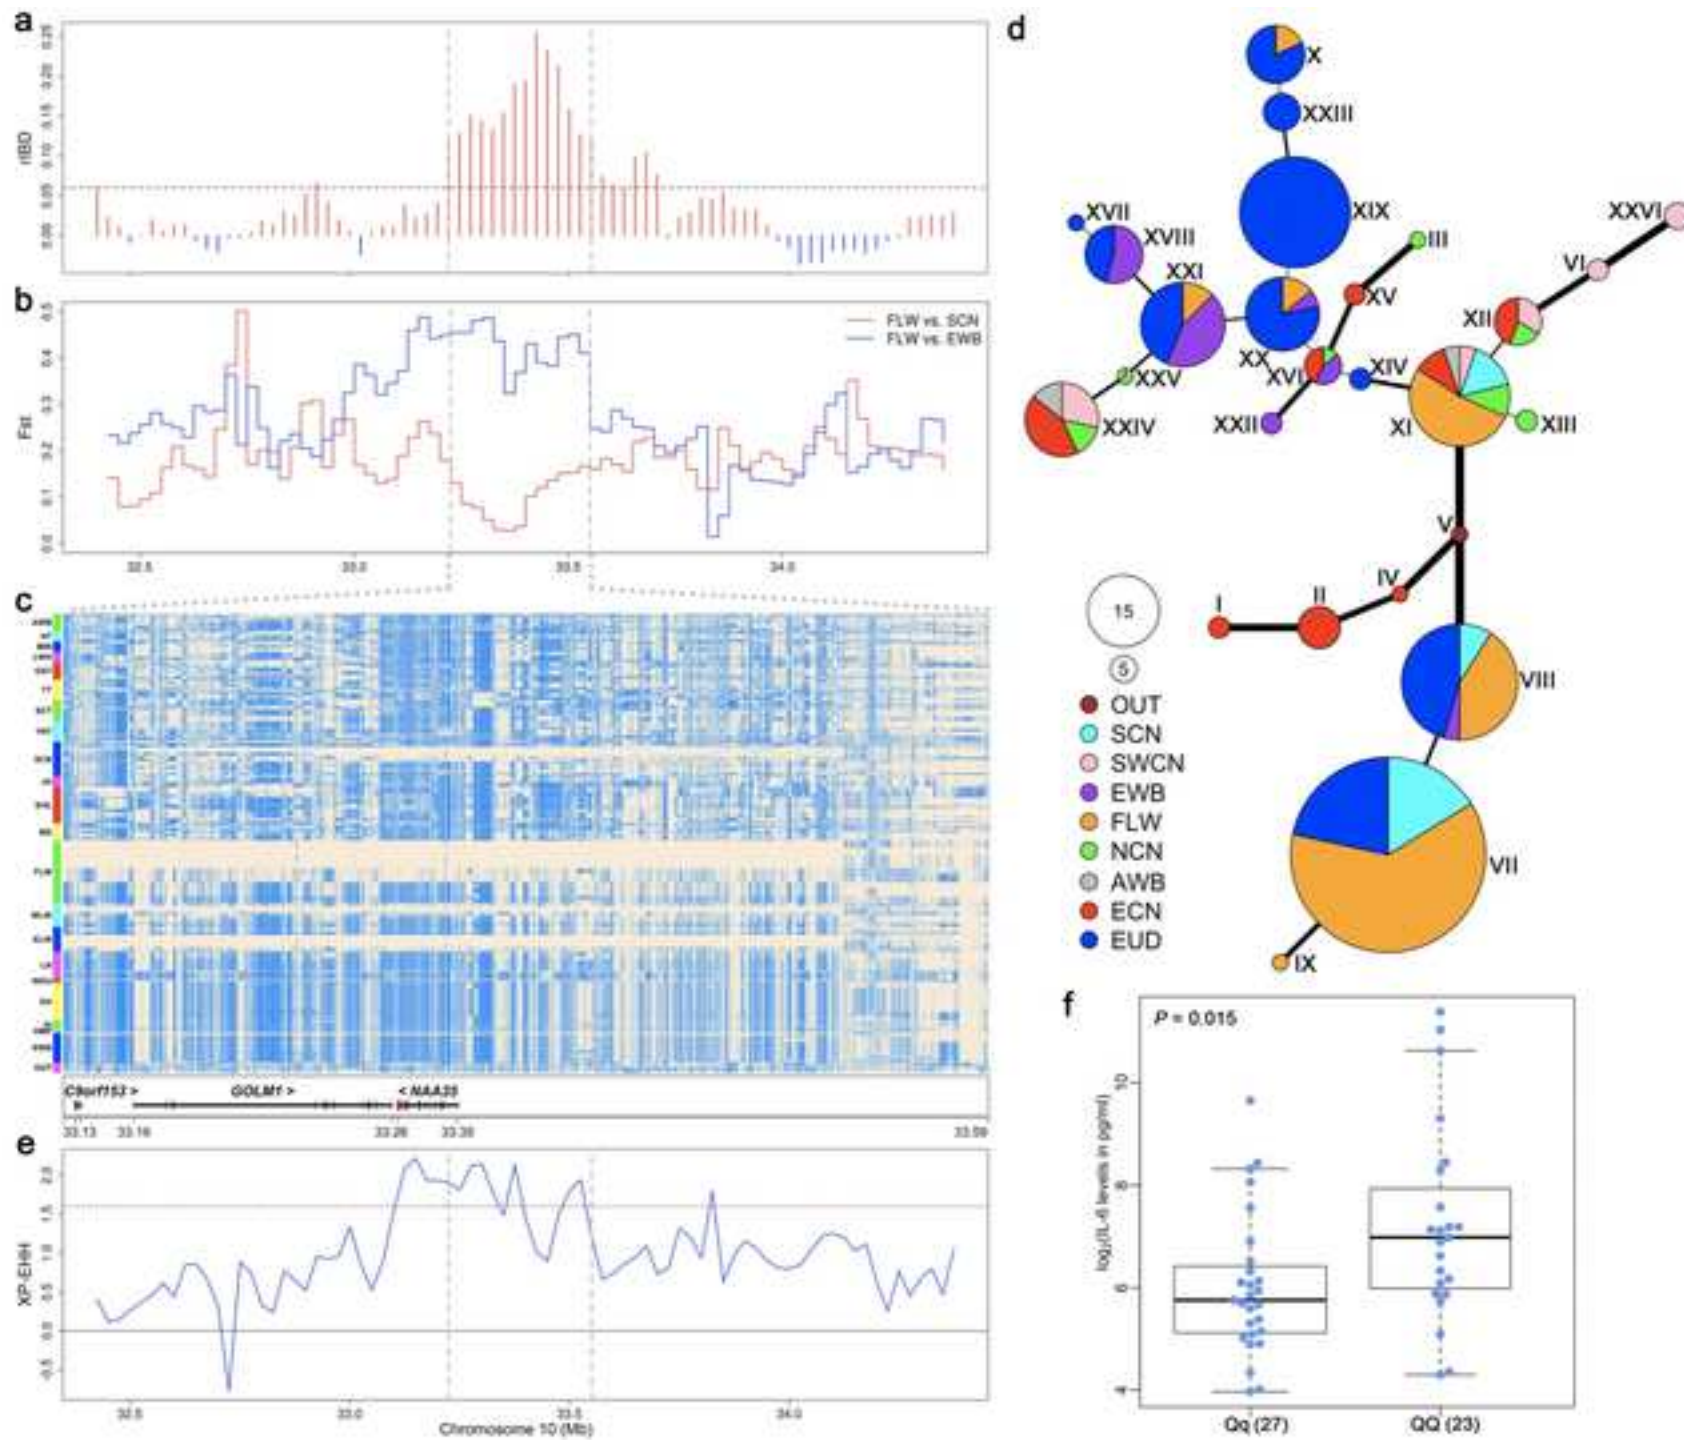

Figure 4

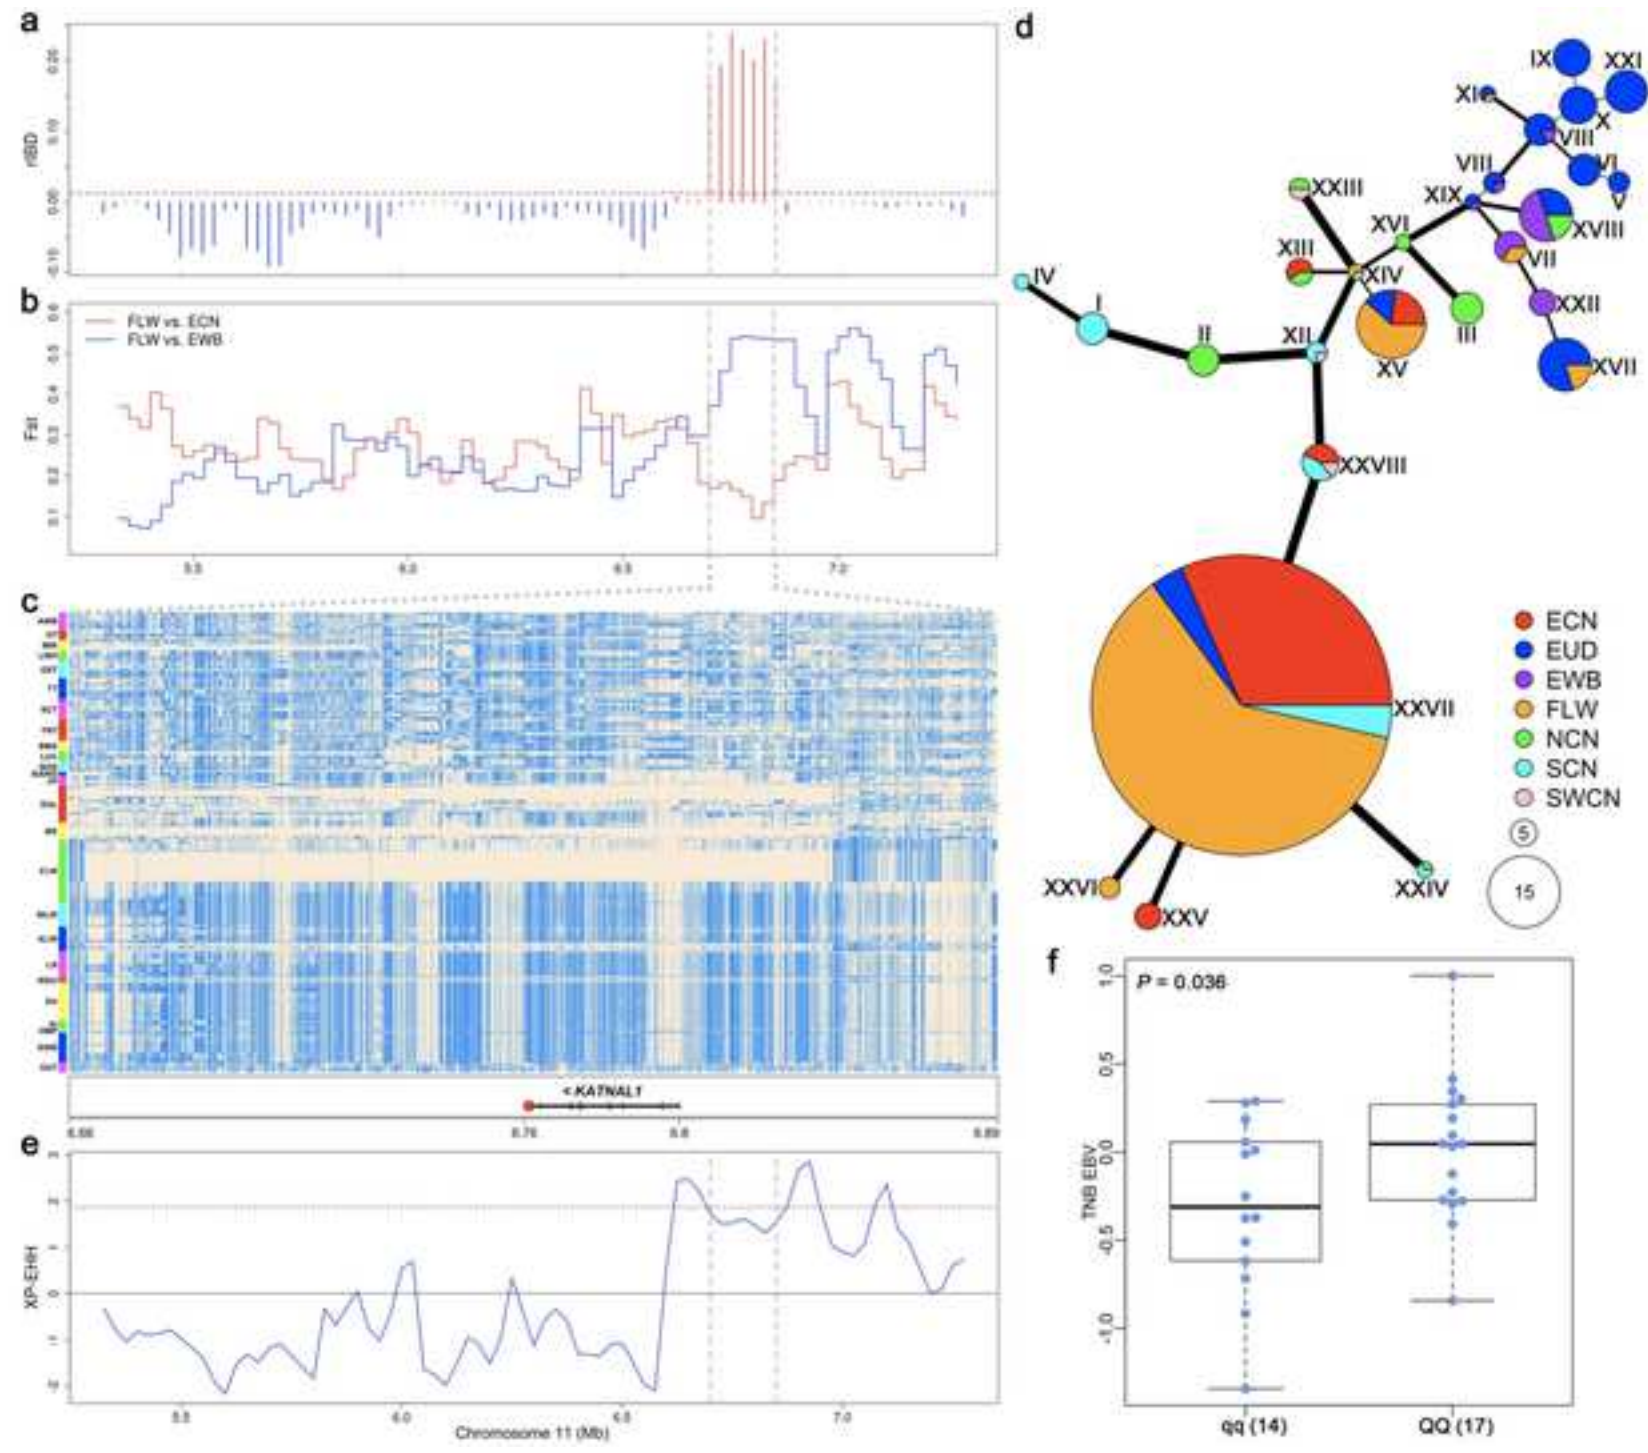



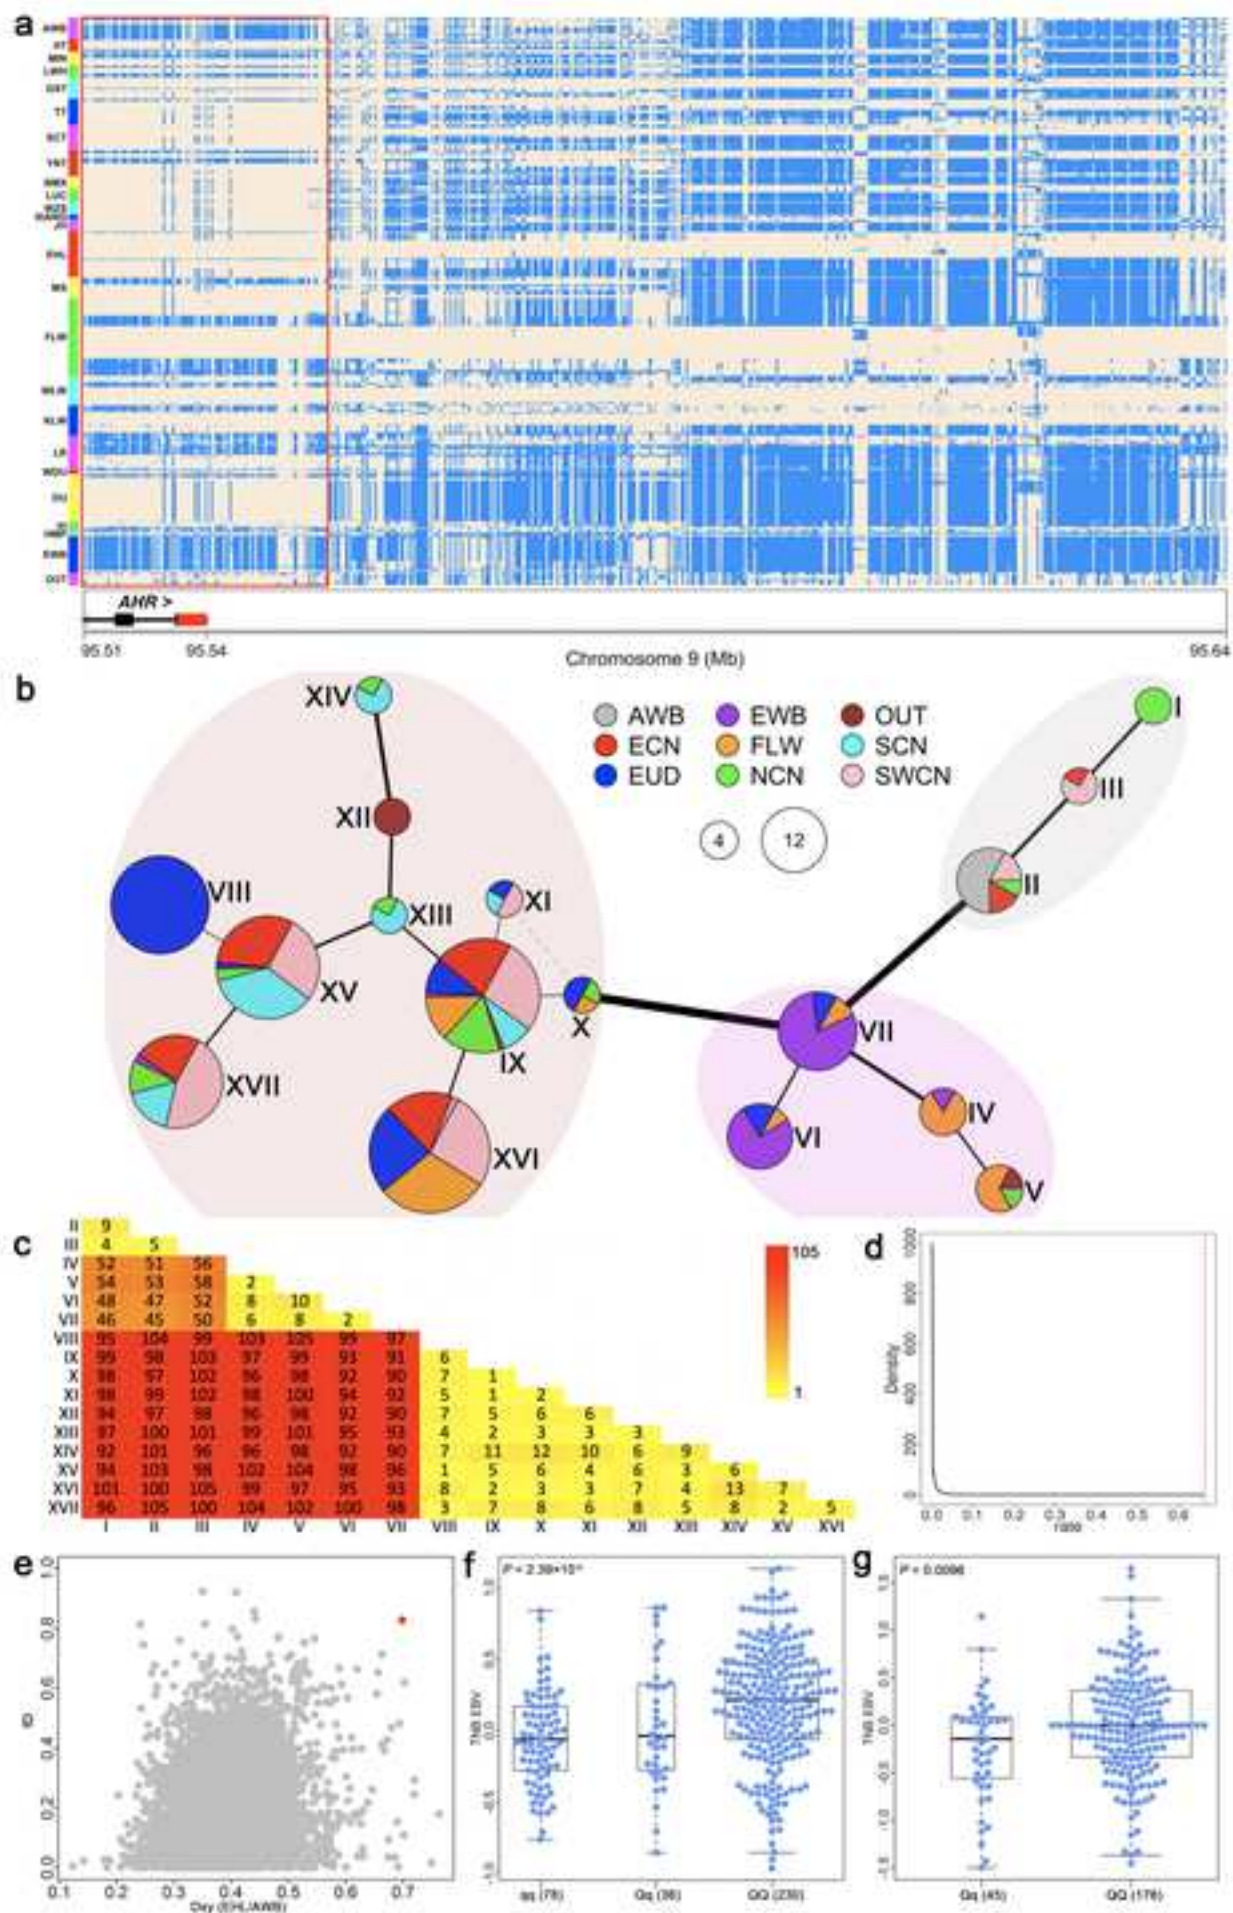

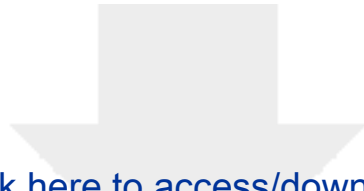

Click here to access/download  
**Supplementary Material**  
Supplementary Information.docx

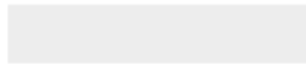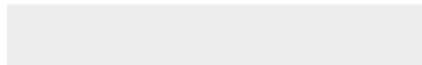

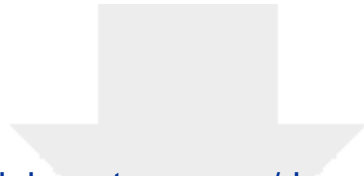

Click here to access/download  
**Supplementary Material**  
Supplementary Table 6.xlsx

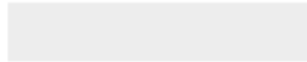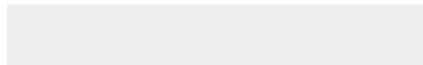



Click here to access/download  
**Supplementary Material**  
Supplementary Table 7.xlsx



Supplement: giaa014_giga-d-19-00160_original_submission.pdf [file giaa014_giga-d-19-00160_original_submission.pdf]
