# Supplementary material for: Introgression of Eastern Chinese and Southern Chinese haplotypes contributes to the improvement of fertility and immunity in European modern pigs
Source: PubMed Central journal article supplement (PMC7059266; doi:10.1093/gigascience/giaa014), 2020-03-06

## Introgression of Eastern Chinese and Southern Chinese haplotypes contributes to the improvement of fertility and immunity in European modern pigs

--Manuscript Draft--

|                                                      |                                                                                                                                                                                                                                                                                                                                                                                                                                                                                                                                                                                                                                                                                                                                                                                                                                                                                                                                                                                                                                                                                                                                                                                                                                                                                          |               |
|------------------------------------------------------|------------------------------------------------------------------------------------------------------------------------------------------------------------------------------------------------------------------------------------------------------------------------------------------------------------------------------------------------------------------------------------------------------------------------------------------------------------------------------------------------------------------------------------------------------------------------------------------------------------------------------------------------------------------------------------------------------------------------------------------------------------------------------------------------------------------------------------------------------------------------------------------------------------------------------------------------------------------------------------------------------------------------------------------------------------------------------------------------------------------------------------------------------------------------------------------------------------------------------------------------------------------------------------------|---------------|
| <b>Manuscript Number:</b>                            | GIGA-D-19-00160R2                                                                                                                                                                                                                                                                                                                                                                                                                                                                                                                                                                                                                                                                                                                                                                                                                                                                                                                                                                                                                                                                                                                                                                                                                                                                        |               |
| <b>Full Title:</b>                                   | Introgression of Eastern Chinese and Southern Chinese haplotypes contributes to the improvement of fertility and immunity in European modern pigs                                                                                                                                                                                                                                                                                                                                                                                                                                                                                                                                                                                                                                                                                                                                                                                                                                                                                                                                                                                                                                                                                                                                        |               |
| <b>Article Type:</b>                                 | Research                                                                                                                                                                                                                                                                                                                                                                                                                                                                                                                                                                                                                                                                                                                                                                                                                                                                                                                                                                                                                                                                                                                                                                                                                                                                                 |               |
| <b>Funding Information:</b>                          | National Natural Science Foundation of China (31525023)                                                                                                                                                                                                                                                                                                                                                                                                                                                                                                                                                                                                                                                                                                                                                                                                                                                                                                                                                                                                                                                                                                                                                                                                                                  | Prof. Jun Ren |
|                                                      | National Key Research Project of China (2016ZX08006-5)                                                                                                                                                                                                                                                                                                                                                                                                                                                                                                                                                                                                                                                                                                                                                                                                                                                                                                                                                                                                                                                                                                                                                                                                                                   | Prof. Jun Ren |
| <b>Abstract:</b>                                     | <p>Pigs were domesticated independently from European and Asian wild boars nearly 10,000 years ago. Chinese indigenous pigs have been historically introduced to improve Europe local pigs. However, the geographic origin and biological functions of introgressed Chinese genes in modern European pig breeds remain largely unknown. Here we explored whole-genome sequencing data from 266 Eurasian wild boars and domestic pigs to produce a fine-scale map of introgression between French Large White (FLW) and Chinese pigs. We show that FLW pigs had historical admixture with both Southern Chinese (SCN) and Eastern Chinese (ECN) pigs approximately 200–300 years ago. Moreover, a set of SCN haplotypes was shown to be beneficial for improving disease resistance and those with ECN haplotypes are favorable for improved reproductive performance in FLW pigs. In addition, we confirm human-mediated introgression events at the AHR locus, at which the haplotype of most likely ECN origin contributes to increased fertility of FLW pigs. This study advances our understanding of the breeding history of global domestic pigs and highlights the importance of artificial introgression in the formation of phenotypic characteristics in domestic animals.</p> |               |
| <b>Corresponding Author:</b>                         | Jun Ren<br><br>CHINA                                                                                                                                                                                                                                                                                                                                                                                                                                                                                                                                                                                                                                                                                                                                                                                                                                                                                                                                                                                                                                                                                                                                                                                                                                                                     |               |
| <b>Corresponding Author Secondary Information:</b>   |                                                                                                                                                                                                                                                                                                                                                                                                                                                                                                                                                                                                                                                                                                                                                                                                                                                                                                                                                                                                                                                                                                                                                                                                                                                                                          |               |
| <b>Corresponding Author's Institution:</b>           |                                                                                                                                                                                                                                                                                                                                                                                                                                                                                                                                                                                                                                                                                                                                                                                                                                                                                                                                                                                                                                                                                                                                                                                                                                                                                          |               |
| <b>Corresponding Author's Secondary Institution:</b> |                                                                                                                                                                                                                                                                                                                                                                                                                                                                                                                                                                                                                                                                                                                                                                                                                                                                                                                                                                                                                                                                                                                                                                                                                                                                                          |               |
| <b>First Author:</b>                                 | Hao Chen                                                                                                                                                                                                                                                                                                                                                                                                                                                                                                                                                                                                                                                                                                                                                                                                                                                                                                                                                                                                                                                                                                                                                                                                                                                                                 |               |
| <b>First Author Secondary Information:</b>           |                                                                                                                                                                                                                                                                                                                                                                                                                                                                                                                                                                                                                                                                                                                                                                                                                                                                                                                                                                                                                                                                                                                                                                                                                                                                                          |               |
| <b>Order of Authors:</b>                             | Hao Chen                                                                                                                                                                                                                                                                                                                                                                                                                                                                                                                                                                                                                                                                                                                                                                                                                                                                                                                                                                                                                                                                                                                                                                                                                                                                                 |               |
|                                                      | Min Huang                                                                                                                                                                                                                                                                                                                                                                                                                                                                                                                                                                                                                                                                                                                                                                                                                                                                                                                                                                                                                                                                                                                                                                                                                                                                                |               |
|                                                      | Bin Yang                                                                                                                                                                                                                                                                                                                                                                                                                                                                                                                                                                                                                                                                                                                                                                                                                                                                                                                                                                                                                                                                                                                                                                                                                                                                                 |               |
|                                                      | Zhongping Wu                                                                                                                                                                                                                                                                                                                                                                                                                                                                                                                                                                                                                                                                                                                                                                                                                                                                                                                                                                                                                                                                                                                                                                                                                                                                             |               |
|                                                      | Zheng Deng                                                                                                                                                                                                                                                                                                                                                                                                                                                                                                                                                                                                                                                                                                                                                                                                                                                                                                                                                                                                                                                                                                                                                                                                                                                                               |               |
|                                                      | Yong Hou                                                                                                                                                                                                                                                                                                                                                                                                                                                                                                                                                                                                                                                                                                                                                                                                                                                                                                                                                                                                                                                                                                                                                                                                                                                                                 |               |
|                                                      | Jun Ren                                                                                                                                                                                                                                                                                                                                                                                                                                                                                                                                                                                                                                                                                                                                                                                                                                                                                                                                                                                                                                                                                                                                                                                                                                                                                  |               |
|                                                      | Lusheng Huang                                                                                                                                                                                                                                                                                                                                                                                                                                                                                                                                                                                                                                                                                                                                                                                                                                                                                                                                                                                                                                                                                                                                                                                                                                                                            |               |
| <b>Order of Authors Secondary Information:</b>       |                                                                                                                                                                                                                                                                                                                                                                                                                                                                                                                                                                                                                                                                                                                                                                                                                                                                                                                                                                                                                                                                                                                                                                                                                                                                                          |               |
| <b>Response to Reviewers:</b>                        | Dear Dr. Hongling Zhou,                                                                                                                                                                                                                                                                                                                                                                                                                                                                                                                                                                                                                                                                                                                                                                                                                                                                                                                                                                                                                                                                                                                                                                                                                                                                  |               |

Thank you for giving us the opportunity to further revise our manuscript entitled "Population genomic data reveal origin and phenotypic effect of Chinese haplotypes introgressed into European modern pigs" (GIGA-D-19-00160.R1). We are grateful to the reviewer's constructive comments that help us to improve this manuscript. According to the reviewer's suggestions, we explored a new data set retaining all informative SNPs to reanalyze the AHR region. The results are in agreement with the reviewer's assumption that interspecies hybridization most likely did not occur at this locus. For details, please see the point-to-point respond to the reviewer's comments. We revised the manuscript accordingly and now submit it to your journal. We sincerely hope that the revised manuscript would satisfy you and the reviewer. Your consideration of acceptance for publication will be greatly appreciated. Thanks again for your kind help and effort to our work. Please do not hesitate to contact me if you have any other questions or comments.

Best regards,  
Jun Ren

Respond to Reviewers:

The manuscript has certainly improved compare to the previous version. I do like the overall paper and would like to see it published, however I feel some of my criticisms were not accurately dealt with. I will expand a bit on these to clarify what I meant and how they could help to improve the manuscript.

Respond: Thank you for your positive comment on the improvement of our manuscript. We greatly appreciate your further comments that enabled us to improve this paper.

-Looking at Figure 2a, the mean of the rIBD seems centered around 0. What I would conclude from that is that the majority of the genomes of FLW contains equal contributions from SCN and EWB, and indeed 'a positive rIBD indicated potential introgression' (line 486-487). I find it surprising that such a large part of the FLW genomes contains this high SCN signature. Looking at the different panels in Fig1 I don't see evidence of such high haplotype sharing. Could it be that the distribution is Z-transformed? If not, what would be your explanation of the rIBD value centered around 0 for figure 2a? Could you discuss this in the manuscript as well?

Respond: To address this concern, we carefully checked the statistical data and made a close examination on the introgression signals between FLW and SCN, and on those between FLW and EWB. Although the Manhattan plot (Figure 2a) looks like roughly equal contributions from SCN and EWB to FLW genomes, the frequency distribution of rIBD values clearly show that FLW contains a larger fraction of EWB genomes than SCN genomes. We show the distribution plot as a supplementary figure (supplementary figure S4a in the manuscript). In this figure, the median and mean of rIBD values were -0.023 and -0.026. It should be mentioned that the distribution was not Z-transformed.

-I am still not convinced that the introgression at the AHR locus is coming from interspecies hybridization. I feel the data does not support that conclusion. I have two reasons to doubt this statement:

1) The clustering of a Chinese wild boar within the haplotype group of FLW at the AHR locus. This can be seen in Fig 5a, 5b, Supp12. In your response you argue that this is probably due to introgression from domestic pigs into wild boar, but there is no evidence provided that this is more likely than the haplotype (or a similar one) being present (be it at low frequency) in the Chinese wild boars. Please note also that the sampling of Chinese wild boar is rather low, and represents multiple locations in the wild, spanning a large geographical area. Therefore, only low haplotype frequencies within this group would be expected anyway.

2) Filtering for minor allele frequency >0.05 removed many OUT-specific alleles. If you remove all alleles that occur less than 25 times (when using 266 re-sequenced animals) the out-specific branch length is strongly reduced. This introduced a bias in your OUT animals towards ancestral alleles that are present in outgroup animals as

|                                                                                                                                                                                                                                                                                                        |                                                                                                                                                                                                                                                                                                                                                                                                                                                                                                                                                                                                                                                                                                                                                                                                                                                                                                                                                                                                                                                                                                                                                                                                                                                                                                                                                                                                                                                                                                                                                                                                                                                                                                                                                                                                                                                                                                                                                                                                                                                                                                                                                                                                                                                                                                                                                                                                                                                                                                                                                                                                                                                                                                                                                                                                                                                                                                                                                                                                                                                                                                                                                                                                                                                           |
|--------------------------------------------------------------------------------------------------------------------------------------------------------------------------------------------------------------------------------------------------------------------------------------------------------|-----------------------------------------------------------------------------------------------------------------------------------------------------------------------------------------------------------------------------------------------------------------------------------------------------------------------------------------------------------------------------------------------------------------------------------------------------------------------------------------------------------------------------------------------------------------------------------------------------------------------------------------------------------------------------------------------------------------------------------------------------------------------------------------------------------------------------------------------------------------------------------------------------------------------------------------------------------------------------------------------------------------------------------------------------------------------------------------------------------------------------------------------------------------------------------------------------------------------------------------------------------------------------------------------------------------------------------------------------------------------------------------------------------------------------------------------------------------------------------------------------------------------------------------------------------------------------------------------------------------------------------------------------------------------------------------------------------------------------------------------------------------------------------------------------------------------------------------------------------------------------------------------------------------------------------------------------------------------------------------------------------------------------------------------------------------------------------------------------------------------------------------------------------------------------------------------------------------------------------------------------------------------------------------------------------------------------------------------------------------------------------------------------------------------------------------------------------------------------------------------------------------------------------------------------------------------------------------------------------------------------------------------------------------------------------------------------------------------------------------------------------------------------------------------------------------------------------------------------------------------------------------------------------------------------------------------------------------------------------------------------------------------------------------------------------------------------------------------------------------------------------------------------------------------------------------------------------------------------------------------------------|
|                                                                                                                                                                                                                                                                                                        | <p>well as in sus scrofa. In line 318 you mention that the nucleotide differences between the XVI haplotype and OUT haplotypes are only 7, but I would really like to know the differences without a filter for minor allele frequency. I find it highly unlikely that all out species contain the exact same haplotype at this locus, since they diverged millions of years ago. Therefore, I believe this is an artefact of the filtering. Even though not filtering for MAF may introduce some false positive variants within your dataset, those results can provide valuable information of how distinct these haplotypes really are. Also note that ABBA-BABA tests rely on an excess of derived lineage-specific alleles, and when these are filtered out such proportions are distorted.</p> <p>I strongly suggest to redo the analysis at the AHR locus using a less stringent filtering on MAF, because of the unequal sampling in your dataset. Perhaps if you retain all alleles that are observed at least twice (so homozygous within one animal, or two heterozygotes) you already have a less biased view on the origin of the haplotypes at this locus. Your results indeed support Asian pig-derived haplotypes into FLW, and I think these results are worthwhile, but I would remove the conclusions about interspecies hybridization. If indeed interspecies hybridization occurred before introgression into FLW, could you reconstruct a scenario how this should have happened? Was the introgression directly into the domestic lineage, or into a wild ancestor of ECN?</p> <p>Respond: We are thankful to these constructive comments. According to your suggestions, we reanalyzed the AHR region using a new data set containing all SNPs that were observed at least twice in the 266 re-sequenced animals. The result is in agreement with your expectation. First, a number of OUT-specific alleles were added to this region (Figure 5a in the revision). Second, the most frequent haplotype (XVIII) appeared 99 times in the 266 sequenced individuals, including 30 FLW pigs, 24 Large White pigs from other countries, 17 Erhualian pigs, 26 Tibetan pigs and two Asian wild boars (Figure 5b in the revision). Last, the OUT-specific alleles increased the distance between this major haplotype and five OUT haplotypes XXVI, XXVII, XXVIII, IV and I from 7 to 11, 16 35, 31, 97, respectively (supplementary Figure 13 in the revision). Altogether, these findings support our conclusion of introgression of Asian (most likely East Chinese pigs) haplotypes into FLW pigs, but do not support our previous assumption of interspecies hybridization at the AHR locus. Hence, we removed the conclusion about interspecies hybridization from the manuscript and revised this manuscript accordingly. We highlight all corrections in red and show these new findings in the new version of Figure 5 and supplementary files in the revised manuscript.</p> <p>Minor comment:<br/>-In table S2 and S3 you have regions of potential introgression on chromosome 23, which doesn't exist in pigs. You probably mean the X-chromosome?</p> <p>Respond: Yes. We have changed “23” to “X” in the two tables.</p> |
| <b>Additional Information:</b>                                                                                                                                                                                                                                                                         |                                                                                                                                                                                                                                                                                                                                                                                                                                                                                                                                                                                                                                                                                                                                                                                                                                                                                                                                                                                                                                                                                                                                                                                                                                                                                                                                                                                                                                                                                                                                                                                                                                                                                                                                                                                                                                                                                                                                                                                                                                                                                                                                                                                                                                                                                                                                                                                                                                                                                                                                                                                                                                                                                                                                                                                                                                                                                                                                                                                                                                                                                                                                                                                                                                                           |
| <b>Question</b>                                                                                                                                                                                                                                                                                        | <b>Response</b>                                                                                                                                                                                                                                                                                                                                                                                                                                                                                                                                                                                                                                                                                                                                                                                                                                                                                                                                                                                                                                                                                                                                                                                                                                                                                                                                                                                                                                                                                                                                                                                                                                                                                                                                                                                                                                                                                                                                                                                                                                                                                                                                                                                                                                                                                                                                                                                                                                                                                                                                                                                                                                                                                                                                                                                                                                                                                                                                                                                                                                                                                                                                                                                                                                           |
| Are you submitting this manuscript to a special series or article collection?                                                                                                                                                                                                                          | No                                                                                                                                                                                                                                                                                                                                                                                                                                                                                                                                                                                                                                                                                                                                                                                                                                                                                                                                                                                                                                                                                                                                                                                                                                                                                                                                                                                                                                                                                                                                                                                                                                                                                                                                                                                                                                                                                                                                                                                                                                                                                                                                                                                                                                                                                                                                                                                                                                                                                                                                                                                                                                                                                                                                                                                                                                                                                                                                                                                                                                                                                                                                                                                                                                                        |
| <b>Experimental design and statistics</b>                                                                                                                                                                                                                                                              | Yes                                                                                                                                                                                                                                                                                                                                                                                                                                                                                                                                                                                                                                                                                                                                                                                                                                                                                                                                                                                                                                                                                                                                                                                                                                                                                                                                                                                                                                                                                                                                                                                                                                                                                                                                                                                                                                                                                                                                                                                                                                                                                                                                                                                                                                                                                                                                                                                                                                                                                                                                                                                                                                                                                                                                                                                                                                                                                                                                                                                                                                                                                                                                                                                                                                                       |
| <p>Full details of the experimental design and statistical methods used should be given in the Methods section, as detailed in our <a href="#">Minimum Standards Reporting Checklist</a>. Information essential to interpreting the data presented should be made available in the figure legends.</p> |                                                                                                                                                                                                                                                                                                                                                                                                                                                                                                                                                                                                                                                                                                                                                                                                                                                                                                                                                                                                                                                                                                                                                                                                                                                                                                                                                                                                                                                                                                                                                                                                                                                                                                                                                                                                                                                                                                                                                                                                                                                                                                                                                                                                                                                                                                                                                                                                                                                                                                                                                                                                                                                                                                                                                                                                                                                                                                                                                                                                                                                                                                                                                                                                                                                           |

|                                                                                                                                                                                                                                                                                                                                                                                                                                                                                                                                                         |                                                                                                                                                    |
|---------------------------------------------------------------------------------------------------------------------------------------------------------------------------------------------------------------------------------------------------------------------------------------------------------------------------------------------------------------------------------------------------------------------------------------------------------------------------------------------------------------------------------------------------------|----------------------------------------------------------------------------------------------------------------------------------------------------|
| <p>Have you included all the information requested in your manuscript?</p>                                                                                                                                                                                                                                                                                                                                                                                                                                                                              |                                                                                                                                                    |
| <p><b>Resources</b></p> <p>A description of all resources used, including antibodies, cell lines, animals and software tools, with enough information to allow them to be uniquely identified, should be included in the Methods section. Authors are strongly encouraged to cite <a href="#">Research Resource Identifiers</a> (RRIDs) for antibodies, model organisms and tools, where possible.</p> <p>Have you included the information requested as detailed in our <a href="#">Minimum Standards Reporting Checklist</a>?</p>                     | <p>Yes</p>                                                                                                                                         |
| <p><b>Availability of data and materials</b></p> <p>All datasets and code on which the conclusions of the paper rely must be either included in your submission or deposited in <a href="#">publicly available repositories</a> (where available and ethically appropriate), referencing such data using a unique identifier in the references and in the “Availability of Data and Materials” section of your manuscript.</p> <p>Have you have met the above requirement as detailed in our <a href="#">Minimum Standards Reporting Checklist</a>?</p> | <p>No</p>                                                                                                                                          |
| <p>If not, please give reasons for any omissions below.</p> <p>as follow-up to "<b>Availability of data and materials</b></p> <p>All datasets and code on which the conclusions of the paper rely must be either included in your submission or deposited in <a href="#">publicly available repositories</a></p>                                                                                                                                                                                                                                        | <p>All sequence data will be submitted to a publicly available repositories when this manuscript is acceptable for publication in GigaScience.</p> |

(where available and ethically appropriate), referencing such data using a unique identifier in the references and in the “Availability of Data and Materials” section of your manuscript.

Have you have met the above requirement as detailed in our [Minimum Standards Reporting Checklist?](#)

"

1 **Introgression of Eastern Chinese and Southern Chinese haplotypes**  
2 **contributes to the improvement of fertility and immunity in European**  
3 **modern pigs**

4  
5 Hao Chen<sup>§</sup>, Min Huang<sup>§</sup>, Bin Yang, Zhongping Wu, Zheng Deng, Yong Hou, Jun Ren<sup>\*†</sup>,  
6 Lusheng Huang<sup>\*</sup>

7  
8 State Key Laboratory of Pig Genetic Improvement and Production Technology, Jiangxi  
9 Agricultural University, Nanchang, P.R. China.

10

11

12 <sup>§</sup> Both authors contributed equally to this study and should be considered co-first authors

13

14 <sup>†</sup>Present address: College of Animal Science, South China Agricultural University, 510642,  
15 Guangzhou, P.R. China

16

17 **Correspondence author:** Jun Ren, Lusheng Huang

18 State Key Laboratory of Pig Genetic Improvement and Production Technology

19 Jiangxi Agricultural University

20 Nanchang 330045, P. R. China.

21 Phone: 0086-791-83805967; Fax: 0086-791-83900189;

22 E-mail: renjunxau@hotmail.com; [lushenghuang@hotmail.com](mailto:lushenghuang@hotmail.com)

23 ORCIDs:

24 Hao Chen: 0000-0002-5210-8924,

25 Min Huang: 0000-0001-9933-012X,

- 26 Bin Yang: 0000-0002-0689-0628,
- 27 Zhongping Wu: 0000-0001-5246-5190,
- 28 Yong Hou: 0000-0002-1351-9288,
- 29 Jun Ren: 0000-0001-6664-3998.

30 **Abstract**

31 Pigs were domesticated independently from European and Asian wild boars nearly 10,000  
32 years ago. Chinese indigenous pigs have been historically introduced to improve Europe local  
33 pigs. However, the geographic origin and biological functions of introgressed Chinese genes  
34 in modern European pig breeds remain largely unknown. Here we explored whole-genome  
35 sequencing data from 266 Eurasian wild boars and domestic pigs to produce a fine-scale map  
36 of introgression between French Large White (FLW) and Chinese pigs. We show that FLW  
37 pigs had historical admixture with both Southern Chinese (SCN) and Eastern Chinese (ECN)  
38 pigs approximately 200–300 years ago. Moreover, a set of SCN haplotypes was shown to be  
39 beneficial for improving disease resistance and those with ECN haplotypes are favorable for  
40 improved reproductive performance in FLW pigs. In addition, we confirm human-mediated  
41 introgression events at the *AHR* locus, at which the haplotype of most likely ECN origin  
42 contributes to increased fertility of FLW pigs. This study advances our understanding of the  
43 breeding history of global domestic pigs and highlights the importance of artificial  
44 introgression in the formation of phenotypic characteristics in domestic animals.



## 45 **Introduction**

46 Integrated genomic and archaeological evidence have illuminated the fact that the wild boar  
47 (*Sus scrofa*) originated in the Islands of Southeast Asia about 5 million years ago and then  
48 dispersed throughout Eurasia. Approximately 1 million years ago, geographic isolation caused  
49 by glacial events hampered the continuous gene flow among Eurasian wild boars, causing  
50 European and Asian wild boars to differentiate from each other [1-4]. About 10,000 years ago,  
51 European and Asian wild boars were domesticated independently in the Near East and China,  
52 respectively [3, 5, 6]. After long-term artificial selection and natural selection, abundant genetic  
53 resources of domestic pigs appeared in China, accounting for about one-third of global breeds  
54 [7, 8]. Chinese pigs are distributed in diverse geographic regions and have different breed  
55 features. For example, Erhualian (EHL) and Meishan pigs in East China are known for their  
56 prolificacy, with a litter size of more than 15, and for their thick skin. Luchuan (LUC) and  
57 Bama pigs in South China have inferior reproductive performance (8–10 piglets per parity),  
58 have thin skin and excellent heat resistance [7]. These pig breeds not only play a critical role  
59 in the Chinese pig industry, but also have contributed to the development of international  
60 commercial breeds, such as the Large White (LW) [9, 10].

61 Chinese pigs were introduced to Europe mainly during three historical periods [7]. From  
62 1685 to 1757, the Qing Dynasty set up four foreign trade ports: two in East China (Shanghai  
63 and Ningbo) and two (Zhangzhou and Guangzhou) in South China. Europe (especially England)  
64 had frequent trade with China through these four ports, mainly via the East India Company.  
65 This raises the possibility that Eastern Chinese (ECN) and Southern Chinese (SCN) pigs may  
66 have been transported to European countries during this period. From 1757 to 1841, only the  
67 Guangzhou port in South China was permitted access to foreign trade, and a ban was imposed  
68 on maritime trade or intercourse with foreign countries in 1757. It is well documented that SCN  
69 pigs had been introduced to England for the hybridization of local pigs during this period,

70 contributing to the formation of Berkshire [9] and LW pigs [10]. In 1978, the Chinese  
71 government launched the reform and open-door policy. Since then, ECN pigs, including  
72 Meishan, Jinhua, and Jiaxing Black, have been introduced into France, America, and Japan for  
73 the development of prolific synthetic lines [7].

74 Recently, whole-genome re-sequencing analysis has confirmed the human-mediated  
75 translocation of Chinese pigs into Europe that provided genetic variations for the selective  
76 breeding of modern commercial LW pigs [11]. However, it remains unknown if SCN or ECN  
77 pigs or both were introduced to Europe, because previous studies used a limited number of  
78 Chinese pigs from different locations as a whole population. French Large White (FLW) pigs  
79 are known for their excellent reproductive performance. A remarkable genetic improvement of  
80 litter size has been witnessed in FLW pigs over the past decades, but the molecular mechanisms  
81 underlying the fecundity remain unclear, although the fecundity is speculated to be related to  
82 the recent introgression of highly prolific Chinese pigs such as ECN pigs [7]. Further studies  
83 are required to test this speculation.

84 In this study, we explored whole-genome sequencing data of 266 Eurasian pigs to show that  
85 both SCN and ECN haplotypes were introgressed into LW pigs ~200–300 years ago. Some of  
86 the introgressed haplotypes have been under preferential selection to improve fertility and  
87 immunity in FLW pigs. For instance, the prolificacy-associated *AHR* haplotype was most likely  
88 introgressed from ECN pigs to FLW pigs through human-driven transportation. These findings  
89 advance our understanding of the breeding history and genetic mechanisms underlying breed  
90 characteristics of global domestic pigs.

91

## 92 **Results**

### 93 **Whole-genome sequencing data**

94 We obtained whole-genome sequencing data of 266 animals from 25 populations  
95 (**supplementary table S1**), including 36 highly prolific FLW pigs from the nucleus  
96 populations of two breeding companies. The 36 pigs were selected due to their total number  
97 born (TNB) piglets of more than 19 and distant genetic relationship between each individual  
98 (**supplementary fig. S1**). High-depth re-sequencing was conducted on a Hiseq 2000 or 2500  
99 sequencer (Illumina, USA). After filtering raw data (see Methods), we called 32.7 million  
100 single nucleotide polymorphisms (SNPs) from the 266 individuals. For the 28 LW pigs whose  
101 sequence data were retrieved from the public NCBI database (see Methods), we used the  
102 Illumina Porcine SNP60 chip [12] data set to identify their origin. We demonstrated that 14  
103 individuals belonged to the American Large White (ALW) lineage, and the other 14 individuals  
104 belonged to the Dutch Large White (NLW) line (**supplementary fig. S2**).

105

#### 106 **Genetic differentiation between SCN and ECN pigs**

107 Eurasian wild boars began to differentiate as early as ~1 million years ago [2, 3], and Chinese  
108 and European wild boars were independently domesticated about 10,000 years ago [1, 3]. The  
109 remarkable genetic differentiation between Chinese and Western pigs was reflected in the  
110 results from principal component analysis (PCA), phylogenetic analysis and admixture  
111 analysis (**fig. 1**). In our PCA analysis, the first principal component (PC1) accounted for 16.32%  
112 of the total eigenvalue, which clearly separated the Chinese pig from the Western pig. The  
113 second principal component (PC2) showed the differentiation among Chinese pigs, especially  
114 between SCN and ECN pigs (PC2 = 3.78%, **fig. 1a**). In a neighbor joining tree between  
115 individuals (**fig. 1b**) and populations (**fig. 1c**), Chinese and Western pigs defined two separate  
116 clades. For Chinese domestic pigs, SCN and ECN pigs formed two different branches. The  
117 clustering pattern was similar to the maximum likelihood tree revealed with TreeMix analysis,  
118 in which two Sumatras wild boars, one *Sus barbatus*, one *Sus verrucosus*, one *Sus cebifrons*,

119 one *Sus celebensis*, and one *Phacochoerus africanus* were treated as an outgroup (OUT), and  
120 the interpretation of the maximum likelihood tree reached 99.9% (**supplementary fig. S3**). In  
121 an admixture analysis, Chinese pigs and European pigs showed two distinct ancestral lineages  
122 when  $K = 2$ , although there were gene flows between the two groups, especially the North  
123 Chinese pig, that clearly mixed with European pig lineages, whereas LW (including FLW) pigs  
124 showed signatures of admixture with Chinese pigs. ECN pigs represented by Jinhua (JH) pigs  
125 and SCN pigs represented by Luchuan pigs appeared as the two ancestral lineages of Chinese  
126 pigs when  $K = 3$  (**fig. 1d**). Altogether, these findings not only confirmed the independent  
127 domestication of Chinese and European pigs, but also revealed that SCN pigs and ECN pigs  
128 have marked genetic differentiation and represent two ancient lineages of the Chinese domestic  
129 pig.

130

### 131 **SCN and ECN pigs were introgressed into Europe between 220 and 310 years ago**

132 To determine whether SCN and ECN pigs were introduced into Europe via human-mediated  
133 transportation, we performed relative identity-by-descent (rIBD) analysis using whole genome  
134 sequencing data (see Methods). We detected 5,107 and 5,024 50-kb regions with signatures of  
135 potential introgression from SCN (**supplementary table S2**) or ECN (**supplementary table**  
136 **S3**) pigs into FLW pigs, respectively (**figs. 2a and 2b, supplementary fig. S4**). The  
137 introgressed DNA from SCN and ECN pigs differed greatly in FLW pigs, with an overlap of  
138 only 6.0% introgression regions (**fig. 2c**) and 2.9% genes within these regions (**fig. 2d**). We  
139 thus performed Gene Ontology (GO) and Kyoto Encyclopedia of Genes and Genomes (KEGG)  
140 pathway enrichment analysis on the genes located in the introgressed regions. The genes within  
141 the regions of inferred introgression with SCN pigs and ECN pigs were enriched in the  
142 immune-related signaling and fertility pathways, respectively (**fig. 2e**). We further used  
143 ALDER software [13] to estimate the time of admixture between FLW and SCN or ECN pigs,

144 which yielded an estimate of  $53 \pm 9$  ( $265 \pm 45$  years) and  $54 \pm 9$  ( $270 \pm 45$  years) generations  
145 ago, respectively. This estimation was consistent with historical records stating that SCN pigs  
146 were deliberately transported to England at the onset of the first Industrial Revolution and  
147 contributed to the breeding of LW pigs [11]. In addition, these results supported our speculation  
148 that ECN pigs were also introduced into Europe to improve the productivity of local pigs  
149 between 1685 and 1757.

150

151 **The introgressed *GOLMI-NAA35* haplotype from SCN pigs has been under selection to**  
152 **enhance the disease resistance of FLW pigs**

153 We detected seven genomic regions with strong signatures of introgression from SCN pigs in  
154 the genomes of FLW pigs (rIBD value  $> 0.2$ ; **supplementary table S4**). Two adjacent genes  
155 (3,511 bp apart), *GOLMI* and *NAA35*, were located in one of these seven regions. The *GOLMI*  
156 gene encodes a type II Golgi transmembrane protein, which is mainly synthesized in the rough  
157 endoplasmic reticulum, assists in processing proteins in the Golgi and is responsive to viral  
158 infections [14]. In 2016, Li *et al.* [15] reported that the *GOLMI-NAA35* locus markedly  
159 modulated the cytokine interleukin-6 (IL-6) production by human immune cells in response to  
160 multiple pathogens. Given the important role of the *GOLMI-NAA35* locus in disease resistance,  
161 we chose this locus for further study.

162 We first made a close examination of the rIBD results for a 2-Mb region encompassing the  
163 *GOLMI-NAA35* locus (SSC10: 33.20–33.58 Mb on Sscrofa10.2 and 29.15–29.50 Mb on  
164 Sscrofa11.1). We found that the frequency of shared IBD haplotypes between FLW and SCN  
165 pigs at the *GOLMI-NAA35* locus was significantly higher than those in the surrounding regions  
166 (**fig. 3a**). Moreover, we observed remarkably elevated genetic differentiation ( $F_{ST}$ ) between  
167 FLW pigs and European wild boars, in contrast to the particularly decreased  $F_{ST}$  between FLW  
168 and SCN pigs in the *GOLMI-NAA35* region we observed (**fig. 3b**). In addition, there were four

169 main *GOLMI-NAA35* haplotypes in FLW pigs. Most individuals (32 out of 36) carried  
170 haplotypes similar to those of SCN pig (**fig. 3c**).

171 Next, we used 3,447 SNPs in the *GOLMI-NAA35* region to construct an NJ tree  
172 (**supplementary fig. S5**). We found that most FLW pigs (n = 32) clustered with SCN pigs to  
173 form a branch that was separated from ECN pigs and European pigs, whereas only a small  
174 number of FLW pigs (n = 4) clustered with European pigs, which was in stark contrast to a  
175 genome-wide NJ-tree (**fig. 1a**). We further constructed a haplotype network using 298 SNPs at  
176 the *GOLMI-NAA35* locus (**fig. 3d**). We clearly identified haplotype VII as being the main  
177 haplotype in FLW pigs, and this haplotype appeared 37 times in all populations, including 23  
178 times in FLW pigs, 8 times in LW pigs, and 6 times in SCN pigs. The SCN-major haplotype  
179 VIII and haplotype VII differed at only four different sites, whereas the unique haplotypes  
180 (XIX, XXIII and X) of European wild boars and haplotype VII differed at more than 180 sites  
181 (**supplementary fig. S6**). These results corroborate the historical introgression of SCN pigs  
182 into FLW pigs and illuminate that haplotype VII at the *GOLMI-NAA35* locus in FLW pigs  
183 originated from SCN pigs.

184 We noted that the introgressed haplotype VII was present in other LW pigs at low  
185 frequencies but was absent in other European domestic pigs. This was conceivable because all  
186 LW populations originated in England where SCN pigs were introduced during the first  
187 Industrial Revolution (early 19th century) [7]. Moreover, this introgressed haplotype appeared  
188 one time in European wild boars. Considering the outdoor grazing of early European pigs, we  
189 believe that European wild boars had admixture with European domestic pigs, after which this  
190 haplotype was introgressed from European domestic pigs into European wild boars.

191 The haplotype heatmap of the *GOLMI-NAA35* region shows that the SCN-originated  
192 haplotype VII was frequently present in FLW pigs (**fig. 3c**), which suggested that this haplotype  
193 may be selected for in FLW pigs. To verify this hypothesis, we first compared the linkage

194 disequilibrium (LD) values ( $r^2$ ) of the *GOLMI-NAA35* region and an upstream (3 Mb) region  
195 with the same size as the *GOLMI-NAA35* locus. We found that the LD level in the *GOLMI-*  
196 *NAA35* region of the FLW population ( $r_{0.3}^2 = 192.3$  kb) was significantly higher than that of all  
197 other populations (**supplementary fig. S7a**), whereas the LD value ( $r_{0.3}^2$ ) in the upstream  
198 region was only 17.3 kb, which was similar to most populations (**supplementary fig. S7b**).  
199 Subsequently, we performed LD analysis for 10,000 81.9-kb regions randomly sampled across  
200 the genomes of 36 FLW pigs (**supplementary fig. S7c**). We found that the LD value ( $r^2$ ) in  
201 the *GOLMI-NAA35* region ranked in the top 2.6% of the 10,000 bootstrap results, which was  
202 a significant outlier ( $P = 0.02$ ) and suggested that the introgressed *GOLMI-NAA35* haplotype  
203 likely underwent a preference selection in FLW pigs, resulting in a local increase of LD level  
204 in this target region. XP-EHH analysis also showed evidence of selection at the *GOLMI-*  
205 *NAA35* region in FLW pigs but not in other LW pigs (**fig. 3e**).

206 To examine whether the *GOLMI-NAA35* haplotypes were associated with serum IL-6  
207 content in FLW pigs, we collected venous blood from 54 healthy adult FLW sows at the same  
208 physiological stage and determined the IL-6 levels in the serum of each individual using an  
209 enzyme-linked immunoassay (ELISA) (**supplementary table S5**). Meanwhile, we defined the  
210 *GOLMI-NAA35* haplotypes for each individual using two tag SNPs and then tested the  
211 association between these haplotypes and IL-6 content. We found that individuals  
212 homozygously carrying the introgressed haplotype (*QQ*) had significantly higher IL-6  
213 concentrations than heterozygotes individuals (*Qq*) ( $P = 0.015$ , **fig. 3f**). Altogether, a sensible  
214 explanation for the introgression at the *GOLMI-NAA35* locus is that the *GOLMI-NAA35*  
215 haplotype was historically introgressed from SCN pigs into LW pigs and then has been under  
216 preferential selection to improve the effective production of IL-6 in response to pathogens and  
217 consequently enhance the resistance to infectious disease of FLW pigs.

218 Historically, South China was renowned as a land of plague with a humid and stuffy  
219 environment. It was notorious for local infectious diseases, including malignant malaria that  
220 caused high transmission and mortality rates before the Southern Song Dynasty (1127–1279  
221 AD). This hostile environment imposed severe physiological challenges on the inhabitants in  
222 South China [7]. Native inhabitants like humans and pigs are believed to have evolved the  
223 adaptive mechanisms to address this harsh environment, likely via selection of immune-related  
224 genes during the long history of colonization of this area. It is thus conceivable that those genes,  
225 including *GOLMI-NAA35* within the introgression regions from SCN pigs, are enriched in  
226 immune-related signaling pathway genes. Interestingly, a recent genomic analysis unraveled a  
227 list of genes related to immune response under selection in southern Han Chinese, including  
228 *G6DP* associated with resistance to malaria [16].

229

230 **The introgressed *KATNAL1* haplotype from ECN pigs has been preferentially selected to**  
231 **increase the fertility of FLW boars**

232 In FLW pigs, a 200 kb region on chromosome 11 (6.68-6.88 Mb on Sscrofa10.2 and 6.92-7.12  
233 Mb on Sscrofa11.1) showed the strongest (the highest rIBD value) signal of admixture with  
234 ECN pigs, and it contained only one gene, *KATNAL1*. *KATNAL1* regulates microtubule  
235 dynamics in testicular support cells, affecting the separation and binding of microtubules.  
236 Promoting the rapid reorganization of testicular support cell microtubule arrays is an essential  
237 process for spermatogenesis and male fertility [17]. Thus, *KATNAL1* plays an important role  
238 in spermatogenesis. Given the top introgression signal at the *KATNAL1* locus and the role of  
239 *KATNAL1* in boar fertility, we conducted an in-depth analysis focusing on the *KATNAL1* region  
240 using the same method as used for the *GOLMI-NAA35* locus.

241 We found that the frequency of the shared IBD haplotype between FLW and ECN pigs in  
242 the *KATNAL1* region was particularly higher than that in the surrounding segments (**fig. 4a**).



243 There was a remarkable local increase of  $F_{ST}$  between FLW pigs and European wild boars and  
244 a significant decrease of  $F_{ST}$  between FLW pigs and ECN pigs in the *KATNAL1* region (**fig.**  
245 **4b**). FLW pigs had four main haplotypes in this region. Most individuals (30 out of 36) carried  
246 haplotypes highly similar to the ECN haplotypes, and the others were similar to European wild  
247 boars and European domestic pigs (**fig. 4c**). Additionally, 30 FLW pigs and ECN pigs were  
248 clustered into one large clade while only six FLW pigs were grouped with European pigs in an  
249 NJ tree that was constructed with 529 SNPs in the *KATNAL1* gene (**supplementary fig. S8**).  
250 Meanwhile, we constructed a haplotype network using these 529 SNPs (**fig. 4d**) and analyzed  
251 the nucleotide differences among different haplotypes (**supplementary fig. S9**). The most  
252 frequent haplotype (XXVII) appeared 57 times in the 266 tested individuals, including 35 FLW  
253 pigs, 18 ECN pigs, 2 ALW pigs and 2 SCN pigs. This haplotype and its closest ECN haplotype  
254 (XXV, at five different sites, **supplementary fig. S9**) were divergent from the European pig  
255 haplotype groups (**fig. 4d**). These results further demonstrated that the *KATNAL1* haplotypes  
256 were introgressed from ECN pigs into FLW pigs.

257 We performed LD bootstrap sampling and XP-EHH analysis to detect evidence of selection  
258 at the *KATNAL1* locus in FLW pigs. First, we compared the LD value ( $r^2$ ) of the *KATNAL1*  
259 region and those of 10,000 randomly selected genomic regions with the same size as the  
260 *KATNAL1* gene (43.4 kb). We found that the LD level in the *KATNAL1* region ( $r_{0.3}^2 = 437.5$  kb)  
261 was a significant ( $P = 0.02$ ) outlier, ranking in the top 2.5% of 10,000 bootstrap results  
262 (**supplementary fig. S10**). We also detected a significant selection signal at the *KATNAL1*  
263 locus in FLW pigs but not in other LW pigs using XP-EHH (**fig. 4e**). These results suggest that  
264 the introgressed *KATNAL1* haplotype from ECN pigs was preferentially selected for in FLW  
265 pigs.

266 Given the important role of *KATNAL1* in male fertility, the fecundity of ECN pigs and  
267 historical selection for fecundity in FLW pigs, we speculated that the introgressed *KATNAL1*

268 haplotype could contribute to the improvement of male reproductive performance and thus  
269 underwent selection in FLW pigs since introgression. To test this hypothesis, we analyzed the  
270 association between the *KATNAL1* haplotypes and FLW boar fertility that was represented by  
271 the average estimated breeding value (EBV) for TNB of mating sows. We detected a significant  
272 difference in boar fertility between 17 homozygous carriers of the introgressed haplotype (*QQ*)  
273 and 14 carriers of non-ECN pig haplotypes (*qq*) ( $P = 0.036$ ; **fig. 4f**). The EBV for TNB (EBV-  
274 TNB) of *QQ* individuals was 0.018, with a difference of 0.32 (which equates to an increase of  
275 0.32 piglets born per parity) compared with *qq* individuals. As TNB is a complex multi-locus  
276 trait, an increase of 0.32 piglets born is substantial for current pig breeding programs. This  
277 indicated that the introgressed *KATNAL1* haplotype has been favored and intensively selected  
278 by breeders, contributing to the formation of excellent reproductive traits in FLW pigs.

279

#### 280 ***AHR* haplotypes that associate with increased litter size were likely introgressed from** 281 **ECN pigs into LW pigs**

282 In 2014, Bosse *et al.* [11] found that Chinese haplotypes in a 6.8-Mb region on chromosome 9  
283 containing the *AHR* gene were introgressed into European pigs and were preferentially selected  
284 to increase fertility during the development of LW pigs. We also conducted a shared haplotype  
285 test (rIBD) between 121 Chinese pigs and 64 LW pigs in this 6.8-Mb region. We confirmed  
286 the presence of Chinese-derived haplotypes in European pigs including FLW pigs, with a  
287 strong introgression signal at the *AHR* locus (SSC9: 92.25–97.45 Mb in Sscrofa10.2 and 83.90–  
288 88.40 Mb in Sscrofa11.1) (**supplementary fig. S11**). To explore the geographic origin of the  
289 introgressed Chinese *AHR* haplotypes, we first constructed a phylogenetic tree of all sequenced  
290 individuals around the *AHR* region, and surprisingly found that most of domestic pigs were  
291 clustered together with small genetic distance but were divergent from European and Asian  
292 wild boars (**supplementary fig. S12a**). We further reconstructed and visualized haplotypes

293 around the *AHR* gene (86.5–86.6 Mb on Sscrofa11.1 and 95.4–95.56 Mb on Sscrofa10.2) and  
294 found that most haplotypes of LW pigs were highly similar to those of Chinese EHL pigs and  
295 Tibetan pigs (**fig. 5a**). In an NJ-tree of this region, 15 FLW pigs gathered with EHL pigs and  
296 Tibetan pigs, defining a branch distinct from other Chinese breeds (**supplementary fig. S12b**).  
297 Moreover, the most frequent haplotype (XVIII) appeared 99 times in all 266 sequenced  
298 individuals, including 30 FLW pigs, 24 other LW pigs, 17 EHL pigs, 26 Tibetan pigs and 2  
299 Asian wild boars (**fig. 5b**). The nucleotide difference between this haplotype (XVIII) and  
300 Chinese haplotype XVII was only 6, in contrast to 70 between this haplotype and EWB  
301 haplotype XLII (**supplementary fig. S13**). In addition, FLW pigs and EHL pigs had the  
302 smallest  $F_{ST}$  values with the exception of Tibetan pigs and other LW pigs (**supplementary fig.**  
303 **S12c**). Given the geographic distance between Tibet and Europe and the lack of any historical  
304 records describing the importation of Tibetan pigs into Europe, we argue that Chinese derived  
305 *AHR* haplotypes in FLW pigs were most likely introgressed from ECN pigs such as EHL pigs  
306 through human-mediated transportation about 200–300 years ago.

307 We noted that the introgressed haplotype XVIII was desirable for increasing the EBV-TNB  
308 of both FLW pigs (**fig. 5c**) and EHL pigs (**fig. 5d**). By genotyping the haplotype tag SNPs and  
309 one-way analysis of variance (see Methods), we found that homozygous carriers of the  
310 introgressed *AHR* haplotype (XVIII) had 0.24 higher EBV-TNB than heterozygous carriers ( $P$   
311 = 0.001, **supplementary table S6**) in EHL pigs. Moreover, the introgressed *AHR* haplotype  
312 was significantly associated with increased EBV-TNB in FLW sows, with an additive effect  
313 value of 0.25 ( $P = 2.39 \times 10^{-5}$ ; **fig. 5c, supplementary table S7**), which was in agreement with  
314 the report of Bosse *et al.*[11]. Similar to the *KATNAL1* and *GOLM1-NAA35* regions, the LD  
315 value of FLW pigs at the *AHR* gene region ranked in the top 7% (significant outlier) of all  
316 10,000 bootstrap values ( $P = 0.03$ , **supplementary fig. S14**). We also detected a significant  
317 iHS selection signal within the FLW pig population (**supplementary fig. S15**). These findings

318 enabled us to conclude that the introgressed *AHR* haplotype had been under a preferential  
319 selection to improve the fertility of FLW pigs.

320

## 321 **Discussion**

### 322 **Introgression of both SCN and ECN pig DNA contributed to the genetic improvement of** 323 **European modern pig breeds**

324 European and Asian domestic pigs were independently domesticated from European and Asian  
325 wild boars, respectively, nearly 10,000 years ago [3, 5, 6]. In this study, population genetics  
326 analyses confirmed striking genetic differences between Chinese and European domestic pigs  
327 and uncovered obvious genetic differentiation between SCN and ECN pigs, which represent  
328 two ancestral lineages of Chinese pigs. Of note, we identified Chinese haplotypes in FLW pigs,  
329 which were introgressed from both SCN and ECN pigs. We inferred that the introgression  
330 events occurred 220–310 years ago, which was in accordance with historical records that SCN  
331 pigs were transported to England through the Guangzhou port during the first Industrial  
332 Revolution [7]. Our results also supported the speculation that ECN pigs were introduced into  
333 Europe, likely through the Shanghai and Ningbo ports, in the decades before the Qing Dynasty  
334 imposed a ban on the sea in 1757. Thus, we believe that both SCN and ECN pigs were  
335 introduced to Europe to improve the production performance of local breeds, contributing to  
336 the development of modern European commercial pig breeds. Taking the *GOLMI-NAA35* and  
337 *KATNAL1* loci as examples, the introgressed *GOLMI-NAA35* haplotype from SCN pigs was  
338 beneficial for improving disease resistance in FLW pigs, and the introgressed *KATNAL1*  
339 haplotype from ECN pigs was favorable for boar fertility and provided genetic variations for  
340 the development of high-fecundity FLW pigs. In addition, we show that the *AHR* haplotype  
341 associated with increased sow litter size was introduced from ECN pigs into European pigs,  
342 such as the Large White breed, through human-mediated transportation and hybridization some

343 200–300 years ago. It has further experienced preferential selection, presumably during the  
344 past decades, and is present at high frequency in FLW pigs, contributing to the improvement  
345 of the reproductive performance of this breed. It shows that human-driven crossbreeding play  
346 important roles in the development of global pig breeds, illustrating a complex breeding history  
347 of domestic pigs. These findings not only advance our understanding of the breeding history  
348 of modern European commercial pig breeds but also provides insights into the genetic  
349 mechanisms underlying economically important traits in pigs.

350

## 351 **Materials and Methods**

### 352 **Samples**

353 All procedures used for this study and involving animals were in compliance with guidelines  
354 for the care and utility of experimental animals established by the Ministry of Agriculture of  
355 China. The ethics committee of Jiangxi Agricultural University approved this study. This study  
356 utilized genome-wide re-sequencing data from 266 animals (**supplementary table S1**), of  
357 which 153 pigs were re-sequenced for this study and 113 genome sequence datasets were  
358 downloaded from public databases (Registration Nos. [PRJEB1683](#) [18], [PRJEB9922](#) [19],  
359 [PRJNA260763](#) [20], [PRJNA398176](#) [21], [PRJNA213179](#) [22] and [PRJNA488327](#) [23]).  
360 Among the 153 pigs, 36 were FLW sows and were collected from the Guangdong WENS Food  
361 Company (24 individuals) and Jiangxi Lvhuan Animal Husbandry Company (12 individuals).  
362 The 36 FLW sows were selected according to the following criteria. First, we calculated the  
363 relationship coefficients of all individuals in the nucleus populations of the two companies  
364 using DMU software [24] and pedigree records. Then we selected sows with a small  
365 relationship coefficient and excellent litter sizes (TNB more than 16). Finally, we chose 36  
366 prolific individuals with distant kinship according to a phylogenetic relationship network  
367 constructed by Cytoscape v3.2.1 (Cytoscape, RRID:SCR\_003032) [25] (**supplementary fig.**

368 **S1**). In total, there were 27 wild boars from China and Europe, 7 outgroup individuals, 121  
369 pigs from Chinese indigenous breeds, and 111 pigs from European commercial breeds.  
370 According to the geographic distribution, Chinese domestic pigs were divided into ECN (37)  
371 pigs, SCN (20) pigs, SWCN (36) pigs, and NCN (28) pigs (see **supplementary table S1** for  
372 details). In addition, whole-genome sequence data of 28 LW pigs was downloaded from public  
373 databases, with 14 individuals submitted by Seoul National University [20] and another 14  
374 individuals submitted by Wageningen University [18]. To identify the source of these 28 LW  
375 pigs, we downloaded the Illumina 60K chip SNP data set of 76 LW pigs [26], including 20  
376 Dutch Large White pigs (NLW), 16 Danish Large White pigs (DLW), 20 Chinese Large White  
377 pigs (CLW), and 20 American Large White pigs (ALW). Next, we retrieved the same 60K chip  
378 SNPs from the whole-genome sequence data sets of the 28 LW pigs. We filtered out SNPs with  
379 an MAF less than 0.05, a call rate less than 90%, and an LD ( $r^2$ ) value more than 0.3 using  
380 PLINK v1.9 (PLINK, RRID:SCR\_001757) [27], and we performed PCA and NJ-tree analyses  
381 using the remaining SNPs to identify the origin of the 28 LW pigs (**supplementary fig. S2**).

382

### 383 **Whole-genome sequencing and SNP calling**

384 We extracted genomic DNA from the ear tissues of 153 pigs using a routine phenol/chloroform  
385 protocol, and eligible samples were delivered to the Novogene company (Beijing, China).  
386 Sequencing was performed on Hiseq 2000 or 2500 instruments (Illumina, La Jolla, CA USA;  
387 Illumina HiSeq 2500 System, RRID:SCR\_016383). The sequencing libraries were constructed  
388 with 125 bp paired ends (PE125), a 500 bp average insert fragment size, and a fragment size  
389 less than 800 bp. The genome sequencing coverage of each individual was at least 20×, with a  
390 minimum data of 60 G.

391 **Quality control:** We obtained the raw sequencing data from Hiseq sequencing platform  
392 using raw image data. We obtained clean data for performing downstream analysis after

393 performing the following steps: (1) removal of the linker sequence, (2) retention of reads with  
394 Q20 of more than 90% (the probability of base recognition correct rate higher than 99%) and  
395 Q30 of more than 85% (the probability of base recognition correct rate higher than 99.9%)[28],  
396 (3) culling of short repeat DNA segments, and (4) filtering reads with three consecutive "N".

397 **Mutation detection:** We established a reference genome index of *Sscrofa* 10.2 [6] using the  
398 index function in BWA v0.7.12 (BWA, RRID:SCR\_010910) [29]. We blasted paired-end reads  
399 against the index using an algorithm from BWA and obtained binary bam files from sam files  
400 by SAMtools v1.4 (SAMTOOLS, RRID:SCR\_002105) [30]. We used samblaster v0.1.22  
401 (SAMBLASTER, RRID:SCR\_000468) [31] to reject redundancy information and calculated  
402 the alignment rate between re-sequencing data and the reference genome, as well as coverage  
403 and sequencing depth. We sorted binary bam files via GATK v3.7 (GATK,  
404 RRID:SCR\_001876) [32]. We used the HaplotypeCaller function for mutation detection across  
405 each chromosome of each individual and obtained a SNP data set of the 266 individuals by  
406 deleting InDel information. We filtered out SNPs with an MAF less than 0.01 and a call rate  
407 less than 90% using PLINK v1.9 [27]. We used the remaining 32.7 million SNPs in the data  
408 set for subsequent statistical analysis.

409

#### 410 **Population genetic analysis**

411 First, we generated a SNP data set with an MAF more than 0.05 and a call rate more than 90%  
412 from autosomal SNPs from 259 pigs (*Sus scrofa*) excluding seven OUT individuals. Second,  
413 we pruned SNPs with an LD ( $r^2$ ) decay of more than 0.3 in each window with 50 SNPs using  
414 the command indep-pairwise (50 10 0.3) in PLINK v1.9 [27]. Then four principal components  
415 of each individuals were estimated using --pca command in GCTA software [33]. The average  
416 shared allele (1-Dst) distance matrix between individuals was constructed using the command  
417 --distance-matrix in PLINK v1.9. A rootless NJ tree was constructed via phylip v3.69 (PHYLIP,

418 RRID:SCR\_006244) [34] and was visualized with FigTree v1.42 (FigTree,  
419 RRID:SCR\_008515). We also explored the unbiased estimation method proposed by Weir and  
420 Cockerham to calculate the genetic differentiation ( $F_{ST}$ [35]) matrix between 14 Chinese pig  
421 breeds and 6 European pig breeds using the --fst command in PLINK v1.9 ([27]). Then, we  
422 constructed an interbreed NJ tree using phylip v3.69 [34]. ADMIXTURE (ADMIXTURE,  
423 RRID:SCR\_001263) [36] was used to estimate the ancestral lineage composition under default  
424 parameters. First, we removed the OUT group and populations with fewer than five individuals.  
425 Then we randomly selected six individuals from the remaining 21 populations and filtered out  
426 SNPs with an MAF of less than 0.05, an LD ( $r^2$ ) of more than 0.3, and call rates less than 90%.  
427 Finally, we used a data set with 125 individuals and 658,601 SNPs to analyze the ancestral  
428 lineage composition patterns. In addition, we utilized TreeMix v1.12 [37] to infer the genetic  
429 differentiation among populations. We set OUT as the outgroup population, excluding  
430 populations with fewer than six samples and SNPs with an MAF less than 0.05 and a call rate  
431 less than 90%. We used the data set with 19,282,590 SNPs to estimate genetic differentiation  
432 among 21 populations under no migration events via TreeMix v1.12 [37].

433

#### 434 **Introgression analysis**

435 We detected the introgression signals between Chinese pigs (ECN and SCN pigs) and FLW  
436 pigs using an IBD sharing approach [11]. First, we used a data set with 266 individuals and  
437 approximately 20 million SNPs to phase haplotypes using the fastPhase function [38] in Beagle  
438 v4.0 and to detect IBD fragments in each individual using the fastIBD function [39]. Then we  
439 divided the whole genome into numbers of 50 kb windows (25 kb sliding) and calculated the  
440 shared IBD haplotype numbers between two populations (FLW vs. European wild boars  
441 (EWB), FLW vs. ECN, and FLW vs. SCN) in each window. We phased the haplotypes and  
442 detected the IBD regions independently 10 times and then normalized the IBD values (nIBD).



443 The nIBD values ranged from 0 (no shared IBD detected) to 1 (all individuals shared the IBD  
444 haplotype). Finally, we used the rIBD (relative frequency of IBD) statistic to measure the  
445 shared IBD between FLW pigs and SCN or ECN pigs, respectively ( $rIBD_{FLW-SCN} = nIBD_{FLW-SCN} - nIBD_{FLW-EWB}$ ,  $rIBD_{FLW-ECN} = nIBD_{FLW-ECN} - nIBD_{FLW-EWB}$ ), where a positive rIBD  
446 indicated potential introgression and 5% empirical distribution in the far right tail were set as  
447 the significance threshold. For genomic regions showing strong rIBD introgression signals in  
448 FLW pigs, we further estimated  $F_{ST}$  between FLW pigs and European wild boars, as well FLW  
449 pigs and Chinese pigs (SCN pigs or ECN pigs), respectively. We also constructed haplotype  
450 networks using SNPs with a MAF of greater than 0.05 and call rates of greater than 90% at the  
451 *GOLMI-NAA3* (298 SNPs) and *KATNAL1* (529 SNPs) loci, and using all SNPs (217 SNPs)  
452 that were observed at least twice in the 266 re-sequenced individuals at the *AHR* locus. We  
453 explored the fastPhase function with 1000 iterations in Beagle v4.0 (BEAGLE,  
454 RRID:SCR\_001789) [39] to phase haplotypes and used the “haploNet” command in the R  
455 package “pegas” [40] to calculate the pairwise differences between haplotypes. We selected  
456 SNPs with an MAF of greater than 0.05, a call rate of greater than 90% and an LD ( $r^2$ ) < 0.3  
457 using PLINK v1.9 [27], and then explored the selected SNPs to estimate the admixture time  
458 between populations via ALDER v1.0.3 under default parameters [13]. In short, we used the  
459 “convert” function in EIGENSTRAT [41] to convert the data format. We set FLW as a mixed  
460 population, EWB and SCN as one reference population, EWB and ECN as another reference  
461 population, and five years as one generation.

463

#### 464 **Signature of selection**

465 We used the data set that excluded SNPs with an MAF of less than 0.05 and a call rate less  
466 than 90% in the whole-genome SNPs data set of 36 FLW pigs to calculate the correlation  
467 coefficient ( $r^2$ ) of each SNP pair in a target region using the commands `--r2 inter-chr --ld-`

468 window-r2 0 in PLINK v1.9 [40], and we used the average  $r^2$  as the LD value in the region.  
469 Meanwhile, we randomly selected 10,000 regions with the same size as the target region across  
470 the genome, and we calculated the average  $r^2$  of each region in the 36 FLW pigs. Finally, we  
471 visualized the density curve of the 10,000 bootstrap values using R. Furthermore, we used  
472 commands --ihs [42] and --xpehh [43] under default parameters in selscan [44] software to  
473 detect the signatures of selection in 50 kb windows with a step size of 25 kb in FLW pigs.

474

### 475 **Haplotype association analysis**

476 **The *GOLMI-NAA35* locus:** We detected the serum IL-6 levels in 54 mature FLW sows at an  
477 age of 2–2.5 years from the same farm using the Porcine IL-6 ELISA Kit (Shanghai Keshun  
478 Biological Technology, China). The concentration of each individual was determined from the  
479 averaged repeat of three trials per individual. Meanwhile, we selected two tag SNPs to  
480 distinguish the introgressed haplotypes (VII and VIII) from the other haplotype in the *GOLMI-*  
481 *NAA35* region in FLW pigs (**fig. 3e**). The tag SNPs were genotyped by Sanger sequencing PCR  
482 products amplified with specific primers (**supplementary table S5**). A Student's *t*-test was  
483 used to detect the association between haplotypes and the serum IL-6 concentrations (log<sub>2</sub> (IL-  
484 6 values)).

485 **The *KATNAL1* locus:** We collected 765 FLW sows and 31 FLW boars from the Jiangxi  
486 Lvhuan Farming Group. First, we filtered parities with litter size less than five piglets. Then  
487 we set estrus, year, season, parity and pregnancy duration as fixed effects, and mating boars  
488 and random sow effects as random effects. We then estimated the EBV for TNB of 765 FLW  
489 pigs via DMU software [24] and pedigree information. Next, we genotyped eight tagged SNPs  
490 to distinguish each *KATNAL1* haplotype in the 31 FLW boars by PCR amplification and Sanger  
491 sequencing with primers listed in **supplementary table S8**. We denoted the introgressed  
492 XXVII haplotype from ECN pigs as Q (**fig. 4e**) and the other haplotypes as q (**supplementary**

493 **table S9**). Finally, we used Student's *t*-test to test the association between *KATNAL1*  
494 haplotypes and the average EBV-TNB of mating sows of the 31 FLW boars.

495 **The *AHR* locus:** We genotyped two tagged SNPs representing the *AHR* haplotypes for  
496 344 FLW sows by PCR amplification and Sanger sequencing with primers listed in  
497 **supplementary table S6**. We identified 230 *QQ* sows homozygous for the introgressed  
498 haplotype, 36 *Qq* sows and 78 *qq* sows who were missing the introgressed haplotypes  
499 (**supplementary table S6**). Then we tested the association between the *AHR* haplotypes and  
500 the EBV-TNB of the 344 sows using single-factor analysis of variance. Furthermore, we  
501 collected 221 Erhualian sows with multiparity records from Jiangsu Province and calculated  
502 the EBV-TNB of these sows using DMU software and pedigree information as mentioned  
503 above. We genotyped a tag SNP in the *AHR* region by Sanger sequencing PCR products with  
504 specific primers (**supplementary table S7**). We detected 176 *QQ* sows homozygous for the  
505 introgressed haplotype and 45 heterozygous (*Qq*) sows. We used a Student's *t*-test to examine  
506 the association between *AHR* haplotypes and EBV-TNB in Erhualian sows.

507

## 508 **Funding**

509 This study is supported by the Natural Science Foundation of China (31525023) and the  
510 National Key Research Project of China (2016ZX08006-5).

511

## 512 **Abbreviations**

513 ALW: American Large White; NLW: Dutch Large White; DLW: Danish Large White; EBV:  
514 estimated breeding value ECN: Eastern Chinese; EHL: Erhualian ; ELISA: enzyme-linked  
515 immunoassay; FLW: French Large White; GO: Gene Ontology; JH: Jinhua; KEGG: Kyoto  
516 Encyclopedia of Genes and Genomes; LD: linkage disequilibrium; LUC: Luchuan; LW:

517 Large White; OUT: outgroup; PCA: principal component analysis; rIBD: relative identity-by-  
518 descent; SCN: Southern Chinese; SNPs: single nucleotide polymorphisms.

### 519 **Author Contributions**

520 J.R. and L.H. designed the study and analyzed the data. J.R., H.C. and L.H. wrote the paper.  
521 H.C., M.H., and B.Y. performed the bioinformatic analyses. H.C., M.H., Z.D. Z.W. and Y.H.  
522 collected data and performed sequencing and genotyping experiments.

523

### 524 **Acknowledgements**

525 We thank LetPub ([www.letpub.com](http://www.letpub.com)) for its linguistic assistance during the preparation of this  
526 manuscript.

527

### 528 **Availability of supporting data and materials**

529 On top of the public datasets used, previously unpublished raw sequencing is available via  
530 NCBI Bioproject PRJNA550237. All other supporting data and materials are available in the  
531 *GigaScience* GigaDB database [45].

532

### 533 **Competing financial interests**

534 The authors declare no competing financial interests

535

### 536 **References**

- 537 1. Giuffra E, Kijas JM, Amarger V, Carlborg O, Jeon JT and Andersson L. The origin of  
538 the domestic pig: independent domestication and subsequent introgression. *Genetics*.  
539 2000;154 4:1785-91.
- 540 2. Kijas JM and Andersson L. A phylogenetic study of the origin of the domestic pig  
541 estimated from the near-complete mtDNA genome. *Journal of Molecular Evolution*.  
542 2001;52 3:302-8.

- 543 3. Larson G, Dobney K, Albarella U, Fang M, Matissoosmith E, Robins J, et al.  
544 Worldwide phylogeography of wild boar reveals multiple centers of pig  
545 domestication. *Science*. 2005;307 5715:1618-21.
- 546 4. Frantz LA, Schraiber JG, Madsen O, Megens HJ, Bosse M, Paudel Y, et al. Genome  
547 sequencing reveals fine scale diversification and reticulation history during speciation  
548 in *Sus*. *Genome Biol*. 2013;14 9:R107. doi:10.1186/gb-2013-14-9-r107.
- 549 5. Frantz L, Meijaard E, Gongora J, Haile J, Groenen MAM and Larson G. The  
550 evolution of Suidae. *Annual Review of Animal Biosciences*. 2016;4 1:61.
- 551 6. Groenen MA, Archibald AL, Uenishi H, Tuggle CK, Takeuchi Y, Rothschild MF, et  
552 al. Analyses of pig genomes provide insight into porcine demography and evolution.  
553 *Nature*. 2012;491 7424:393.
- 554 7. Wang L, Chan YF, Russell P, Mauceli E, Johnson J, Swofford R, et al. *Animal  
555 Genetic Resources in China: pigs* (ed. China National Commission of Animal Genetic  
556 Resources). China Agriculture Press; 2011.
- 557 8. Rischkowsky B and Pilling D. *The State of the World's Animal Genetic Resources  
558 for Food and Agriculture* (Food and Agriculture Organization (FAO)). 2007.
- 559 9. Briggs HM and Briggs DM. *Modern Breeds of Livestock*. 4th ed. Macmillan  
560 Publishing Co., Inc.; 1980.
- 561 10. Zhang W. Introduction to Large White pigs. *SWINE PRODUCTION*. 2011; 1:61-4.
- 562 11. Bosse M, Megens HJ, Frantz LA, Madsen O, Larson G, Paudel Y, et al. Genomic  
563 analysis reveals selection for Asian genes in European pigs following human-  
564 mediated introgression. *Nat Commun*. 2014;5:4392. doi:10.1038/ncomms5392.
- 565 12. Ramos AM, Crooijmans RP, Affara NA, Amaral AJ, Archibald AL, Beaver JE, et al.  
566 Design of a high density SNP genotyping assay in the pig using SNPs identified and  
567 characterized by next generation sequencing technology. *PLoS One*. 2009;4 8:e6524.  
568 doi:10.1371/journal.pone.0006524.
- 569 13. Loh PR, Lipson M, Patterson N, Moorjani P, Pickrell JK, Reich D, et al. Inferring  
570 admixture histories of human populations using linkage disequilibrium. *Genetics*.  
571 2013;193 4:1233.
- 572 14. Kladney RD, Bulla GA, Guo L, Mason AL, Tollefson AE, Simon DJ, et al. GP73, a  
573 novel Golgi-localized protein upregulated by viral infection. *Gene*. 2000;249 1-2:53-  
574 65.
- 575 15. Li Y, Oosting M, Deelen P, Ricañoponce I, Smeekens S, Jaeger M, et al. Inter-  
576 individual variability and genetic influences on cytokine responses to bacteria and  
577 fungi. *Nature Medicine*. 2016;22 10:1192.
- 578 16. Liu S, Huang S, Chen F, Zhao L, Yuan Y, Francis SS, et al. Genomic Analyses from  
579 Non-invasive Prenatal Testing Reveal Genetic Associations, Patterns of Viral  
580 Infections, and Chinese Population History. *Cell*. 2018;175 2:347-59 e14.  
581 doi:10.1016/j.cell.2018.08.016.
- 582 17. Smith LB, Milne L, Nelson N, Eddie S, Brown P, Atanassova N, et al. *KATNAL1  
583 Regulation of Sertoli Cell Microtubule Dynamics Is Essential for Spermiogenesis and  
584 Male Fertility*. *Plos Genetics*. 2012;8 5:e1002697.
- 585 18. Rubin CJ, Megens HJ, Martinez Barrio A, Maqbool K, Sayyab S, Schwochow D, et  
586 al. Strong signatures of selection in the domestic pig genome. *Proc Natl Acad Sci U S  
587 A*. 2012;109 48:19529-36. doi:10.1073/pnas.1217149109.
- 588 19. Frantz LA, Schraiber JG, Madsen O, Megens HJ, Cagan A, Bosse M, et al. Evidence  
589 of long-term gene flow and selection during domestication from analyses of Eurasian  
590 wild and domestic pig genomes. *Nature Genetics*. 2015;47 10:1141.

- 591 20. Sunjin M, Tae-Hun K, Kyung-Tai L, Woori K, Taeheon L, Si-Woo L, et al. A  
592 genome-wide scan for signatures of directional selection in domesticated pigs. *BMC*  
593 *Genomics*,16,1(2015-02-25). 2015;16 1:1-12.
- 594 21. Zhu Y, Li W, Yang B, Zhang Z, Ai H, Ren J, et al. Signatures of Selection and  
595 Interspecies Introgression in the Genome of Chinese Domestic Pigs. *Genome Biol*  
596 *Evol.* 2017;9 10:2592-603. doi:10.1093/gbe/evx186.
- 597 22. Ai H, Fang X, Yang B, Huang Z, Chen H, Mao L, et al. Adaptation and possible  
598 ancient interspecies introgression in pigs identified by whole-genome sequencing. *Nat*  
599 *Genet.* 2015;47 3:217-25. doi:10.1038/ng.3199.
- 600 23. Yan G, Guo T, Xiao S, Zhang F, Xin W, Huang T, et al. Imputation-Based Whole-  
601 Genome Sequence Association Study Reveals Constant and Novel Loci for  
602 Hematological Traits in a Large-Scale Swine F2 Resource Population. *Front Genet.*  
603 2018;9:401. doi:10.3389/fgene.2018.00401.
- 604 24. Madsen P, Sørensen P, Su G, Damgaard LH, Thomsen H and Labouriau R. DMU - a  
605 package for analyzing multivariate mixed models. In: *Proceedings of the 8th World*  
606 *Congress on Genetics Applied to Livestock Production, Belo Horizonte, Minas*  
607 *Geraiis, Brazil, 13-18 August, 2006* 2014, pp.27-11.
- 608 25. Shannon P, Markiel A, Ozier O, Baliga NS, Wang JT, Ramage D, et al. Cytoscape: A  
609 Software Environment for Integrated Models of Biomolecular Interaction Networks.  
610 Routledge; 2003.
- 611 26. Yang B, Cui L, Perez-Enciso M, Traspov A, Crooijmans R, Zinovieva N, et al.  
612 Genome-wide SNP data unveils the globalization of domesticated pigs. *Genet Sel*  
613 *Evol.* 2017;49 1:71. doi:10.1186/s12711-017-0345-y.
- 614 27. Chang CC, Chow CC, Tellier LC, Vattikuti S, Purcell SM and Lee JJ. Second-  
615 generation PLINK: rising to the challenge of larger and richer datasets. *Gigascience.*  
616 2015;4:7. doi:10.1186/s13742-015-0047-8.
- 617 28. Ewing B and Green P. Base-calling of automated sequencer traces using phred. II.  
618 Error probabilities. *Genome Res.* 1998;8 3:186-94.
- 619 29. Li H and Durbin R. Fast and accurate short read alignment with Burrows-Wheeler  
620 transform. *Bioinformatics.* 2009;25 14:1754-60. doi:10.1093/bioinformatics/btp324.
- 621 30. Li H. A statistical framework for SNP calling, mutation discovery, association  
622 mapping and population genetical parameter estimation from sequencing data.  
623 *Bioinformatics.* 2011;27 21:2987-93. doi:10.1093/bioinformatics/btr509.
- 624 31. Faust GG and Hall IM. SAMBLASTER: fast duplicate marking and structural variant  
625 read extraction. *Bioinformatics.* 2014;30 17:2503-5.  
626 doi:10.1093/bioinformatics/btu314.
- 627 32. McKenna A, Hanna M, Banks E, Sivachenko A, Cibulskis K, Kernytzky A, et al. The  
628 Genome Analysis Toolkit: a MapReduce framework for analyzing next-generation  
629 DNA sequencing data. *Genome Res.* 2010;20 9:1297-303.  
630 doi:10.1101/gr.107524.110.
- 631 33. Yang J, Lee SH, Goddard ME and Visscher PM. GCTA: a tool for genome-wide  
632 complex trait analysis. *Am J Hum Genet.* 2011;88 1:76-82.  
633 doi:10.1016/j.ajhg.2010.11.011.
- 634 34. Cummings MP. PHYLIP (phylogeny inference package). *Dictionary of*  
635 *Bioinformatics and Computational Biology.* 2004.
- 636 35. Weir BS and Cockerham CC. Estimating F-Statistics for the Analysis of Population  
637 Structure. *Evolution.* 1984;38 6:1358-70. doi:10.1111/j.1558-5646.1984.tb05657.x.
- 638 36. Alexander DH, Novembre J and Lange K. Fast model-based estimation of ancestry in  
639 unrelated individuals. *Genome Res.* 2009;19 9:1655-64. doi:10.1101/gr.094052.109.

- 640 37. Pickrell JK and Pritchard JK. Inference of population splits and mixtures from  
641 genome-wide allele frequency data. *PLoS Genet.* 2012;8 11:e1002967.  
642 doi:10.1371/journal.pgen.1002967.
- 643 38. Browning SR and Browning BL. Rapid and accurate haplotype phasing and missing-  
644 data inference for whole-genome association studies by use of localized haplotype  
645 clustering. *Am J Hum Genet.* 2007;81 5:1084-97. doi:10.1086/521987.
- 646 39. Browning BL and Browning SR. A fast, powerful method for detecting identity by  
647 descent. *Am J Hum Genet.* 2011;88 2:173-82. doi:10.1016/j.ajhg.2011.01.010.
- 648 40. Paradis E. pegas: an R package for population genetics with an integrated-modular  
649 approach. *Bioinformatics.* 2010;26 3:419-20. doi:10.1093/bioinformatics/btp696.
- 650 41. Price AL, Patterson NJ, Plenge RM, Weinblatt ME, Shadick NA and Reich D.  
651 Principal components analysis corrects for stratification in genome-wide association  
652 studies. *Nat Genet.* 2006;38 8:904-9. doi:10.1038/ng1847.
- 653 42. Voight BF, Kudravalli S, Wen X and Pritchard JK. A map of recent positive  
654 selection in the human genome. *PLoS Biol.* 2006;4 3:e72.  
655 doi:10.1371/journal.pbio.0040072.
- 656 43. Sabeti PC, Varilly P, Fry B, Lohmueller J, Hostetter E, Cotsapas C, et al. Genome-  
657 wide detection and characterization of positive selection in human populations.  
658 *Nature.* 2007;449 7164:913-8. doi:10.1038/nature06250.
- 659 44. Szpiech ZA and Hernandez RD. selscan: An Efficient Multithreaded Program to  
660 Perform EHH-Based Scans for Positive Selection. *Molecular Biology & Evolution.*  
661 2014;31 10:2824-7.
- 662 45. Chen H; Huang M; Yang B; Wu Z; Deng Z; Hou Y; Ren J; Huang L (2020): Supporting  
663 data for "Introgression of Eastern Chinese and Southern Chinese haplotypes contributes  
664 to the improvement of fertility and immunity in European modern pigs" *GigaScience*  
665 Database. <http://dx.doi.org/10.5524/100688>

666 **Figure Legends**

667 **Fig. 1. Population relationship and structure.** (a) Principal component analysis of Chinese  
668 and European pigs. ECN, East Chinese pigs; NCN, North Chinese pigs; SCN, South Chinese  
669 pigs; SWCN, Southwest Chinese pigs; EUD, European domestic pigs. (b) Neighbor-joining  
670 (NJ) tree based on an identity-by-state matrix among individuals. (c) NJ tree based on an Fst  
671 matrix between populations. (d) Population structure of Chinese and European pigs revealed  
672 by ADMIXTURE analysis. MIN, Min pigs; HT, Hetao pigs; LWH, Laiwu pigs; EHL,  
673 Erhualian pigs; MS, Meishan pigs; JH, Jinhua pigs; GST, Tibetan pigs (gansu); SCT, Tibetan  
674 pigs (Sichuan); YNT, Tibetan pigs (Yunnan); TT, Tibetan pigs (Tibet); WZS, Wuzhishan pigs;  
675 LUC, Luchuan pigs; BMX, Bamaxiang pigs; XIANG, Xiang pigs; AWB, Asian wild boars;  
676 OUT, outgroup; EWB, European wild boars; HMP, Hampshire; DU, Duroc; LR, Landrace; PI,  
677 Pietrain; WDU, White Duroc; WLW, Dutch Large White pigs; KLW, Korea Large White pigs;  
678 FLW, French Large White pigs.

679

680 **Fig. 2. Introgressed Chinese haplotypes in French Large White pigs.** (a) Manhattan plot of  
681 rIBD values between French Large White (FLW) and South Chinese (SCN) pigs (positive  
682 value) or European wild boars (EWB) (negative value). The red dashed line indicates the top  
683 5% significance threshold. (b) Manhattan plot of rIBD values between FLW and East Chinese  
684 (ECN) pigs (positive value) or EWB (negative value). (c) Venn diagram of introgressed DNA  
685 (50 Kb windows) from SCN and ECN pigs in FLW pigs. (d) Venn diagram of genes in the  
686 introgressed regions from SCN and ECN pigs in FLW pigs. (e) Significantly enriched GO  
687 processes and KEGG pathways of introgressed genes in the introgressed regions from SCN  
688 and ECN pigs under selection in FLW pigs.

689



690 **Fig. 3. Introgression at the *GOLMI-NAA35* locus.** (a) rIBD values in a 2 Mb region  
691 harboring the *GOLMI-NAA35* gene. The brown dashed line indicates the 5% threshold line,  
692 and the *GOLMI-NAA35* region is indicated by grey dashed lines. (b) Genetic differentiation  
693 index ( $F_{ST}$ ) between French Large White (FLW) and European wild boar (EWB) or South  
694 Chinese (SCN) pigs. (c) Haplotype heatmap in the *GOLMI-NAA35* region. Major and minor  
695 alleles in FLW pigs are indicated by beige and light blue, respectively. (d) Haplotype network  
696 in the *GOLMI-NAA35* region. Each circle represents a haplotype, and the size of the circle is  
697 proportional to the haplotype frequency. The line width and length represent the difference  
698 between haplotypes. Different colors represent pigs from different geographical regions.  
699 SWCN, Southwest Chinese pigs; NCN, North Chinese pigs; AWB, Asian (Chinese) wild boars;  
700 ECN, East Chinese pigs; EUD, European domestic pigs. (e) Selection signals in the *GOLMI-*  
701 *NAA35* region by XP-EHH analysis between FLW and other Large White pigs. The brown  
702 dashed line indicates the 5% threshold line. (f) Serum interleukin 6 (IL-6) contents of FLW  
703 pigs homozygous (QQ) or heterozygous (Qq) for the introgressed *GOLMI-NAA35* haplotypes.  
704 Student's *t*-test was employed to compute the *P*-value ( $P = 0.015$ ).

705

706 **Fig. 4. Introgression at the *KATNAL1* locus.** (a) rIBD values in a 2 Mb region encompassing  
707 the *KATNAL1* gene. The brown dashed line indicates the 5% threshold line, and the *KATNAL1*  
708 region is indicated by grey dashed lines. (b) Genetic differentiation index ( $F_{ST}$ ) between French  
709 Large White (FLW) and European wild boar (EWB) or East Chinese (ECN) pigs. (c) Haplotype  
710 heatmap of the *KATNAL1* region. Major and minor alleles in FLW pigs are indicated by beige  
711 and light blue, respectively. (d) Haplotype network in the *KATNAL1* region. The legend is the  
712 same as in Figure 3. (e) Selection signals by XP-EHH analysis between FLW and other Large  
713 White pigs. The brown dashed line indicates the 5% threshold line. (f) Estimated breeding  
714 values for total number of piglets born (TNB EBV) of FLW sows that mated with FLW boars

715 homozygous (QQ) or heterozygous (Qq) for the introgressed haplotypes. Student's *t*-test was  
716 employed to compute the *P*-value ( $P = 0.036$ ).

717

718 **Fig. 5. Human-mediated introgression at the *AHR* locus.** (a) Haplotype heatmap of a 100  
719 kb region encompassing the *AHR* gene on chromosome 9 (86.5-86.6 Mb on Sscrofa11.1 and  
720 95.4-95.56 Mb on Sscrofa10.2). Major and minor alleles in FLW pigs are indicated by beige  
721 and light blue, respectively. (b) *AHR* haplotype network. Each pie chart represents one unique  
722 haplotype, and the radius of the pie chart is proportional to the two times of  $\log_2$  (number of  
723 chromosomes with that haplotype). The width and length of the edges are proportional to the  
724  $\log_2$  (number of pairwise differences between the joined haplotypes) plus one, and the thinnest  
725 edge represents a difference of one mutation. The full names of pig codes are given in the  
726 legend of Figure 3. (c) French Large White sows carrying the homozygous archaic *AHR*  
727 haplotype show significantly ( $P = 2.39 \times 10^{-5}$ ) lower estimated breeding values for total number  
728 born EBV (TNB\_EBV), compared with those who do not carry the archaic haplotype. (d)  
729 Erhualian sows homozygously carrying the archaic haplotype (QQ) have higher ( $P = 0.0096$ )  
730 TNB\_EBV than heterozygous carriers (qq).

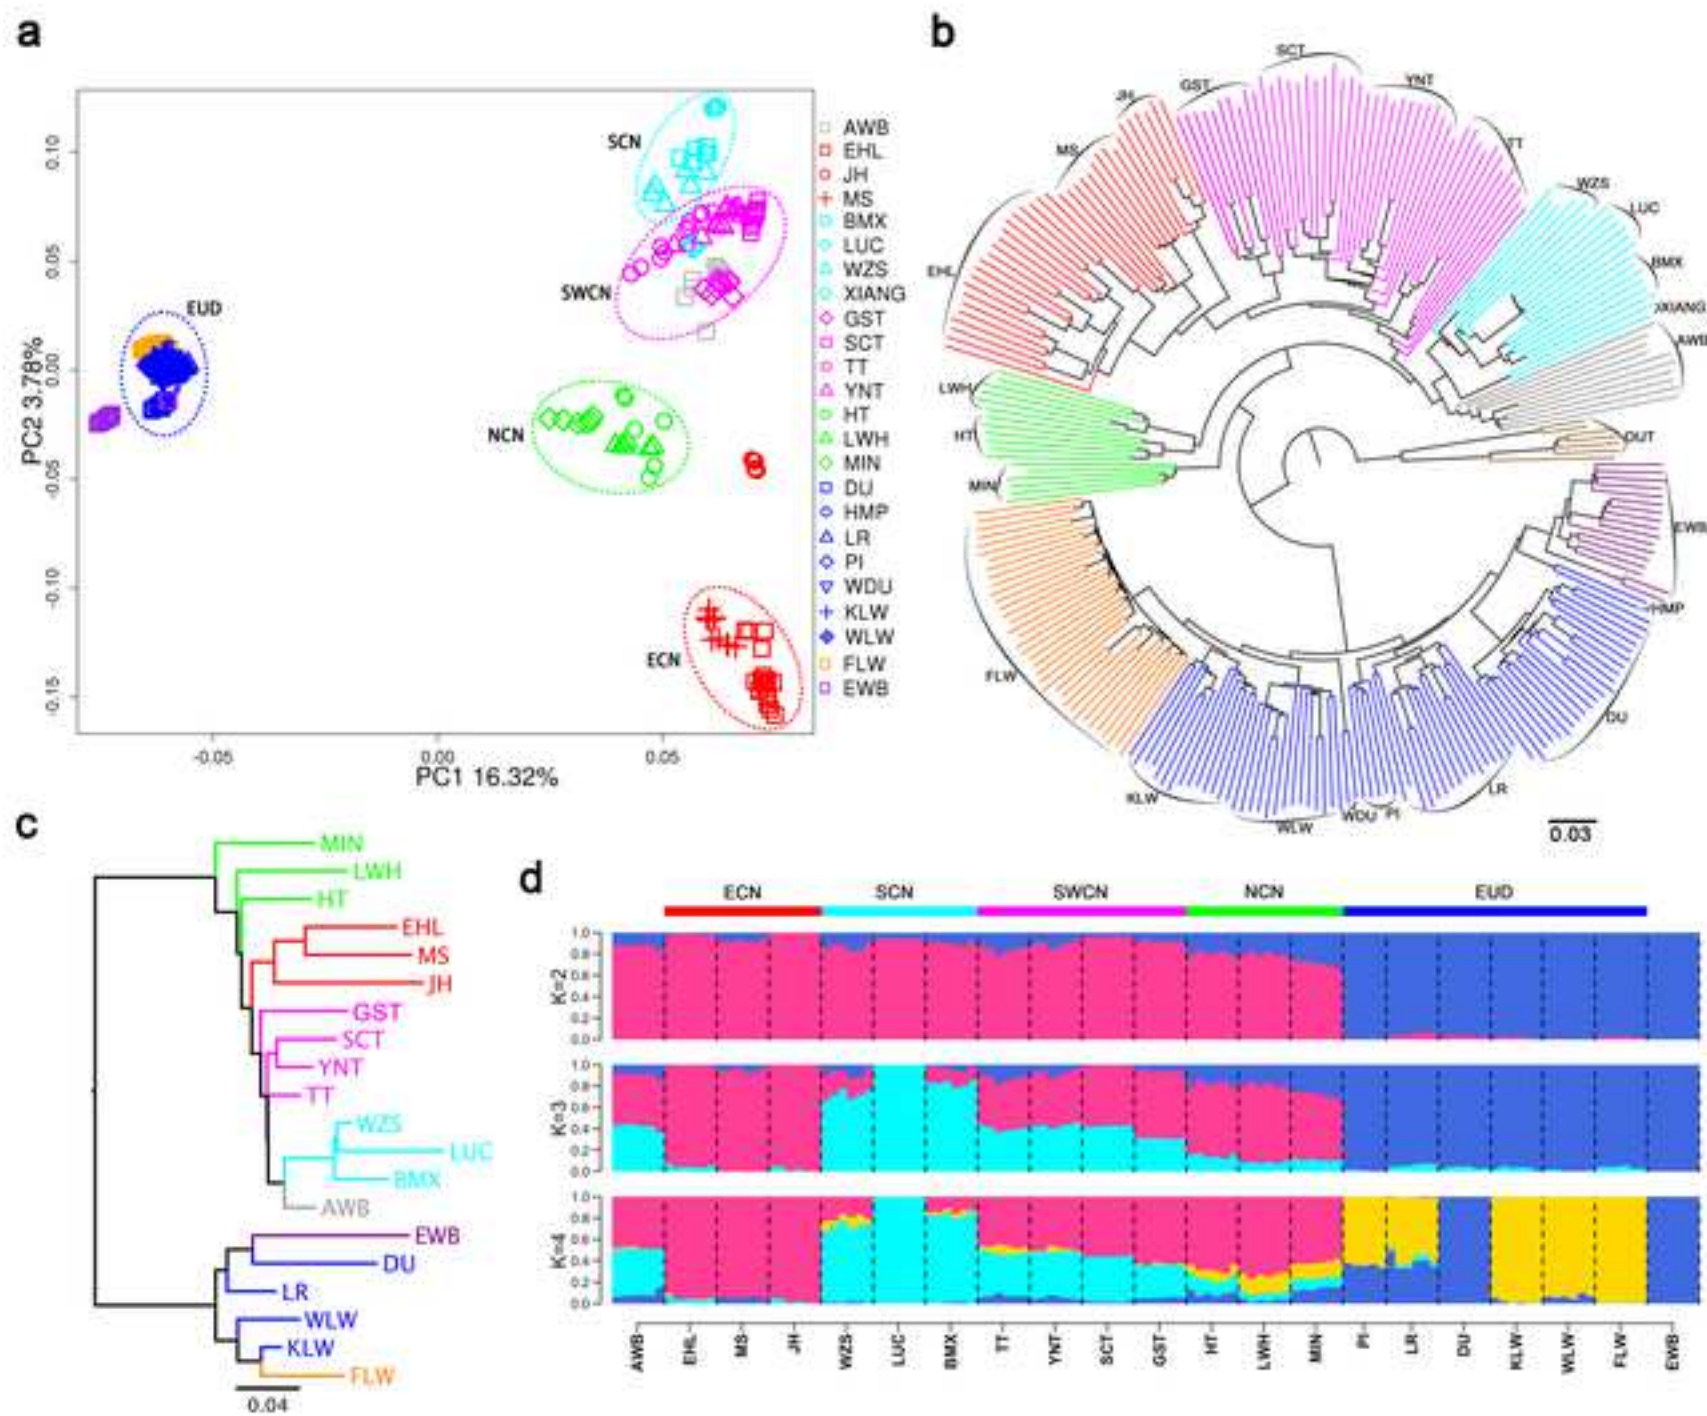

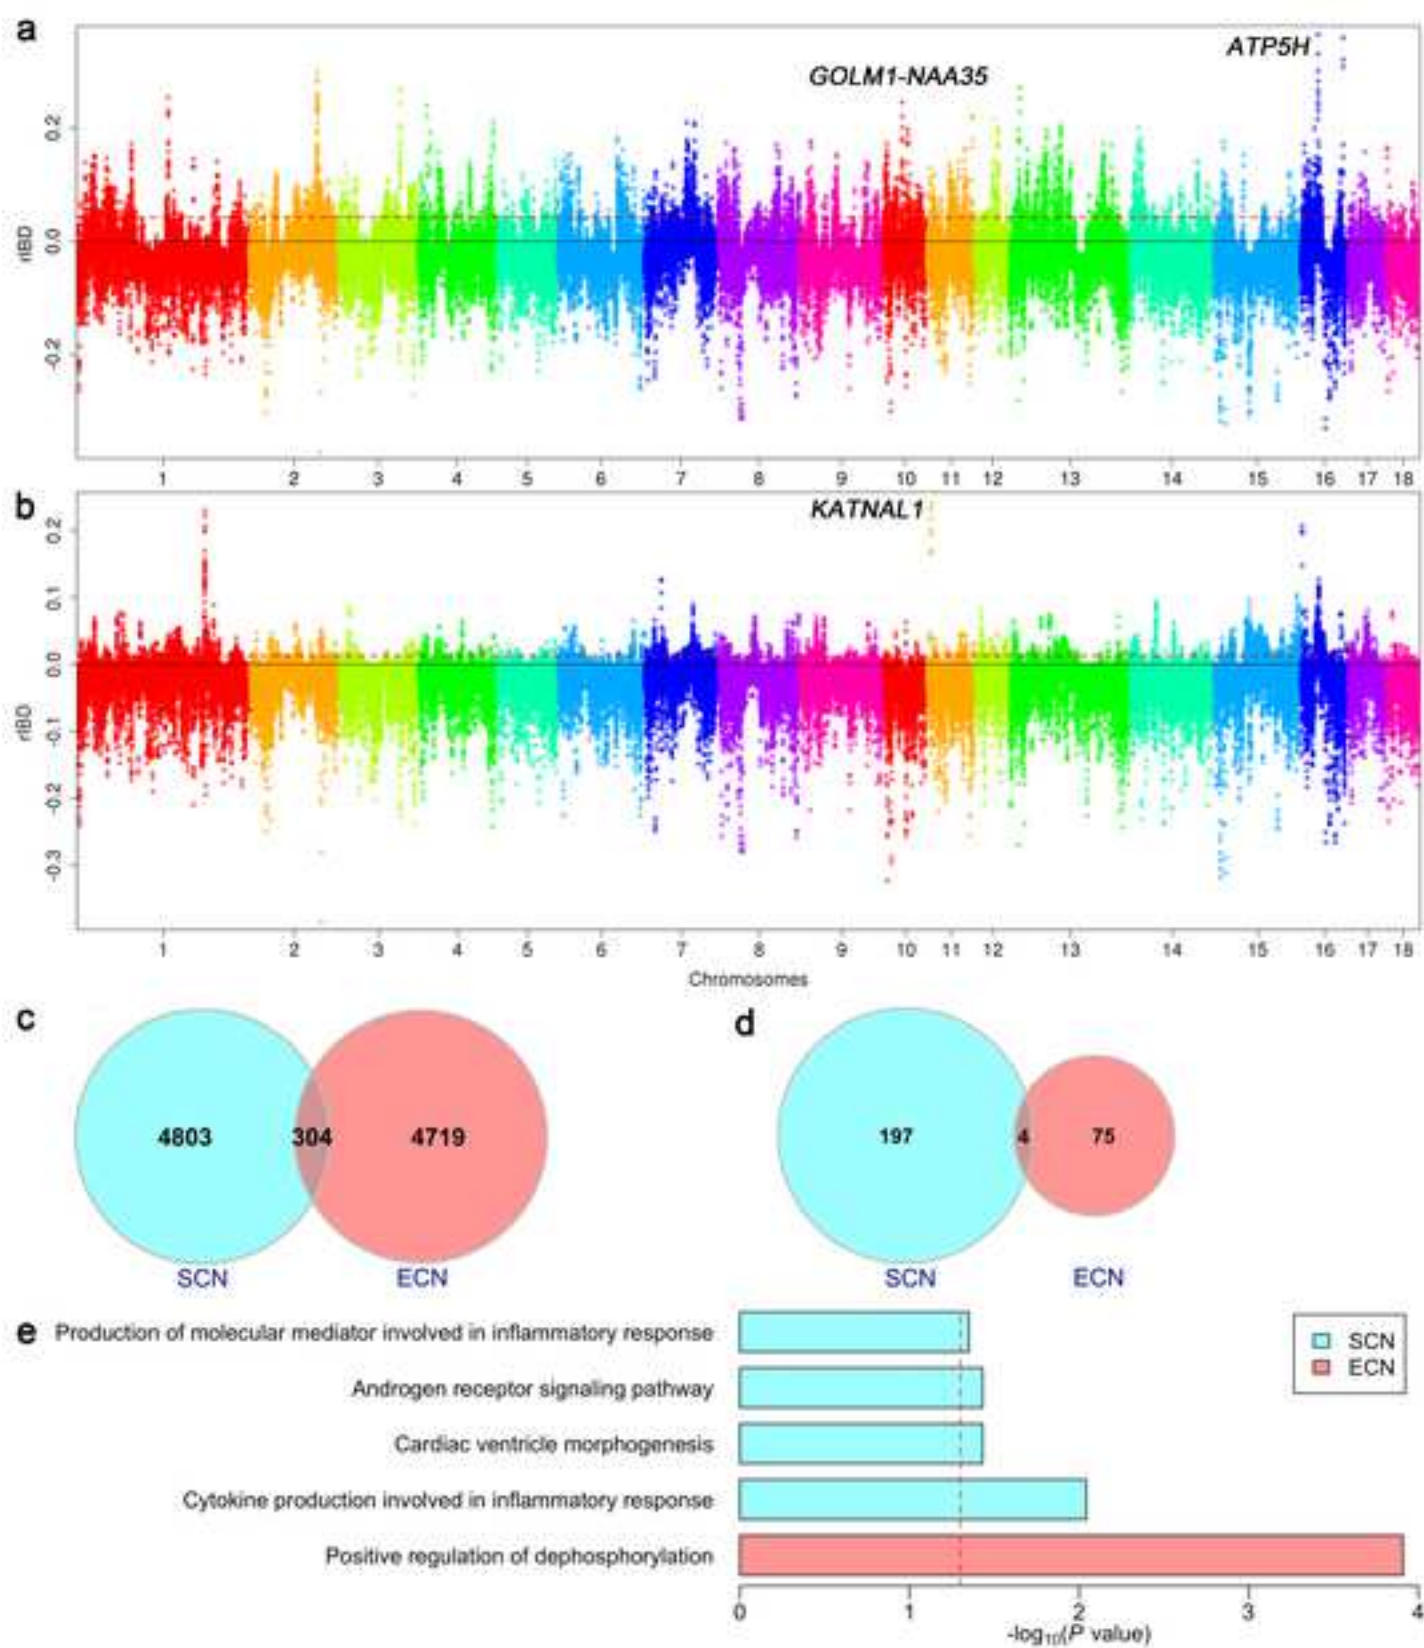



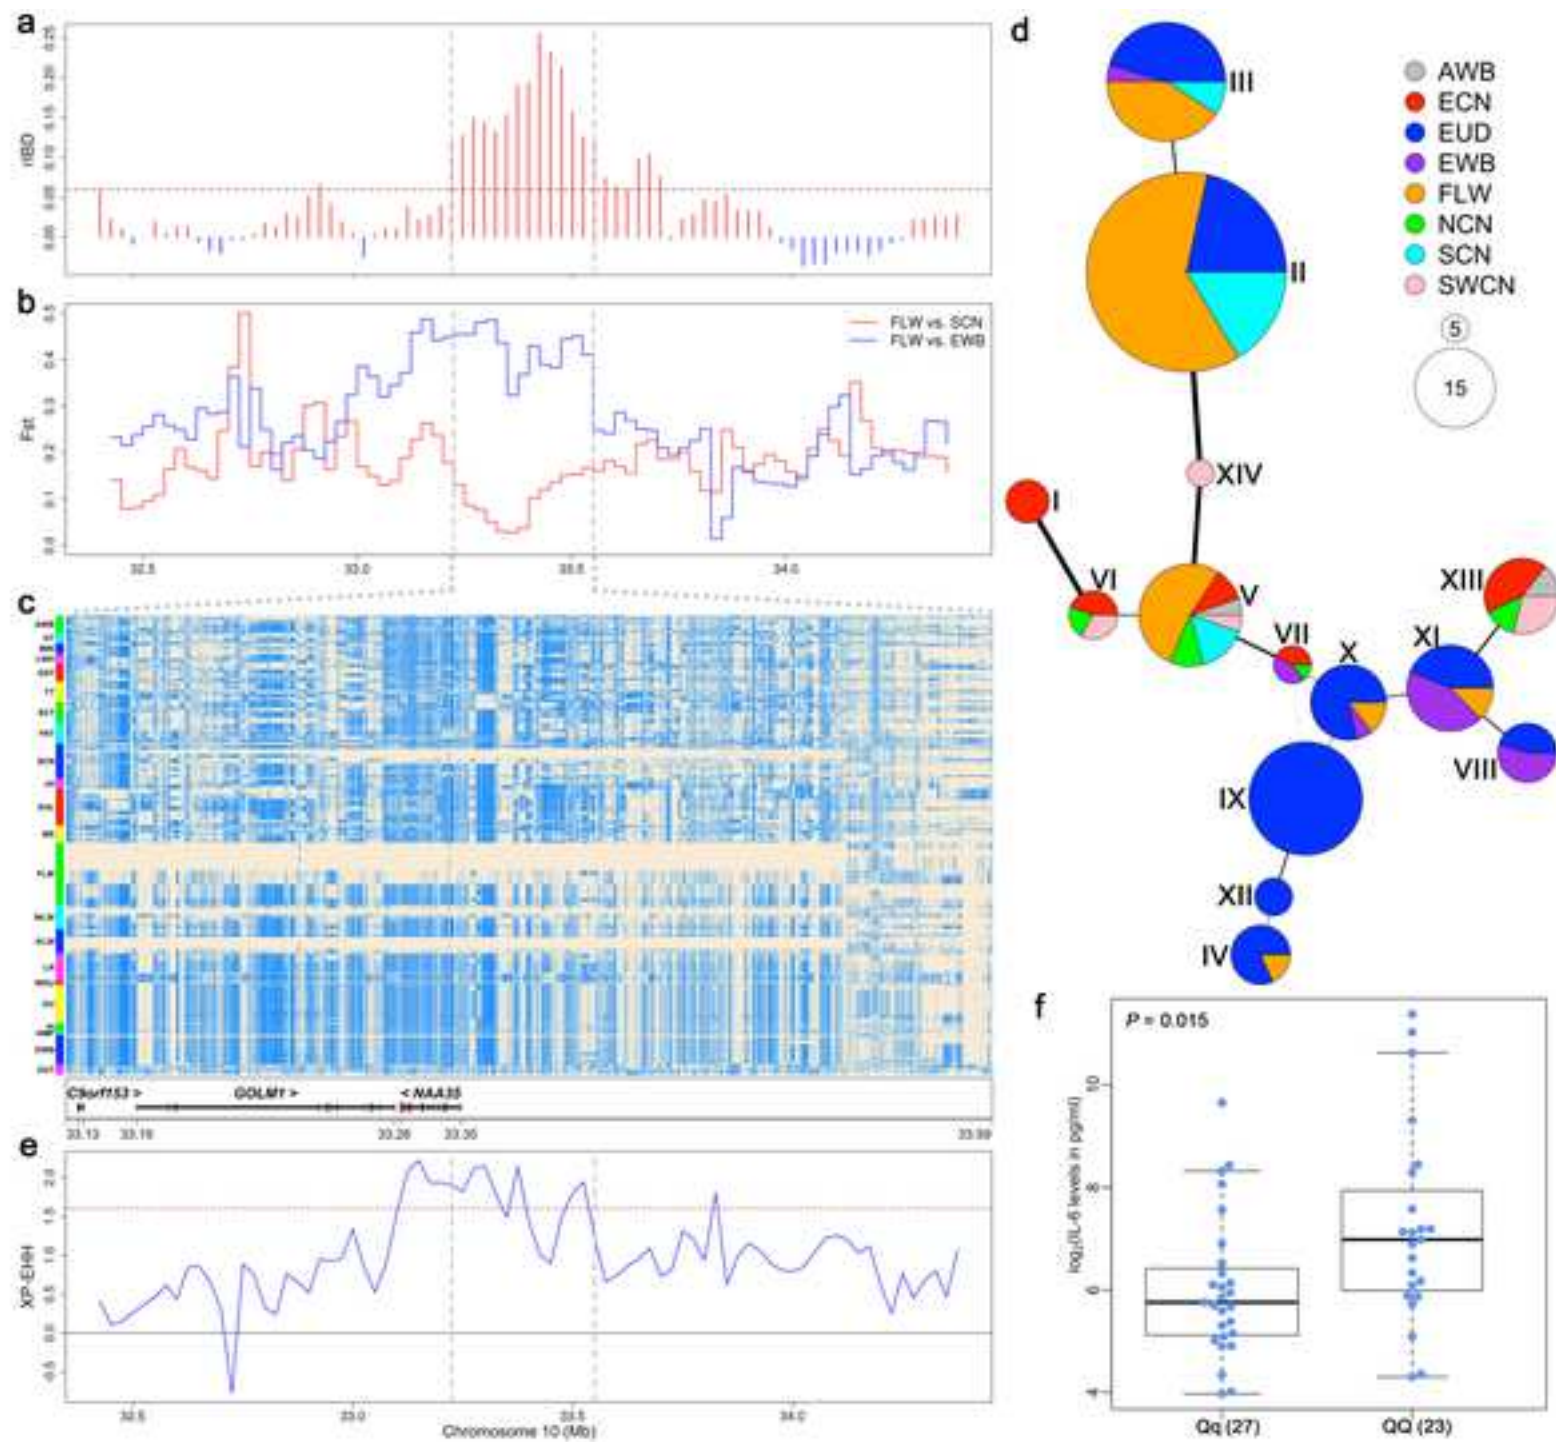

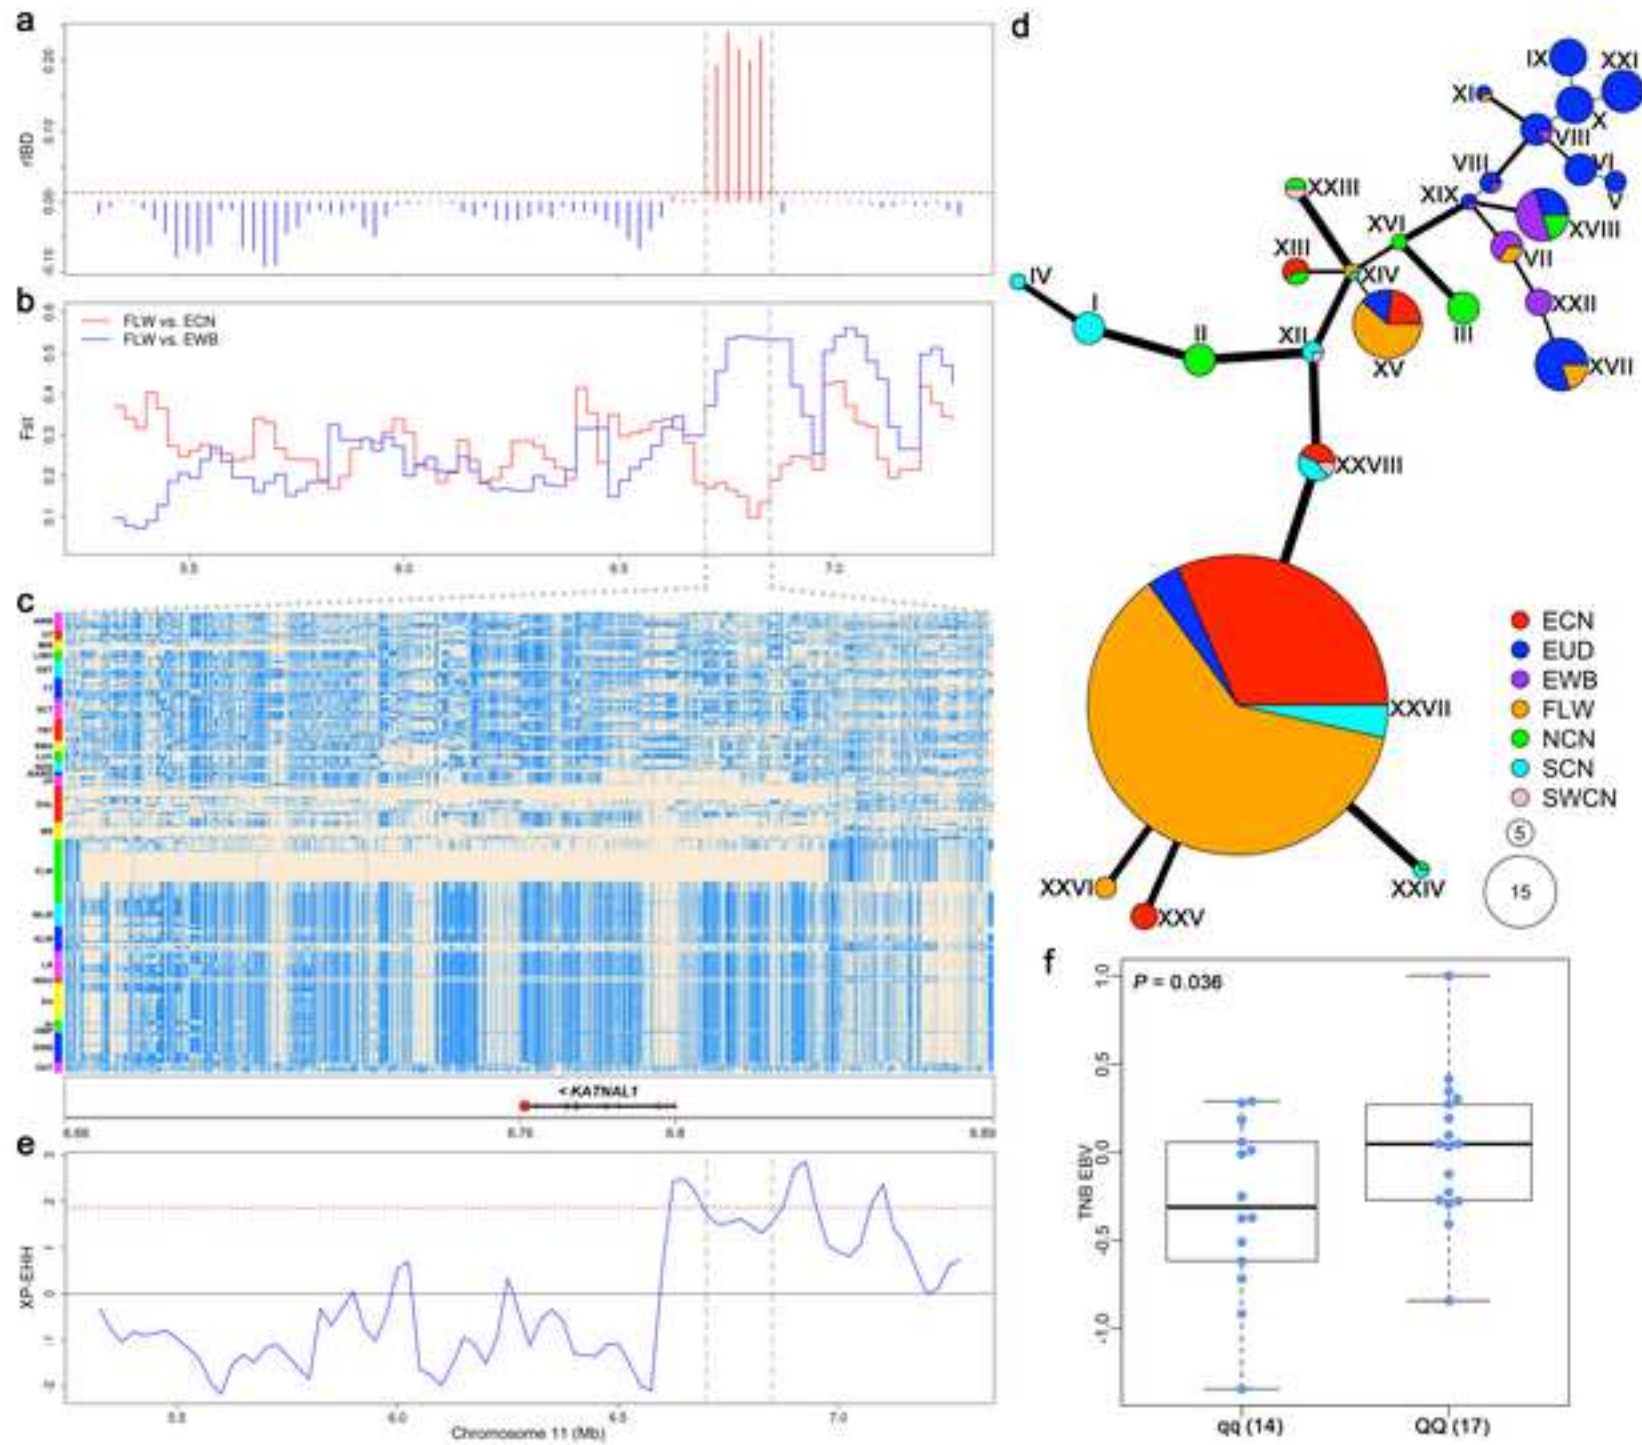



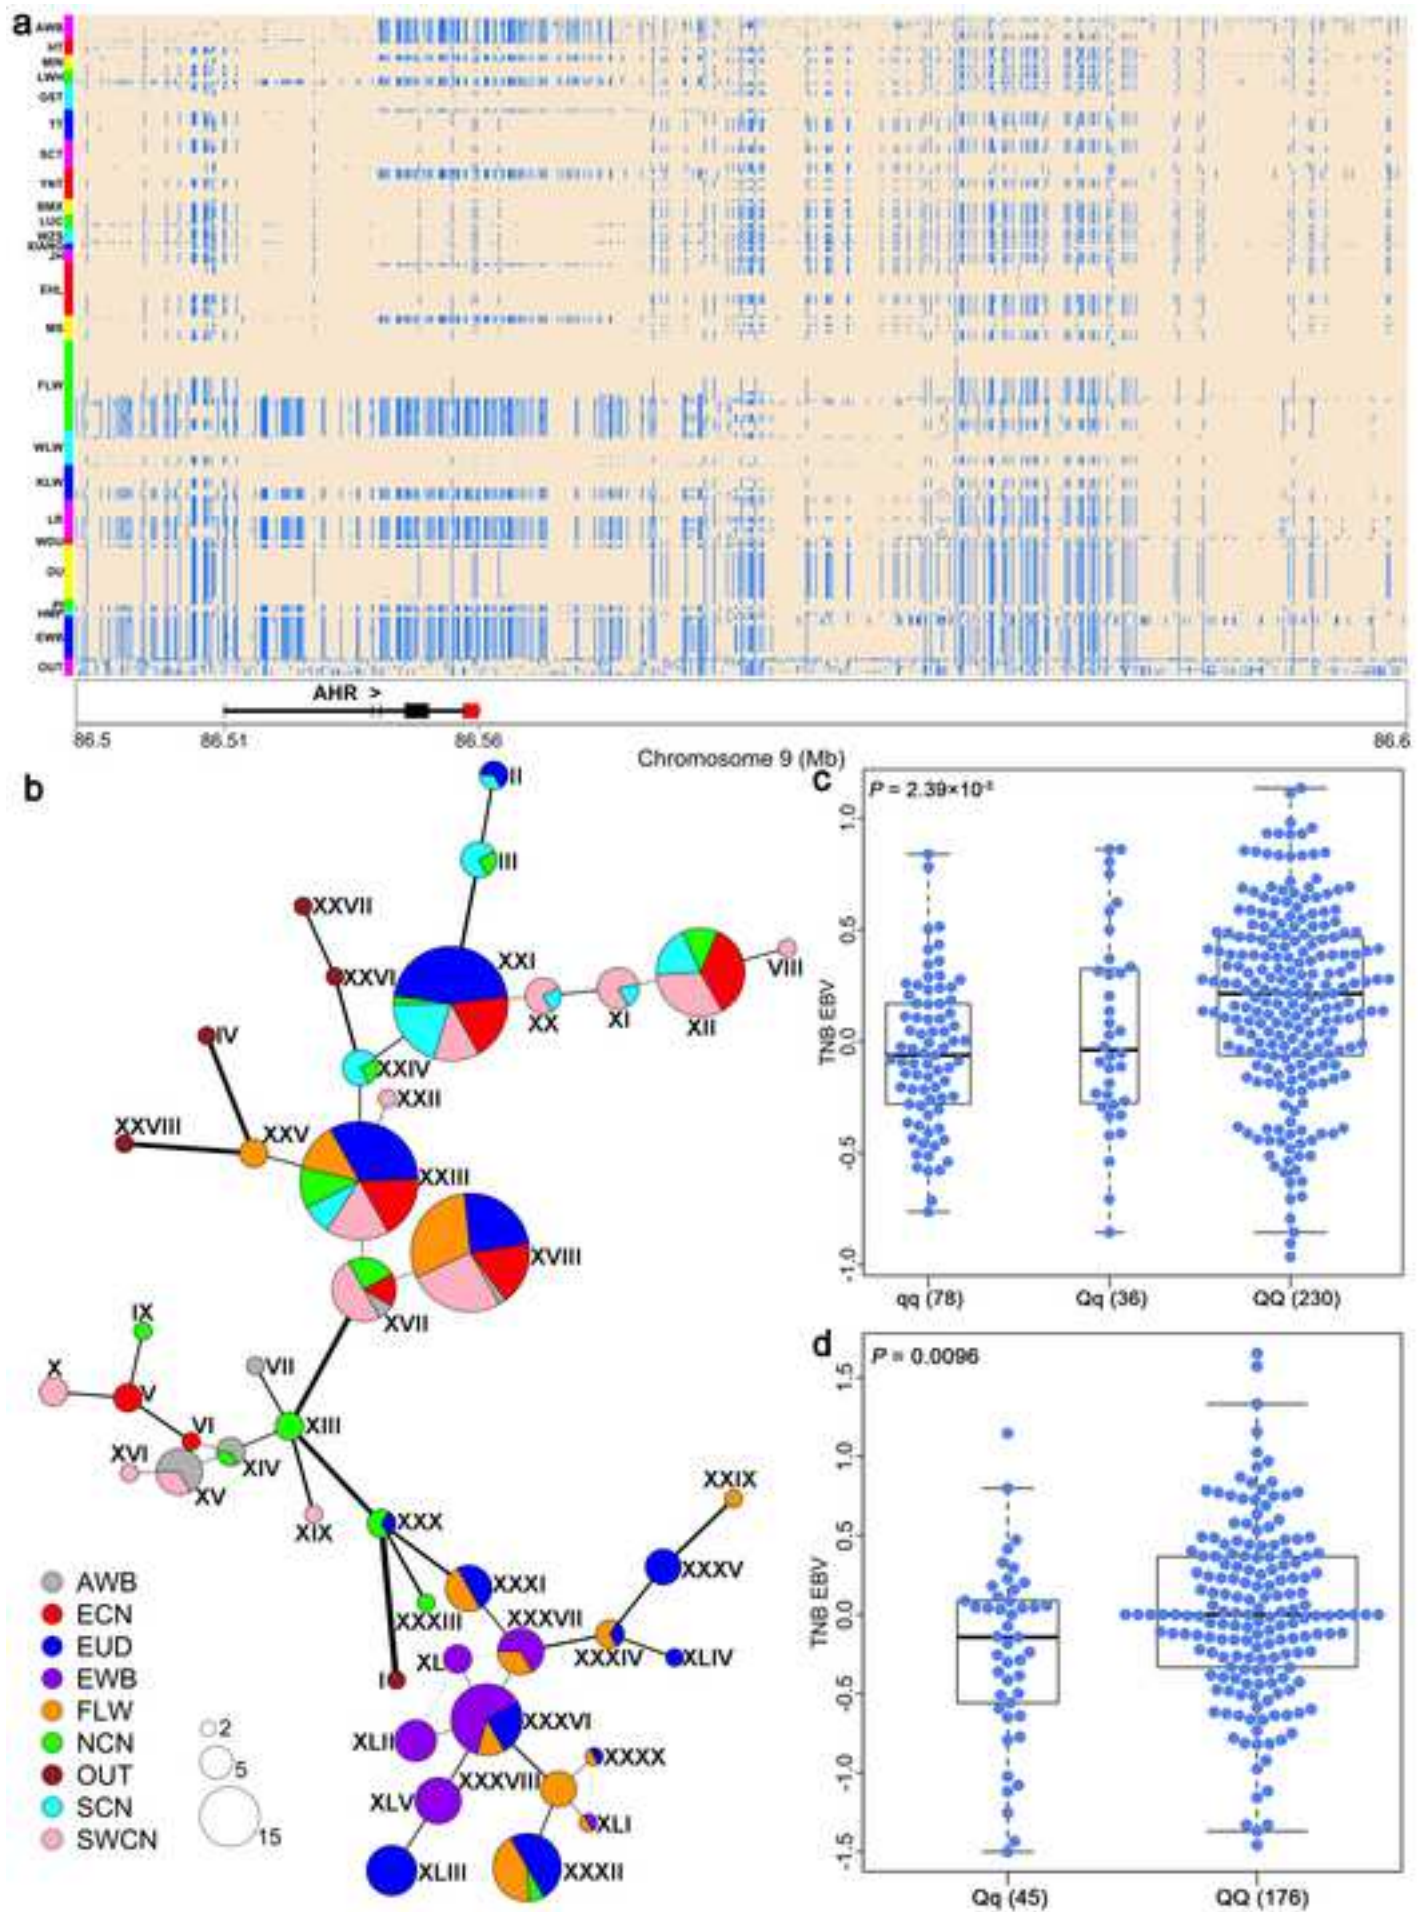

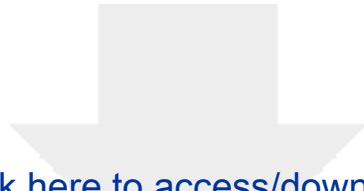

Click here to access/download  
**Supplementary Material**  
Supplementary Information.docx

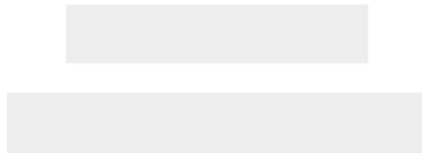





Click here to access/download  
**Supplementary Material**  
Table S2.xlsx



Click here to access/download  
**Supplementary Material**  
Table S3.xlsx



Click here to access/download  
**Supplementary Material**  
Table S6.xlsx



Click here to access/download  
**Supplementary Material**  
Table S7.xlsx



Click here to access/download  
**Supplementary Material**  
Responses letter\_2.docx



Supplement: giaa014_giga-d-19-00160_revision_2.pdf [file giaa014_giga-d-19-00160_revision_2.pdf]
