# Supplementary material for: Introgression of Eastern Chinese and Southern Chinese haplotypes contributes to the improvement of fertility and immunity in European modern pigs
Source: PubMed Central journal article supplement (PMC7059266; doi:10.1093/gigascience/giaa014), 2020-03-06
Supplement: giaa014_giga-d-19-00160_revision_1.pdf [file giaa014_giga-d-19-00160_revision_1.pdf]

## Introgression of Eastern Chinese and Southern Chinese haplotypes contributes to the improvement of fertility and immunity in European modern pigs

--Manuscript Draft--

|                                                      |                                                                                                                                                                                                                                                                                                                                                                                                                                                                                                                                                                                                                                                                                                                                                                                                                                                                                                                                                                                                                                                                                                                                                                                                                                                                                                                                       |               |
|------------------------------------------------------|---------------------------------------------------------------------------------------------------------------------------------------------------------------------------------------------------------------------------------------------------------------------------------------------------------------------------------------------------------------------------------------------------------------------------------------------------------------------------------------------------------------------------------------------------------------------------------------------------------------------------------------------------------------------------------------------------------------------------------------------------------------------------------------------------------------------------------------------------------------------------------------------------------------------------------------------------------------------------------------------------------------------------------------------------------------------------------------------------------------------------------------------------------------------------------------------------------------------------------------------------------------------------------------------------------------------------------------|---------------|
| <b>Manuscript Number:</b>                            | GIGA-D-19-00160R1                                                                                                                                                                                                                                                                                                                                                                                                                                                                                                                                                                                                                                                                                                                                                                                                                                                                                                                                                                                                                                                                                                                                                                                                                                                                                                                     |               |
| <b>Full Title:</b>                                   | Introgression of Eastern Chinese and Southern Chinese haplotypes contributes to the improvement of fertility and immunity in European modern pigs                                                                                                                                                                                                                                                                                                                                                                                                                                                                                                                                                                                                                                                                                                                                                                                                                                                                                                                                                                                                                                                                                                                                                                                     |               |
| <b>Article Type:</b>                                 | Research                                                                                                                                                                                                                                                                                                                                                                                                                                                                                                                                                                                                                                                                                                                                                                                                                                                                                                                                                                                                                                                                                                                                                                                                                                                                                                                              |               |
| <b>Funding Information:</b>                          | National Natural Science Foundation of China (31525023)                                                                                                                                                                                                                                                                                                                                                                                                                                                                                                                                                                                                                                                                                                                                                                                                                                                                                                                                                                                                                                                                                                                                                                                                                                                                               | Prof. Jun Ren |
|                                                      | National Key Research Project of China (2016ZX08006-5)                                                                                                                                                                                                                                                                                                                                                                                                                                                                                                                                                                                                                                                                                                                                                                                                                                                                                                                                                                                                                                                                                                                                                                                                                                                                                | Prof. Jun Ren |
| <b>Abstract:</b>                                     | <p>Pigs were domesticated independently from European and Asian wild boars nearly 10,000 years ago. Chinese indigenous pigs have been historically introduced to improve Europe local pigs. However, the geographic origin and biological functions of introgressed Chinese genes in modern European pig breeds remain largely unknown. Here we explored whole-genome sequencing data from 266 Eurasian wild boars and domestic pigs to produce a fine-scale map of introgression between French Large White (FLW) and Chinese pigs. We show that FLW pigs had historical admixture with both Southern Chinese (SCN) and Eastern Chinese (ECN) pigs approximately 200–300 years ago. Moreover, a set of SCN haplotypes was shown to be beneficial for improving disease resistance and those with ECN haplotypes are favorable for improved reproductive performance in FLW pigs. Intriguingly, we found both human-mediated and archaic introgression events at the AHR locus, at which the archaic haplotype contributes to increased fertility in both ECN and FLW pigs. This study advances our understanding of the breeding history of global domestic pigs and highlights the importance of artificial hybridization and natural archaic introgression in the formation of phenotypic characteristics in domestic animals.</p> |               |
| <b>Corresponding Author:</b>                         | Jun Ren<br><br>CHINA                                                                                                                                                                                                                                                                                                                                                                                                                                                                                                                                                                                                                                                                                                                                                                                                                                                                                                                                                                                                                                                                                                                                                                                                                                                                                                                  |               |
| <b>Corresponding Author Secondary Information:</b>   |                                                                                                                                                                                                                                                                                                                                                                                                                                                                                                                                                                                                                                                                                                                                                                                                                                                                                                                                                                                                                                                                                                                                                                                                                                                                                                                                       |               |
| <b>Corresponding Author's Institution:</b>           |                                                                                                                                                                                                                                                                                                                                                                                                                                                                                                                                                                                                                                                                                                                                                                                                                                                                                                                                                                                                                                                                                                                                                                                                                                                                                                                                       |               |
| <b>Corresponding Author's Secondary Institution:</b> |                                                                                                                                                                                                                                                                                                                                                                                                                                                                                                                                                                                                                                                                                                                                                                                                                                                                                                                                                                                                                                                                                                                                                                                                                                                                                                                                       |               |
| <b>First Author:</b>                                 | Hao Chen                                                                                                                                                                                                                                                                                                                                                                                                                                                                                                                                                                                                                                                                                                                                                                                                                                                                                                                                                                                                                                                                                                                                                                                                                                                                                                                              |               |
| <b>First Author Secondary Information:</b>           |                                                                                                                                                                                                                                                                                                                                                                                                                                                                                                                                                                                                                                                                                                                                                                                                                                                                                                                                                                                                                                                                                                                                                                                                                                                                                                                                       |               |
| <b>Order of Authors:</b>                             | Hao Chen                                                                                                                                                                                                                                                                                                                                                                                                                                                                                                                                                                                                                                                                                                                                                                                                                                                                                                                                                                                                                                                                                                                                                                                                                                                                                                                              |               |
|                                                      | Min Huang                                                                                                                                                                                                                                                                                                                                                                                                                                                                                                                                                                                                                                                                                                                                                                                                                                                                                                                                                                                                                                                                                                                                                                                                                                                                                                                             |               |
|                                                      | Bin Yang                                                                                                                                                                                                                                                                                                                                                                                                                                                                                                                                                                                                                                                                                                                                                                                                                                                                                                                                                                                                                                                                                                                                                                                                                                                                                                                              |               |
|                                                      | Zhongping Wu                                                                                                                                                                                                                                                                                                                                                                                                                                                                                                                                                                                                                                                                                                                                                                                                                                                                                                                                                                                                                                                                                                                                                                                                                                                                                                                          |               |
|                                                      | Zheng Deng                                                                                                                                                                                                                                                                                                                                                                                                                                                                                                                                                                                                                                                                                                                                                                                                                                                                                                                                                                                                                                                                                                                                                                                                                                                                                                                            |               |
|                                                      | Yong Hou                                                                                                                                                                                                                                                                                                                                                                                                                                                                                                                                                                                                                                                                                                                                                                                                                                                                                                                                                                                                                                                                                                                                                                                                                                                                                                                              |               |
|                                                      | Jun Ren                                                                                                                                                                                                                                                                                                                                                                                                                                                                                                                                                                                                                                                                                                                                                                                                                                                                                                                                                                                                                                                                                                                                                                                                                                                                                                                               |               |
|                                                      | Lusheng Huang                                                                                                                                                                                                                                                                                                                                                                                                                                                                                                                                                                                                                                                                                                                                                                                                                                                                                                                                                                                                                                                                                                                                                                                                                                                                                                                         |               |
| <b>Order of Authors Secondary Information:</b>       |                                                                                                                                                                                                                                                                                                                                                                                                                                                                                                                                                                                                                                                                                                                                                                                                                                                                                                                                                                                                                                                                                                                                                                                                                                                                                                                                       |               |
| <b>Response to Reviewers:</b>                        | Louis Bernatchez                                                                                                                                                                                                                                                                                                                                                                                                                                                                                                                                                                                                                                                                                                                                                                                                                                                                                                                                                                                                                                                                                                                                                                                                                                                                                                                      |               |

Associate Editor, GigaScience

Oct 17, 2019

Dear Dr. Louis Bernatchez,

We are grateful to your and the reviewers' comments on our manuscript entitled "Population genomic data reveal origin and phenotypic effect of Chinese haplotypes introgressed into European modern pigs" (Manuscript ID: GIGA-D-19-00160). We greatly appreciate the opportunity to further revise this manuscript.

According to your suggestions, our article was polished by a professional editing company and we believe that the readability of the polished article has been greatly improved. In addition, we revised this paper on the basis of the two reviewers' comments. For details, please see our point-to-point response to these comments. All revisions are indicated in red in the manuscript. We have collected Authors' ORCIDs, including Hao Chen (0000-0002-5210-8924), Min Huang (0000-0001-9933-012X), Bin Yang (0000-0002-0689-0628), Zhongping Wu (0000-0001-5246-5190), Yong Hou (0000-0002-1351-9288) and Jun Ren (0000-0001-6664-3998). We did not develop new software and thus did not have RRIDs. According to your suggestion, we presented the 50-kb regions of introgression in supplementary tables 2 and 3.

We sincerely hope that the revised manuscript would satisfy you and the two reviewers and can be accepted for publication. Please do not hesitate to contact me if you have any other questions or comments.

Best regards,

Jun Ren

Reviewer #1

The paper describes interesting analyses on the origin and extend of Asian introgression into European commercial pig breeds. The amount of work is impressive and significantly contributes to our understanding of past introgression and persistence of haplotypes in European breeds. However, I had various questions about the methodology that I could not find the answer to in the paper. I also have some other issues that I think should be addressed before the manuscript can be considered for publication.

Response: Thank you for your positive comments. We have revised this paper on the basis of your comments.

The use of the English language is not always appropriate throughout the paper. Although it does not influence the overall readability and clarity of the message, I do think the manuscript will benefit from careful editing.

Response: According to this suggestion, our manuscript was polished by a professional editing company, LetPub ([www.letpub.com](http://www.letpub.com)).

The level of detail about the methodology is very inconsistent. Some analyses are described in much detail, whereas other analyses lack detail and cannot be reproduced. I think it is crucial to read through the methods again and add all details that will enable the readers to repeat the analysis. For example, details about how the haplotypes were constructed in the various haplotype plots using the pegas package should be provided. How many SNPs were used with which filtering, how was the phasing done, the distances calculated, etc.. Also, the results from the ALDER analyses should be shown somewhere (perhaps in the supplements?) because now it is too vague how the inference of 200-300 years was obtained.

Response: Thank you for your suggestion. We presented a more detailed description of the methodology in the revised manuscript. We also submitted all essential codes and files of the methodology to the GigaDB temporary ftp site (<ftp://user14@parrot.genomics.cn>, username = user14, password = JunCNPig). For details, please see the readme text file. We provided details of the methods for haplotype reconstruction and estimation of admixture time. For your convenience, we show the relevant sentences as below:

"We also constructed haplotype networks using SNPs with a MAF of greater than 0.05 and call rates of greater than 90% at the GOLM1-NAA3 (298 SNPs), KATNAL1 (529 SNPs) and AHR (68 SNPs) loci. We explored the fastPhase function with 1000 iterations in Beagle v4.0 [39] to phase haplotypes and used the "haploNet" command

in the R package “pegas” [40] to calculate the pairwise differences between haplotypes. We selected SNPs with an MAF of greater than 0.05, a call rate of greater than 90% and an LD ( $r^2$ ) < 0.3 using PLINK v1.9 [27], and then explored the selected SNPs to estimate the admixture time between populations via ALDER v1.0.3 under default parameters [13]. In short, we used the “convert” function in EIGENSTRAT [41] to convert the data format. We set FLW as a mixed population, EWB and SCN as one reference population, EWB and ECN as another reference population, and five years as one generation.”

The reference genome assembly 10.2 was used, however the updated assembly 11.1 was produced in January 2017 already (<https://www.biorxiv.org/content/10.1101/668921v1>). Especially the GOLM1-NAA35 and the AHR region occurred on multiple contigs and contained a gap nearby in 10.2, whereas 11.1 contains a single contig at that locus. I understand that redoing all the analyses on the new build requires a lot of work, but at some point we should move forward, especially if it improves the results. Perhaps a comparison could be made for specific loci?

Response: To address this concern, we mapped three representative regions including the GOLM1-NAA35, KATNAL1 and AHR loci to the Sscrofa11.1 reference genome assembly, and made a comparison of tag SNPs and interval positions at these loci on the two reference genome assemblies (10.2 vs. 11.1). For example, we present the positions of the three regions in both Sscrofa10.2 and Sscrofa11.1 in the main text. We also show the positions of tag SNPs for reconstructing GOLM1-NAA35 and KATNAL1 haplotypes in both Sscrofa10.2 and Sscrofa11.1 at the footnote of supplementary tables 6, 7, 8 and 9.

The rIBD in figure 2a seems to highly overestimate the proportion of Asia-derived haplotypes in the FLW. This seems impossible, given the admixture plot and PCA in figure 1. What were the settings for the fastIBD analysis? I could not find these in the methods. I assume the statement “We detected 5,107 and 5,024 50-kb regions with signatures of potential introgression from SCN or ECN pigs into FLW pigs, respectively” is therefore not correct, but these numbers rather reflect the bins in the far-right tail.

Response: As mentioned in the Method section, we conducted genome scans for regions of potential introgression using sliding windows of 50 kb with a step size of 25 kb. We calculated rIBD values for each window via IBD fragments that were iterated 10 times. As you assumed, the 5,107 and 5,024 50-kb regions are in the far-right tail of 5% empirical distribution. We defined these regions as the regions of potential introgression from SCN or ECN pigs into FLW pigs. Some of these regions are overlapped, corresponding to 4,803 and 4,719 non-overlapped regions, respectively. These regions are 240 Mb and 236 Mb in length, accounting for 8.9% and 8.7% of the total length of the pig genome (2.7G). The Asian fractions (8.9% and 8.7%) are roughly comparable to those in FLW as revealed by the ADMIXTURE analysis. Please see Figure 1d. Hence, the rIBD in figure 2a did not highly overestimate the proportion of Asia-derived haplotypes in the FLW.

Line 282: “with a strong introgression signal at the AHR locus (SSC9: 92.25-97.45 Mb)”. I don't think this is a strong introgression signal, you have some peaks that stand out much stronger. What made you decide to focus on this locus?

Response: Boss et al. reported that the AHR region was one of the longest regions of introgression from Chinese pigs to Large White pigs, and an Asian-derived missense mutation in the AHR gene was significantly associated with litter size in Large White pigs (Nature Communication, 2014, doi: 10.1038/ncomms5392). Hence, we focused on this locus by using it as a proof of concept. We confirmed the significant association at this locus and then made a close examination on it, which enabled us to clarify the origin of the favorable haplotype for fertility.

Looking at the clustering, the sampled wild boar clearly represents the SCN lineage rather than ECN. Without this wild background leading to the ECN domestic lineage, it is impossible to assign the AHR haplotype to an external lineage such as the other *Sus* species.

Response: The clustering patterns indicate that the sampled wild boars ( $n = 10$ ) have a closer genetic relationship with SCN pigs as compared to ECN pigs. Nevertheless, we did not think that these wild boars represent the SCN lineage. The ADMIXTURE

analysis show that ECN and SCN pigs represent two ancient lineages of Chinese indigenous pigs when  $K = 3$  to 4. The wild boars show a mixture of the two ancient lineages. Please see Figure 1d. In fact, two and four of the 10 sequenced wild boars were sampled from Zhejiang province in Eastern China and Jiangxi province in Central China, respectively.

The clustering of one Chinese wild boar haplotype within the French Large white AHR haplotype group also suggests the occurrence of this haplotype in wild boar - although perhaps at low frequency.

Response: It is known that domestic pigs had recurrent hybridization with wild boars after domestication (Nature Genetics, 2015, doi: 0.1038/ng.3394). Given the very low frequency (1/20) of this haplotype in wild boars, we believe that the occurrence of this haplotype in wild boar is most likely due to gene flow between domestic pigs and wild boars.

You filtered out SNPs in 266 individuals with a MAF less than 0.01 -> this will remove many OUT-specific alleles. What would happen to the haplotype distances if you do include species-specific alleles, and how does that influence your conclusions?

Response: We agree with your opinion that a proportion of OUT-specific alleles will be removed under the filtering criteria of MAF less than 0.01. On the other side, this filtering criteria has been widely adopted to reduce the risk of sequencing errors especially when a limited number of samples were analyzed (Nature Genetics. doi:10.1038/s41588-018-0250-5 for example). We assume that haplotype distances between OUT and domestic pigs will be increased if we include species-specific alleles. When we analyzed the KATNAL1 locus, we did not include OUT haplotypes due to their low frequencies (Figure 4). To avoid potential bias, we removed OUT haplotypes at the GOLM1-NAA35 locus and present a new version of Figure 3 and Figure S6. From the two new figures, you can see that the deletion of the OUT haplotypes did not affect our result. At the AHR locus, the most frequent haplotype (XVI) appeared 100 times in all 266 sequenced individuals, including 30 FLW pigs, 24 other LW pigs, 18 EHL pigs and 26 in Tibetan pigs. This haplotype together with the OUT haplotype XII formed a major haplotype group, which was divergent from another two major haplotype groups from Eurasian wild boars and domestic pigs (fig. 5b). This pattern apparently conforms to the archaic introgression assumption. Altogether, our conclusion is not affected by filtering out SNPs with MAF of less than 0.01 in 266 individuals.

Regions of lower recombination can create outlier signals because of drift, this potential bias should be discussed

Response: We agree with this comment. Low recombination and genetic drift are two factors that cause reduced genetic variability at target regions, i.e. potential bias of selection signature.

The discussion section could better be read as some sort of conclusion, because lots of discussion is already provided in the results section (for example, line 211-221). I do like this structure (as in the discussion by section rather than discussion of all findings at the end) but it should be stated in the headers.

Response: Thank you for your suggestion. We added two headers for the two subsections of Discussion. One is entitled "Introgression of both SCN and ECN pig DNA contributed to the genetic improvement of European modern pig breeds" and another is entitled "Both naturally occurring interspecies hybridization and human-driven crossbreeding played important roles in the development of global pig breeds".

Why is the highest peak, ATP5H, indicated in figure 2, but not discussed??

Response: As shown in Figure 2, the ATP5H region displayed the strongest signature of introgression from SCN pigs into FLW pigs. However, we did not detect significant selection signals in this region, neither between FLW and European wild boars (Figure 1a) nor between FLW and Large White pigs from other countries (Figure 1b) via the XP-EHH approach. This indicates that the ATP5H region did not experience directional selection after the introgression event and thus did not contribute to the selective breeding of FLW pigs. For this reason, we did not discuss about the ATP5H region.

Figure 1. Selection signals in the ATP5H region unraveled by the XP-EHH analysis. (a) Signals between FLW and European wild boars. (b) Signals between FLW and Large

White pigs from other countries. The red dashed line indicates the 5% threshold line. The pink shaded area represents the ATP5H region.

Different coloration in figS12a and figS12b is confusing (the European wild).  
Response: Corrected.

Why does one EWB cluster with the EUD in fig 1a?

Response: In fact, two European wild boars cluster with the EUD in an overlapped way in the PC1 and PC2 plots (Fig. 1a). The two wild boars were sampled from the Samos island of Greek. We assume that they had a considerable proportion of genetic components of the EUD due to gene flow as mentioned above. We further conducted PC3 and PC4 analyses for all sampled pigs. In the PC3 and PC4 plots, the two individuals cluster with other European wild boars. For details, please see the below figure. In addition, the two individuals together with the other European wild boars define a branch separating from the EUD in the NJ tree (Fig 1b).

Figure 2. Principal component analysis (PCA) of Chinese and European pigs.

Was the t-test the most appropriate test for the haplotype association analysis? What about potential family relationships that could bias the outcome?

Response: We used EBV values of TNB as phenotypic traits for the association test at the KATNAL1 and AHR loci. The EBV values were calculated using the DMU software that treated family relationships, estrus, year, season, parity and pregnancy duration as fixed effects in the statistical model. For the association test at the GOLM1-NAA35 locus, we collected blood samples from unrelated Tibetan pigs that did not have common ancestors within three generations. Hence, we believe that potential family relationships did not bias the outcome.

How were the tagged SNPs for the haplotype association analyses selected?

Response: We explored the Beagle software to phase haplotypes at target loci and selected the least number of SNPs as tagged SNPs that can distinguish all haplotypes at the target loci through their genotypes. For instance, all KATNAL1 haplotypes in FLW pigs can be inferred using the genotypes of the eight tagged SNPs that we selected. For details, please see the figure shown below.

Figure 3. The eight tagged SNPs for phasing KATNAL1 haplotypes in FLW pigs.

Reviewer #2:

Chen et al. in their manuscript "Population genomic data reveal origin and phenotypic effect of Chinese haplotypes introgressed into European modern pigs" performed a thorough analysis explaining the introgression history of Chinese pigs from two distinct locations - Southern (SCN) and East (ECN) China - into an European breed, French Large White (FLW). The authors unravel introgression signatures from ECN and SCN and link them to immunity and reproductive traits respectively. They expand in two examples, the GOLM1-NAAR35 haplotype and the KATNAL1. Finally, they shed light in to the AHR introgressed haplotype introgressed from ECN pigs into Large-White pigs however showing that the AHR haplotype derived from ancient pig species. I consider this a very well written article of clear relevance to the field.

Response: We greatly appreciate your positive comments on our manuscript.

The authors mention Bosse et al. Nature Communications 2014 analysis as the pipeline used in their manuscript. In Bosse the authors use an independent method to verify gene flow between pig populations, namely D-statistics. Do the authors think that D-statistics in here would provide more robustness to their analysis?

Response: Yes, we agree that D-statistics would provide more robustness to our analysis. Bosse et al. also explored the rIBD approach to detect genomic signatures of introgression. We adopted this approach to uncover the introgression signals across the genome in this study. We further used complementary analyses including Fst, haplotype network and heatmap to obtain additional evidence for the introgression conclusion at the GOLM1-NAAR35, KATNAL1 and AHR loci

Page 6 Line 120: ECN pigs represented by Jinhua pigs and SCN pigs represented by Luchuan pigs appeared as the two ancestral lineages of Chinese pigs when K=3 (fig. 1d). Please consider adding ... Jinhua pigs (JH) ...

|                                                                                                                                                                                                                                                                                                                                                                                                                                    |                                                                                                                                                                                                                                                                                                                                                                                                                                                                                                                                                                                                                                                                                                                                                                                                                                                                                                                                                                                                                                                                                                                                                                                                                                                                                                                                                                                                                                                                                                                                                                                                                                                                                                                                                                                                                                                                                                                                                                                                                                                 |
|------------------------------------------------------------------------------------------------------------------------------------------------------------------------------------------------------------------------------------------------------------------------------------------------------------------------------------------------------------------------------------------------------------------------------------|-------------------------------------------------------------------------------------------------------------------------------------------------------------------------------------------------------------------------------------------------------------------------------------------------------------------------------------------------------------------------------------------------------------------------------------------------------------------------------------------------------------------------------------------------------------------------------------------------------------------------------------------------------------------------------------------------------------------------------------------------------------------------------------------------------------------------------------------------------------------------------------------------------------------------------------------------------------------------------------------------------------------------------------------------------------------------------------------------------------------------------------------------------------------------------------------------------------------------------------------------------------------------------------------------------------------------------------------------------------------------------------------------------------------------------------------------------------------------------------------------------------------------------------------------------------------------------------------------------------------------------------------------------------------------------------------------------------------------------------------------------------------------------------------------------------------------------------------------------------------------------------------------------------------------------------------------------------------------------------------------------------------------------------------------|
|                                                                                                                                                                                                                                                                                                                                                                                                                                    | <p>Response: Corrected.</p> <p>Page 6 Line 129: We detected 5107 and 5024 50-Kb regions with signatures of potential introgression from SCN or ENC pigs into FLW pigs. To help follow-up studies it would be convenient to report an excel table with the set of detected regions with potential signatures of introgression, and not only the seven with "strong signatures of introgression" (supplementary Table 2).</p> <p>Response: According to your suggestion, we present two supplementary tables that provide details for the 5170 (supplementary Table 2) and 5024 (supplementary Table 3) 50-kb regions with signatures of potential introgression from SCN or ENC pigs into FLW pigs.</p> <p>Page 30 Line 704: Fig1. Population relationship and structure. (a) Neighbour-joining (NJ) tree based on an identity-by-state matrix among individuals. (b) Principal component analysis (PCA) of Chinese and European pigs. The figure shows in panel (a) the PCA analysis and in panel (b) the NJ tree.</p> <p>Response: Thank you for your reminding. We have corrected this error.</p> <p>Supplementary Figure 3. The colored dashed in the phylogenetic tree represent different genetic groups. Some clarifications or legends on that would be much appreciated, SCN, ECN, NCN...</p> <p>Response: According to this comment, we have added clarifications for SCN, ECN, SWCN, NCN and EUD in the new version of Supplementary Figure 3.</p> <p>Page 7 Line 36. SCN pigs and ECN pigs were enriched in the immune-related signalling and fertility pathways, respectively (fig. 2e). ECN genes are related to "positive regulation of dephosphorilation", is that related to fertility?</p> <p>Response: Yes.</p> <p>Page 15 Line 335. Better clarification on FLW pigs versus OUT animals were only 1.51 and 1.41, respectively (supplementary fig S13).</p> <p>Response: Done. Please see the new version of Supplementary Figure 13</p> <p>Supplementary Figure 12 is not mentioned in the text.</p> <p>Response: Added.</p> |
| <b>Additional Information:</b>                                                                                                                                                                                                                                                                                                                                                                                                     |                                                                                                                                                                                                                                                                                                                                                                                                                                                                                                                                                                                                                                                                                                                                                                                                                                                                                                                                                                                                                                                                                                                                                                                                                                                                                                                                                                                                                                                                                                                                                                                                                                                                                                                                                                                                                                                                                                                                                                                                                                                 |
| <b>Question</b>                                                                                                                                                                                                                                                                                                                                                                                                                    | <b>Response</b>                                                                                                                                                                                                                                                                                                                                                                                                                                                                                                                                                                                                                                                                                                                                                                                                                                                                                                                                                                                                                                                                                                                                                                                                                                                                                                                                                                                                                                                                                                                                                                                                                                                                                                                                                                                                                                                                                                                                                                                                                                 |
| Are you submitting this manuscript to a special series or article collection?                                                                                                                                                                                                                                                                                                                                                      | No                                                                                                                                                                                                                                                                                                                                                                                                                                                                                                                                                                                                                                                                                                                                                                                                                                                                                                                                                                                                                                                                                                                                                                                                                                                                                                                                                                                                                                                                                                                                                                                                                                                                                                                                                                                                                                                                                                                                                                                                                                              |
| <p><b>Experimental design and statistics</b></p> <p>Full details of the experimental design and statistical methods used should be given in the Methods section, as detailed in our <a href="#">Minimum Standards Reporting Checklist</a>. Information essential to interpreting the data presented should be made available in the figure legends.</p> <p>Have you included all the information requested in your manuscript?</p> | Yes                                                                                                                                                                                                                                                                                                                                                                                                                                                                                                                                                                                                                                                                                                                                                                                                                                                                                                                                                                                                                                                                                                                                                                                                                                                                                                                                                                                                                                                                                                                                                                                                                                                                                                                                                                                                                                                                                                                                                                                                                                             |
| <b>Resources</b>                                                                                                                                                                                                                                                                                                                                                                                                                   | Yes                                                                                                                                                                                                                                                                                                                                                                                                                                                                                                                                                                                                                                                                                                                                                                                                                                                                                                                                                                                                                                                                                                                                                                                                                                                                                                                                                                                                                                                                                                                                                                                                                                                                                                                                                                                                                                                                                                                                                                                                                                             |



|                                                                                                                                                                                                                                                                                                                                                                                                                                                                                                                                                         |                                                                                                                                                    |
|---------------------------------------------------------------------------------------------------------------------------------------------------------------------------------------------------------------------------------------------------------------------------------------------------------------------------------------------------------------------------------------------------------------------------------------------------------------------------------------------------------------------------------------------------------|----------------------------------------------------------------------------------------------------------------------------------------------------|
| <p>A description of all resources used, including antibodies, cell lines, animals and software tools, with enough information to allow them to be uniquely identified, should be included in the Methods section. Authors are strongly encouraged to cite <a href="#">Research Resource Identifiers</a> (RRIDs) for antibodies, model organisms and tools, where possible.</p> <p>Have you included the information requested as detailed in our <a href="#">Minimum Standards Reporting Checklist</a>?</p>                                             |                                                                                                                                                    |
| <p><b>Availability of data and materials</b></p> <p>All datasets and code on which the conclusions of the paper rely must be either included in your submission or deposited in <a href="#">publicly available repositories</a> (where available and ethically appropriate), referencing such data using a unique identifier in the references and in the “Availability of Data and Materials” section of your manuscript.</p> <p>Have you have met the above requirement as detailed in our <a href="#">Minimum Standards Reporting Checklist</a>?</p> | <p>No</p>                                                                                                                                          |
| <p>If not, please give reasons for any omissions below.</p> <p>as follow-up to "<b>Availability of data and materials</b></p> <p>All datasets and code on which the conclusions of the paper rely must be either included in your submission or deposited in <a href="#">publicly available repositories</a> (where available and ethically appropriate), referencing such data using a unique identifier in the references and in the “Availability of Data and Materials” section of your manuscript.</p>                                             | <p>All sequence data will be submitted to a publicly available repositories when this manuscript is acceptable for publication in GigaScience.</p> |

Have you have met the above requirement as detailed in our [Minimum Standards Reporting Checklist](#)?

"



[Click here to view linked References](#)

1 **Introgression of Eastern Chinese and Southern Chinese haplotypes**  
2 **contributes to the improvement of fertility and immunity in European**  
3 **modern pigs**

4  
5 Hao Chen<sup>§</sup>, Min Huang<sup>§</sup>, Bin Yang, Zhongping Wu, Zheng Deng, Yong Hou, Jun Ren<sup>\*†</sup>,  
6 Lusheng Huang<sup>\*</sup>

7  
8 State Key Laboratory of Pig Genetic Improvement and Production Technology, Jiangxi  
9 Agricultural University, Nanchang, P.R. China.

10

11

12 <sup>§</sup> Both authors contributed equally to this study and should be considered co-first authors

13

14 <sup>†</sup>Current address: College of Animal Science, South China Agricultural University, 510642,  
15 Guangzhou, P.R. China

16

17 **Correspondence author:** Jun Ren, Lusheng Huang

18 State Key Laboratory of Pig Genetic Improvement and Production Technology

19 Jiangxi Agricultural University

20 Nanchang 330045, P. R. China.

21 Phone: 0086-791-83805967; Fax: 0086-791-83900189;

22 E-mail: renjunxau@hotmail.com; lushenghuang@hotmail.com

23 **Abstract**

24 Pigs were domesticated independently from European and Asian wild boars nearly 10,000  
25 years ago. Chinese indigenous pigs have been historically introduced to improve Europe local  
26 pigs. However, the geographic origin and biological functions of introgressed Chinese genes  
27 in modern European pig breeds remain largely unknown. Here we explored whole-genome  
28 sequencing data from 266 Eurasian wild boars and domestic pigs to produce a fine-scale map  
29 of introgression between French Large White (FLW) and Chinese pigs. We show that FLW  
30 pigs had historical admixture with both Southern Chinese (SCN) and Eastern Chinese (ECN)  
31 pigs approximately 200–300 years ago. Moreover, a set of SCN haplotypes was shown to be  
32 beneficial for improving disease resistance and those with ECN haplotypes are favorable for  
33 improved reproductive performance in FLW pigs. Intriguingly, we found both human-  
34 mediated and archaic introgression events at the *AHR* locus, at which the archaic haplotype  
35 contributes to increased fertility in both ECN and FLW pigs. This study advances our  
36 understanding of the breeding history of global domestic pigs and highlights the importance of  
37 artificial hybridization and natural archaic introgression in the formation of phenotypic  
38 characteristics in domestic animals.

## 39 **Introduction**

40 Integrated genomic and archaeological evidence have illuminated the fact that the wild boar  
41 (*Sus scrofa*) originated in the Islands of Southeast Asia about 5 million years ago and then  
42 dispersed throughout Eurasia. Approximately 1 million years ago, geographic isolation caused  
43 by glacial events hampered the continuous gene flow among Eurasian wild boars, causing  
44 European and Asian wild boars to differentiate from each other [1-4]. About 10,000 years ago,  
45 European and Asian wild boars were domesticated independently in the Near East and China,  
46 respectively [3, 5, 6]. After long-term artificial selection and natural selection, abundant genetic  
47 resources of domestic pigs appeared in China, accounting for about one-third of global breeds  
48 [7, 8]. Chinese pigs are distributed in diverse geographic regions and have different breed  
49 features. For example, Erhualian (EHL) and Meishan pigs in East China are known for their  
50 prolificacy, with a litter size of more than 15, and for their thick skin. Luchuan (LUC) and  
51 Bama pigs in South China have inferior reproductive performance (8–10 piglets per parity),  
52 have thin skin and excellent heat resistance [7]. These pig breeds not only play a critical role  
53 in the Chinese pig industry, but also have contributed to the development of international  
54 commercial breeds, such as the Large White (LW) [9, 10].

55 Chinese pigs were introduced to Europe mainly during three historical periods [7]. From  
56 1685 to 1757, the Qing Dynasty set up four foreign trade ports: two in East China (Shanghai  
57 and Ningbo) and two (Zhangzhou and Guangzhou) in South China. Europe (especially England)  
58 had frequent trade with China through these four ports, mainly via the East India Company.  
59 This raises the possibility that Eastern Chinese (ECN) and Southern Chinese (SCN) pigs may  
60 have been transported to European countries during this period. From 1757 to 1841, only the  
61 Guangzhou port in South China was permitted access to foreign trade, and a ban was imposed  
62 on maritime trade or intercourse with foreign countries in 1757. It is well documented that SCN  
63 pigs had been introduced to England for the hybridization of local pigs during this period,

64 contributing to the formation of Berkshire [9] and LW pigs [10]. In 1978, the Chinese  
65 government launched the reform and open-door policy. Since then, ECN pigs, including  
66 Meishan, Jinhua, and Jiaxing Black, have been introduced into France, America, and Japan for  
67 the development of prolific synthetic lines [7].

68 Recently, whole-genome re-sequencing analysis has confirmed the human-mediated  
69 translocation of Chinese pigs into Europe that provided genetic variations for the selective  
70 breeding of modern commercial LW pigs [11]. However, it remains unknown if SCN or ECN  
71 pigs or both were introduced to Europe, because previous studies used a limited number of  
72 Chinese pigs from different locations as a whole population. French Large White (FLW) pigs  
73 are known for their excellent reproductive performance. A remarkable genetic improvement of  
74 litter size has been witnessed in FLW pigs over the past decades, but the molecular mechanisms  
75 underlying the fecundity remain unclear, although the fecundity is speculated to be related to  
76 the recent introgression of highly prolific Chinese pigs such as ECN pigs [7]. Further studies  
77 are required to test this speculation.

78 In this study, we explored whole-genome sequencing data of 266 Eurasian pigs to show that  
79 both SCN and ECN haplotypes were introgressed into LW pigs ~200–300 years ago. Some of  
80 the introgressed haplotypes have been under preferential selection to improve fertility and  
81 immunity in FLW pigs. Interestingly, the prolificacy-associated *AHR* haplotype was likely  
82 introgressed from an archaic *Sus* population into ECN pigs via interspecies hybridization and  
83 was then introduced from ECN pigs to FLW pigs through human-driven transportation. These  
84 findings advance our understanding of the breeding history and genetic mechanisms underlying  
85 breed characteristics of global domestic pigs. Moreover, this study highlights the importance  
86 of artificial intraspecies crossbreeding and natural interspecies hybridization on the phenotypic  
87 characteristics of domestic animals.

88

## 89 **Results**

### 90 **Whole-genome sequencing data**

91 We obtained whole-genome sequencing data of 266 animals from 25 populations  
92 (**supplementary table S1**), including 36 highly prolific FLW pigs from the nucleus  
93 populations of two breeding companies. The 36 pigs were selected due to their total number  
94 born (TNB) piglets of more than 19 and distant genetic relationship between each individual  
95 (**supplementary fig. S1**). High-depth re-sequencing was conducted on a Hiseq 2000 or 2500  
96 sequencer (Illumina, USA). After filtering raw data (see Methods), we called 32.7 million  
97 single nucleotide polymorphisms (SNPs) from the 266 individuals. For the 28 LW pigs whose  
98 sequence data were retrieved from the public NCBI database (see Methods), we used the  
99 Illumina Porcine SNP60 chip [12] data set to identify their origin. We demonstrated that 14  
100 individuals belonged to the American Large White (ALW) lineage, and the other 14 individuals  
101 belonged to the Dutch Large White (DLW) line (**supplementary fig. S2**).

102

### 103 **Genetic differentiation between SCN and ECN pigs**

104 Eurasian wild boars began to differentiate as early as ~1 million years ago [2, 3], and Chinese  
105 and European wild boars were independently domesticated about 10,000 years ago [1, 3]. The  
106 remarkable genetic differentiation between Chinese and Western pigs was reflected in the  
107 results from principal component analysis (PCA), phylogenetic analysis and admixture  
108 analysis (**fig. 1**). In our PCA analysis, the first principal component (PC1) accounted for 16.32%  
109 of the total eigenvalue, which clearly separated the Chinese pig from the Western pig. The  
110 second principal component (PC2) showed the differentiation among Chinese pigs, especially  
111 between SCN and ECN pigs (PC2 = 3.78%, **fig. 1a**). In a neighbor joining tree between  
112 individuals (**fig. 1b**) and populations (**fig. 1c**), Chinese and Western pigs defined two separate  
113 clades. For Chinese domestic pigs, SCN and ECN pigs formed two different branches. The

114 clustering pattern was similar to the maximum likelihood tree revealed with TreeMix analysis,  
115 in which two Sumatras wild boars, one *Sus barbatus*, one *Sus verrucosus*, one *Sus cebifrons*,  
116 one *Sus celebensis*, and one *Phacochoerus africanus* were treated as an outgroup (OUT), and  
117 the interpretation of the maximum likelihood tree reached 99.9% (**supplementary fig. S3**). In  
118 an admixture analysis, Chinese pigs and European pigs showed two distinct ancestral lineages  
119 when  $K = 2$ , although there were gene flows between the two groups, especially the North  
120 Chinese pig, that clearly mixed with European pig lineages, whereas LW (including FLW) pigs  
121 showed signatures of admixture with Chinese pigs. ECN pigs represented by Jinhua (JH) pigs  
122 and SCN pigs represented by Luchuan pigs appeared as the two ancestral lineages of Chinese  
123 pigs when  $K = 3$  (**fig. 1d**). Altogether, these findings not only confirmed the independent  
124 domestication of Chinese and European pigs, but also revealed that SCN pigs and ECN pigs  
125 have marked genetic differentiation and represent two ancient lineages of the Chinese domestic  
126 pig.

127

### 128 **SCN and ECN pigs were introgressed into Europe between 220 and 310 years ago**

129 To determine whether SCN and ECN pigs were introduced into Europe via human-mediated  
130 transportation, we performed relative identity-by-descent (rIBD) analysis using whole genome  
131 sequencing data (see Methods). We detected 5,107 and 5,024 50-kb regions with signatures of  
132 potential introgression from SCN (**supplementary table S2**) or ECN (**supplementary table**  
133 **S3**) pigs into FLW pigs, respectively (**figs. 2a and 2b, supplementary fig. S4**). The  
134 introgressed DNA from SCN and ECN pigs differed greatly in FLW pigs, with an overlap of  
135 only 6.0% introgression regions (**fig. 2c**) and 2.9% genes within these regions (**fig. 2d**). We  
136 thus performed Gene Ontology (GO) and Kyoto Encyclopedia of Genes and Genomes (KEGG)  
137 pathway enrichment analysis on the genes located in the introgressed regions. The genes within  
138 the regions of inferred introgression with SCN pigs and ECN pigs were enriched in the

139 immune-related signaling and fertility pathways, respectively (**fig. 2e**). We further used  
140 ALDER software [13] to estimate the time of admixture between FLW and SCN or ECN pigs,  
141 which yielded an estimate of  $53 \pm 9$  ( $265 \pm 45$  years) and  $54 \pm 9$  ( $270 \pm 45$  years) generations  
142 ago, respectively. This estimation was consistent with historical records stating that SCN pigs  
143 were deliberately transported to England at the onset of the first Industrial Revolution and  
144 contributed to the breeding of LW pigs [11]. In addition, these results supported our hypothesis  
145 that ECN pigs were also introduced into Europe to improve the productivity of local pigs  
146 between 1685 and 1757.

147

148 **The introgressed *GOLMI-NAA35* haplotype from SCN pigs has been under selection to**  
149 **enhance the disease resistance of FLW pigs**

150 We detected seven genomic regions with strong signatures of introgression from SCN pigs in  
151 the genomes of FLW pigs (rIBD value > 0.2; **supplementary table S4**). Two adjacent genes  
152 (3,511 bp apart), *GOLMI* and *NAA35*, were located in one of these seven regions. The *GOLMI*  
153 gene encodes a type II Golgi transmembrane protein, which is mainly synthesized in the rough  
154 endoplasmic reticulum, assists in processing proteins in the Golgi and is responsive to viral  
155 infections [14]. In 2016, Li *et al.* [15] reported that the *GOLMI-NAA35* locus markedly  
156 modulated the cytokine interleukin-6 (IL-6) production by human immune cells in response to  
157 multiple pathogens. Given the important role of the *GOLMI-NAA35* locus in disease resistance,  
158 we chose this locus for further study.

159 We first made a close examination of the rIBD results for a 2-Mb region encompassing the  
160 *GOLMI-NAA35* locus (**SSC10: 33.20 – 33.58 Mb in Sscrofa10.2 and 29.15 - 29.50 Mb in**  
161 **Sscrofa11.1**). We found that the frequency of shared IBD haplotypes between FLW and SCN  
162 pigs at the *GOLMI-NAA35* locus was significantly higher than those in the surrounding regions  
163 (**fig. 3a**). Moreover, we observed remarkably elevated genetic differentiation ( $F_{ST}$ ) between



164 FLW pigs and European wild boars, in contrast to the particularly decreased  $F_{ST}$  between FLW  
165 and SCN pigs in the *GOLMI-NAA35* region we observed (**fig. 3b**). In addition, there were four  
166 main *GOLMI-NAA35* haplotypes in FLW pigs. Most individuals (32 out of 36) carried  
167 haplotypes similar to those of SCN pig (**fig. 3c**).

168 Next, we used 3,447 SNPs in the *GOLMI-NAA35* region to construct an NJ tree  
169 (**supplementary fig. S5**). We found that most FLW pigs ( $n = 32$ ) clustered with SCN pigs to  
170 form a branch that was separated from ECN pigs and European pigs, whereas only a small  
171 number of FLW pigs ( $n = 4$ ) clustered with European pigs, which was in stark contrast to a  
172 genome-wide NJ-tree (**fig. 1a**). We further constructed a haplotype network using 298 SNPs at  
173 the *GOLMI-NAA35* locus (**fig. 3d**). We clearly identified haplotype VII as being the main  
174 haplotype in FLW pigs, and this haplotype appeared 37 times in all populations, including 23  
175 times in FLW pigs, 8 times in LW pigs, and 6 times in SCN pigs. The SCN-major haplotype  
176 VIII and haplotype VII differed at only four different sites, whereas the unique haplotypes  
177 (XIX, XXIII and X) of European wild boars and haplotype VII differed at more than 180 sites  
178 (**supplementary fig. S6**). These results corroborate the historical introgression of SCN pigs  
179 into FLW pigs and illuminate that haplotype VII at the *GOLMI-NAA35* locus in FLW pigs  
180 originated from SCN pigs.

181 We noted that the introgressed haplotype VII was present in other LW pigs at low  
182 frequencies but was absent in other European domestic pigs. This was conceivable because all  
183 LW populations originated in England where SCN pigs were introduced during the first  
184 Industrial Revolution (early 19th century) [7]. Moreover, this introgressed haplotype appeared  
185 one time in European wild boars. Considering the outdoor grazing of early European pigs, we  
186 believe that European wild boars had admixture with European domestic pigs, after which this  
187 haplotype was introgressed from European domestic pigs into European wild boars.

188 The haplotype heatmap of the *GOLMI-NAA35* region shows that the SCN-originated  
189 haplotype VII was frequently present in FLW pigs (**fig. 3c**), which suggested that this haplotype  
190 may be selected for in FLW pigs. To verify this hypothesis, we first compared the linkage  
191 disequilibrium (LD) values ( $r^2$ ) of the *GOLMI-NAA35* region and an upstream (3 Mb) region  
192 with the same size as the *GOLMI-NAA35* locus. We found that the LD level in the *GOLMI-*  
193 *NAA35* region of the FLW population ( $r_{0.3}^2 = 192.3$  kb) was significantly higher than that of all  
194 other populations (**supplementary fig. S7a**), whereas the LD value ( $r_{0.3}^2$ ) in the upstream  
195 region was only 17.3 kb, which was similar to most populations (**supplementary fig. S7b**).  
196 Subsequently, we performed LD analysis for 10,000 81.9-kb regions randomly sampled across  
197 the genomes of 36 FLW pigs (**supplementary fig. S7c**). We found that the LD value ( $r^2$ ) in  
198 the *GOLMI-NAA35* region ranked in the top 2.6% of the 10,000 bootstrap results, which was  
199 a significant outlier ( $P = 0.02$ ) and suggested that the introgressed *GOLMI-NAA35* haplotype  
200 likely underwent a preference selection in FLW pigs, resulting in a local increase of LD level  
201 in this target region. XP-EHH analysis also showed evidence of selection at the *GOLMI-*  
202 *NAA35* region in FLW pigs but not in other LW pigs (**fig. 3e**).

203 To examine whether the *GOLMI-NAA35* haplotypes were associated with serum IL-6  
204 content in FLW pigs, we collected venous blood from 54 healthy adult FLW sows at the same  
205 physiological stage and determined the IL-6 levels in the serum of each individual using an  
206 enzyme-linked immunoassay (ELISA) (**supplementary table S5**). Meanwhile, we defined the  
207 *GOLMI-NAA35* haplotypes for each individual using two tag SNPs and then tested the  
208 association between these haplotypes and IL-6 content. We found that individuals  
209 homozygously carrying the introgressed haplotype (*QQ*) had significantly higher IL-6  
210 concentrations than heterozygotes individuals (*Qq*) ( $P = 0.015$ , **fig. 3f**). Altogether, a sensible  
211 explanation for the introgression at the *GOLMI-NAA35* locus is that the *GOLMI-NAA35*  
212 haplotype was historically introgressed from SCN pigs into LW pigs and then has been under

213 preferential selection to improve the effective production of IL-6 in response to pathogens and  
214 consequently enhance the resistance to infectious disease of FLW pigs.

215 Historically, South China was renowned as a land of plague with a humid and stuffy  
216 environment. It was notorious for local infectious diseases, including malignant malaria that  
217 caused high transmission and mortality rates before the Southern Song Dynasty (1127–1279  
218 AD). This hostile environment imposed severe physiological challenges on the inhabitants in  
219 South China [7]. Native inhabitants like humans and pigs are believed to have evolved the  
220 adaptive mechanisms to address this harsh environment, likely via selection of immune-related  
221 genes during the long history of colonization of this area. It is thus conceivable that those genes,  
222 including *GOLMI-NAA35* within the introgression regions from SCN pigs, are enriched in  
223 immune-related signaling pathway genes. Interestingly, a recent genomic analysis unraveled a  
224 list of genes related to immune response under selection in southern Han Chinese, including  
225 *G6DP* associated with resistance to malaria [16].

226

227 **The introgressed *KATNAL1* haplotype from ECN pigs has been preferentially selected to**  
228 **increase the fertility of FLW boars**

229 In FLW pigs, a 200 kb region on chromosome 11 (6.68 - 6.88 Mb in *Sscrofa10.2* and 6.92 -  
230 7.12 Mb in *Sscrofa11.1*) showed the strongest (the highest rIBD value) signal of admixture  
231 with ECN pigs, and it contained only one gene, *KATNAL1*. *KATNAL1* regulates microtubule  
232 dynamics in testicular support cells, affecting the separation and binding of microtubules.  
233 Promoting the rapid reorganization of testicular support cell microtubule arrays is an essential  
234 process for spermatogenesis and male fertility [17]. Thus, *KATNAL1* plays an important role  
235 in spermatogenesis. Given the top introgression signal at the *KATNAL1* locus and the role of  
236 *KATNAL1* in boar fertility, we conducted an in-depth analysis focusing on the *KATNAL1* region  
237 using the same method as used for the *GOLMI-NAA35* locus.

238 We found that the frequency of the shared IBD haplotype between FLW and ECN pigs in  
239 the *KATNAL1* region was particularly higher than that in the surrounding segments (**fig. 4a**).  
240 There was a remarkable local increase of  $F_{ST}$  between FLW pigs and European wild boars and  
241 a significant decrease of  $F_{ST}$  between FLW pigs and ECN pigs in the *KATNAL1* region (**fig.**  
242 **4b**). FLW pigs had four main haplotypes in this region. Most individuals (30 out of 36) carried  
243 haplotypes highly similar to the ECN haplotypes, and the others were similar to European wild  
244 boars and European domestic pigs (**fig. 4c**). Additionally, 30 FLW pigs and ECN pigs were  
245 clustered into one large clade while only six FLW pigs were grouped with European pigs in an  
246 NJ tree that was constructed with 529 SNPs in the *KATNAL1* gene (**supplementary fig. S8**).  
247 Meanwhile, we constructed a haplotype network using these 529 SNPs (**fig. 4d**) and analyzed  
248 the nucleotide differences among different haplotypes (**supplementary fig. S9**). The most  
249 frequent haplotype (XXVII) appeared 57 times in the 266 tested individuals, including 35 FLW  
250 pigs, 18 ECN pigs, 2 ALW pigs and 2 SCN pigs. This haplotype and its closest ECN haplotype  
251 (XXV, at five different sites, **supplementary fig. S9**) were divergent from the European pig  
252 haplotype groups (**fig. 4d**). These results further demonstrated that the *KATNAL1* haplotypes  
253 were introgressed from ECN pigs into FLW pigs.

254 We performed LD bootstrap sampling and XP-EHH analysis to detect evidence of selection  
255 at the *KATNAL1* locus in FLW pigs. First, we compared the LD value ( $r^2$ ) of the *KATNAL1*  
256 region and those of 10,000 randomly selected genomic regions with the same size as the  
257 *KATNAL1* gene (43.4 kb). We found that the LD level in the *KATNAL1* region ( $r_{0.3}^2 = 437.5$  kb)  
258 was a significant ( $P = 0.02$ ) outlier, ranking in the top 2.5% of 10,000 bootstrap results  
259 (**supplementary fig. S10**). We also detected a significant selection signal at the *KATNAL1*  
260 locus in FLW pigs but not in other LW pigs using XP-EHH (**fig. 4e**). These results suggest that  
261 the introgressed *KATNAL1* haplotype from ECN pigs was preferentially selected for in FLW  
262 pigs.

263 Given the important role of *KATNAL1* in male fertility, the fecundity of ECN pigs and  
264 historical selection for fecundity in FLW pigs, we speculated that the introgressed *KATNAL1*  
265 haplotype could contribute to the improvement of male reproductive performance and thus  
266 underwent selection in FLW pigs since introgression. To test this hypothesis, we analyzed the  
267 association between the *KATNAL1* haplotypes and FLW boar fertility that was represented by  
268 the average estimated breeding value (EBV) for TNB of mating sows. We detected a significant  
269 difference in boar fertility between 17 homozygous carriers of the introgressed haplotype (*QQ*)  
270 and 14 carriers of non-ECN pig haplotypes (*qq*) ( $P = 0.036$ ; **fig. 4f**). The EBV for TNB (EBV-  
271 TNB) of *QQ* individuals was 0.018, with a difference of 0.32 (which equates to an increase of  
272 0.32 piglets born per parity) compared with *qq* individuals. As TNB is a complex multi-locus  
273 trait, an increase of 0.32 piglets born is substantial for current pig breeding programs. This  
274 indicated that the introgressed *KATNAL1* haplotype has been favored and intensively selected  
275 by breeders, contributing to the formation of excellent reproductive traits in FLW pigs.

276

#### 277 ***AHR* haplotypes that associate with increased litter size were likely introgressed from** 278 **ECN pigs into LW pigs**

279 In 2014, Bosse *et al.* [11] found that Chinese haplotypes in a 6.8-Mb region on chromosome 9  
280 containing the *AHR* gene were introgressed into European pigs and were preferentially selected  
281 to increase fertility during the development of LW pigs. We also conducted a shared haplotype  
282 test (rIBD) between 121 Chinese pigs and 64 LW pigs in this 6.8-Mb region. We confirmed  
283 the presence of Chinese-derived haplotypes in European pigs including FLW pigs, with a  
284 **strong** introgression signal at the *AHR* locus (**SSC9: 92.25–97.45 Mb in Sscrofa10.2 and 83.90–**  
285 **88.40 Mb in Sscrofa11.1**) (**supplementary fig. S11**). To explore the geographic origin of the  
286 introgressed Chinese *AHR* haplotypes, we first constructed a phylogenetic tree of all sequenced  
287 individuals around the *AHR* region, and surprisingly found that most of domestic pigs were

288 clustered together with small genetic distance but were divergent from European and Asian  
289 wild boars (**supplementary fig. S12a**). We further reconstructed and visualized haplotypes  
290 around the *AHR* gene (95.5–95.65 Mb in *Sscrofa10.2* and 86.47–86.65 Mb in *Sscrofa11.1*) and  
291 found that most haplotypes of LW pigs were highly similar to those of Chinese EHL pigs and  
292 Tibetan pigs (**fig. 5a**). In an NJ-tree of this region, 15 FLW pigs gathered with EHL pigs and  
293 Tibetan pigs, defining a branch distinct from other Chinese breeds (**supplementary fig. S12b**).  
294 In addition, FLW pigs and EHL pigs had the smallest  $F_{ST}$  values with the exception of other  
295 LW pigs (**supplementary fig. S12c**). Given the geographic distance between Tibet and Europe  
296 and the lack of any historical records describing the importation of Tibetan pigs into Europe,  
297 we argue that Chinese derived *AHR* haplotypes in FLW pigs were most likely introgressed  
298 from ECN pigs such as EHL pigs.

299

### 300 **The *AHR* haplotype was introgressed into Chinese pigs via ancient interspecies** 301 **hybridization**

302 We noticed that the *AHR* haplotypes of most Chinese pigs were highly similar, but were distinct  
303 from those of Asian and European wild boars (**figs. 5a**). Moreover, a large proportion of  
304 Chinese domestic pigs, such as EHL pigs, had a smaller nucleotide distance from the OUT  
305 population than from Asian wild boars in the *AHR* region (**supplementary fig. S13**). This was  
306 unexpected, as we know that these domestic pigs originated from wild boars. One possible  
307 explanation was that the *AHR* haplotypes of many Chinese domestic pigs were not derived  
308 from Chinese wild boars but from another potentially extinct *Sus* species. To test this  
309 hypothesis, we constructed a haplotype network using 133 SNPs in the *AHR* gene (see  
310 Methods). Interestingly, we observed three distinct haplotype groups, one including the  
311 haplotype of Asian wild boars and Chinese domestic pigs, one comprised of European wild  
312 boars and European domestic pigs, and another was defined by haplotypes of Eurasian

313 domestic pigs and OUT individuals (**fig. 5b**). In addition, the most frequent haplotype (XVI)  
314 appeared 100 times in all 266 sequenced individuals, including 30 FLW pigs, 24 other LW  
315 pigs, 18 EHL pigs and 26 Tibetan pigs. This haplotype had a close phylogenetic relationship  
316 with the OUT haplotype XII but was divergent from the major haplotypes (II and VII) of  
317 Eurasian wild boars (**fig. 5b**), a pattern expected under introgression. Note that the nucleotide  
318 differences between the haplotype XVI and the OUT haplotype XII were only 7, in contrast to  
319 the 100 or so between haplotypes XVI and II and 93 between haplotypes XVI and VII (**fig. 5c**).  
320 These findings corroborated our assumption that haplotype XVI was introgressed from a  
321 divergent archaic *Sus* population into the ancestors of Chinese domestic pigs via naturally  
322 occurring interspecies hybridization, then introduced from ECN pigs into European domestic  
323 pigs through human-mediated transportation about 200–300 years ago, and thus, rarely existed  
324 in Eurasian wild boars.

325 To provide further evidence for a possible interspecies hybridization at the *AHR* locus, we  
326 selected 38 individuals from OUT, Asian wild boars (AWB), and ECN pigs (EHL as an  
327 example) to perform allele frequency difference analysis, and calculated the ratio of OUT SNPs  
328 in EHL pigs per window with a sliding window of 50 kb across the entire genome (see  
329 Methods). Of note, a total of 63 SNPs in a 50-kb window containing the *AHR* gene were  
330 potential archaic SNPs derived from the OUT population, accounting for 66% of the total SNPs  
331 in this window. This ratio was the largest one in all 45,429 windows genome-wide (**fig. 5d**).  
332 Furthermore, we used an improved ABBA-BABA method ( $f_D$ ) for gene flow analysis (see  
333 Methods). Interestingly, we detected an extreme outlier signal that the window containing the  
334 *AHR* gene had an  $f_D$  value greater than 0.8 corroborated by a significant outlier of the  
335 nucleotide distance ( $D_{xy}$ ) between EHL pigs and AWB (**fig. 5e**). In addition, the nucleotide  
336 distance of EHL pigs versus AWB and FLW pigs versus European wild boars reached 2.05  
337 and 2.64, respectively. In contrast, the nucleotide distance of EHL pigs versus OUT animals



338 and FLW pigs versus OUT animals were only 1.51 and 1.41, respectively (**supplementary fig.**  
339 **S13**). Altogether, our data strongly support archaic introgression at the *AHR* locus.

340 We noted that the introgressed haplotype XVI was desirable for increasing the EBV-TNB  
341 of both FLW pigs (**fig. 5f**) and EHL pigs (**fig. 5g**). By genotyping the haplotype tag SNPs and  
342 one-way analysis of variance (see Methods), we found that homozygous carriers of the archaic  
343 *AHR* haplotype (XVI) had 0.24 higher EBV-TNB than heterozygous carriers ( $P = 0.001$ ,  
344 **supplementary table S6**) in EHL pigs. Moreover, the introgressed archaic *AHR* haplotype was  
345 significantly associated with increased EBV-TNB in FLW sows, with an additive effect value  
346 of 0.25 ( $P = 2.39 \times 10^{-5}$ ; **fig. 5f, supplementary table S7**), which was in agreement with the  
347 report of Bosse *et al.*[11]. Similar to the *KATNAL1* and *GOLM1-NAA35* regions, the LD value  
348 of FLW pigs at the *AHR* gene region ranked in the top 7% (significant outlier) of all 10,000  
349 bootstrap values ( $P = 0.03$ , **supplementary fig. S14**). We also detected a significant iHS  
350 selection signal within the FLW pig population (**supplementary fig. S15**). These findings  
351 enabled us to conclude that the archaic *AHR* haplotype had been under a preferential selection  
352 to improve the fertility of FLW pigs.

353

## 354 **Discussion**

### 355 **Introgression of both SCN and ECN pig DNA contributed to the genetic improvement of** 356 **European modern pig breeds**

357 European and Asian domestic pigs were independently domesticated from European and Asian  
358 wild boars, respectively, nearly 10,000 years ago [3, 5, 6]. In this study, population genetics  
359 analyses confirmed striking genetic differences between Chinese and European domestic pigs  
360 and uncovered obvious genetic differentiation between SCN and ECN pigs, which represent  
361 two ancestral lineages of Chinese pigs. Of note, we identified Chinese haplotypes in FLW pigs,  
362 which were introgressed from both SCN and ECN pigs. We inferred that the introgression

363 events occurred 220–310 years ago, which was in accordance with historical records that SCN  
364 pigs were transported to England through the Guangzhou port during the first Industrial  
365 Revolution [7]. Our results also supported the speculation that ECN pigs were introduced into  
366 Europe, likely through the Shanghai and Ningbo ports, in the decades before the Qing Dynasty  
367 imposed a ban on the sea in 1757. Thus, we believe that both SCN and ECN pigs were  
368 introduced to Europe to improve the production performance of local breeds, contributing to  
369 the development of modern European commercial pig breeds. Taking the *GOLMI-NAA35* and  
370 *KATNALI* loci as examples, the introgressed *GOLMI-NAA35* haplotype from SCN pigs was  
371 beneficial for improving disease resistance in FLW pigs, and the introgressed *KATNALI*  
372 haplotype from ECN pigs was favorable for boar fertility and provided genetic variations for  
373 the development of high-fecundity FLW pigs. These findings not only advance our  
374 understanding of the breeding history of modern European commercial pig breeds but also  
375 provides insights into the genetic mechanisms underlying economically important traits in pigs.

376

377 **Both naturally occurring interspecies hybridization and human-driven crossbreeding**  
378 **played important roles in the development of global pig breeds**

379 In recent years, emerging reports have shown that interspecies hybridization played an  
380 important role in adaptive evolution of mammals. For example, the Denisova-like *EPAS1*  
381 haplotype help Tibetans to adapt to the high-altitude hypoxia environments [18]. Admixture  
382 with the yak enabled Tibetan cattle to quickly obtain favorable *EGPNI* alleles for high-altitude  
383 adaptation [19]. We reported previously on an archaic adaptive introgression on the X  
384 chromosome that contributed to the adaptation of North Chinese pigs to high-latitude cold  
385 environments [20]. Here, we show that the *AHR* haplotype associated with increased sow litter  
386 size was derived from an archaic population. It was first introgressed into Chinese pigs via  
387 interspecies hybridization. Then it was introduced from ECN pigs into European pigs, such as

388 the Large White breed, through human-mediated transportation and hybridization some 200–  
389 300 years ago. It has further experienced preferential selection, presumably during the past  
390 decades, and is present at high frequency in FLW pigs, contributing to the improvement of the  
391 reproductive performance of this breed. Thus, this study provides another example of the  
392 archaic adaptive introgression of domestic animals. It also shows that both naturally occurring  
393 interspecies hybridization and human-driven crossbreeding play important roles in the  
394 development of global pig breeds, illustrating a complex breeding history of domestic pigs.

395

## 396 **Materials and Methods**

### 397 **Samples**

398 All procedures used for this study and involving animals were in compliance with guidelines  
399 for the care and utility of experimental animals established by the Ministry of Agriculture of  
400 China. The ethics committee of Jiangxi Agricultural University approved this study. This study  
401 utilized genome-wide re-sequencing data from 266 animals (**supplementary table S1**), of  
402 which 153 pigs were re-sequenced for this study and 113 genome sequence datasets were  
403 downloaded from public databases (Registration Nos. ERP001813 [21], PRJEB9922 [22], and  
404 SRP047260 [23]). Among the 153 pigs, 36 were FLW sows and were collected from the  
405 Guangdong WENS Food Company (24 individuals) and Jiangxi Lvhuan Animal Husbandry  
406 Company (12 individuals). The 36 FLW sows were selected according to the following criteria.  
407 First, we calculated the relationship coefficients of all individuals in the nucleus populations  
408 of the two companies using DMU software [24] and pedigree records. Then we selected sows  
409 with a small relationship coefficient and excellent litter sizes (TNB more than 16). Finally, we  
410 chose 36 prolific individuals with distant kinship according to a phylogenetic relationship  
411 network constructed by Cytoscape v3.2.1 [25] (**supplementary fig. S1**). In total, there were 27  
412 wild boars from China and Europe, 7 outgroup individuals, 121 pigs from Chinese indigenous

413 breeds, and 111 pigs from European commercial breeds. According to the geographic  
414 distribution, Chinese domestic pigs were divided into ECN (37) pigs, SCN (20) pigs, SWCN  
415 (36) pigs, and NCN (28) pigs (see **supplementary table S1** for details). In addition, whole-  
416 genome sequence data of 28 LW pigs was downloaded from public databases, with 14  
417 individuals submitted by Seoul National University [23] and another 14 individuals submitted  
418 by Wageningen University [21]. To identify the source of these 28 LW pigs, we downloaded  
419 the Illumina 60K chip SNP data set of 76 LW pigs [26], including 20 Dutch Large White pigs  
420 (NLW), 16 Danish Large White pigs (DLW), 20 Chinese Large White pigs (CLW), and 20  
421 American Large White pigs (ALW). Next, we retrieved the same 60K chip SNPs from the  
422 whole-genome sequence data sets of the 28 LW pigs. We filtered out SNPs with an MAF less  
423 than 0.05, a call rate less than 90%, and an LD ( $r^2$ ) value more than 0.3 using PLINK v1.9 [27],  
424 and we performed PCA and NJ-tree analyses using the remaining SNPs to identify the origin  
425 of the 28 LW pigs (**supplementary fig. S2**).

426

#### 427 **Whole-genome sequencing and SNP calling**

428 We extracted genomic DNA from the ear tissues of 153 pigs using a routine phenol/chloroform  
429 protocol, and eligible samples were delivered to the Novogene company (Beijing, China).  
430 Sequencing was performed on Hiseq 2000 or 2500 instruments (Illumina, La Jolla, CA USA).  
431 The sequencing libraries were constructed with 125 bp paired ends (PE125), a 500 bp average  
432 insert fragment size, and a fragment size less than 800 bp. The genome sequencing coverage  
433 of each individual was at least 20×, with a minimum data of 60 G.

434 **Quality control:** We obtained the raw sequencing data from Hiseq sequencing platform  
435 using raw image data. We obtained clean data for performing downstream analysis after  
436 performing the following steps: (1) removal of the linker sequence, (2) retention of reads with  
437 Q20 of more than 90% (the probability of base recognition correct rate higher than 99%) and

438 Q30 of more than 85% (the probability of base recognition correct rate higher than 99.9%)[28],  
439 (3) culling of short repeat DNA segments, and (4) filtering reads with three consecutive "N".

440 **Mutation detection:** We established a reference genome index of *Sscrofa* 10.2 [6] using the  
441 index function in BWA v0.7.12 [29]. We blasted paired-end reads against the index using an  
442 algorithm from BWA and obtained binary bam files from sam files by SAMtools v1.4 [30].  
443 We used samblaster v0.1.22 [31] to reject redundancy information and calculated the alignment  
444 rate between re-sequencing data and the reference genome, as well as coverage and sequencing  
445 depth. We sorted binary bam files via GATK v3.7 [32]. We used the HaplotypeCaller function  
446 for mutation detection across each chromosome of each individual and obtained a SNP data set  
447 of the 266 individuals by deleting InDel information. We filtered out SNPs with an MAF less  
448 than 0.01 and a call rate less than 90% using PLINK v1.9 [27]. We used the remaining 32.7  
449 million SNPs in the data set for subsequent statistical analysis.

450

#### 451 **Population genetic analysis**

452 First, we generated a SNP data set with an MAF more than 0.05 and a call rate more than 90%  
453 from autosomal SNPs from 259 pigs (*Sus scrofa*) excluding seven OUT individuals. Second,  
454 we pruned SNPs with an LD ( $r^2$ ) decay of more than 0.3 in each window with 50 SNPs using  
455 the command indep-pairwise (50 10 0.3) in PLINK v1.9 [27]. Then four principal components  
456 of each individuals were estimated using --pca command in GCTA software [33]. The average  
457 shared allele (1-Dst) distance matrix between individuals was constructed using the command  
458 --distance-matrix in PLINK v1.9. A rootless NJ tree was constructed via phylip v3.69 [34] and  
459 was visualized with FigTree v1.42. We also explored the unbiased estimation method proposed  
460 by Weir and Cockerham to calculate the genetic differentiation ( $F_{ST}$ [35]) matrix between 14  
461 Chinese pig breeds and 6 European pig breeds using the --fst command in PLINK v1.9 ([27].  
462 Then, we constructed an interbreed NJ tree using phylip v3.69 [34]. ADMIXTURE [36] was

463 used to estimate the ancestral lineage composition under default parameters. First, we removed  
464 the OUT group and populations with fewer than five individuals. Then we randomly selected  
465 six individuals from the remaining 21 populations and filtered out SNPs with an MAF of less  
466 than 0.05, an LD ( $r^2$ ) of more than 0.3, and call rates less than 90%. Finally, we used a data set  
467 with 125 individuals and 658,601 SNPs to analyze the ancestral lineage composition patterns.  
468 In addition, we utilized TreeMix v1.12 [37] to infer the genetic differentiation among  
469 populations. We set OUT as the outgroup population, excluding populations with fewer than  
470 six samples and SNPs with an MAF less than 0.05 and a call rate less than 90%. We used the  
471 data set with 19,282,590 SNPs to estimate genetic differentiation among 21 populations under  
472 no migration events via TreeMix v1.12 [37].

473

#### 474 **Introgression analysis**

475 We detected the introgression signals between Chinese pigs (ECN and SCN pigs) and FLW  
476 pigs **using an IBD sharing approach** [11]. First, we used a data set with 266 individuals and  
477 approximately 20 million SNPs to phase haplotypes using the fastPhase function [38] in Beagle  
478 v4.0 and to detect IBD fragments in each individual using the fastIBD function [39]. Then we  
479 divided the whole genome into numbers of 50 kb windows (25 kb sliding) and calculated the  
480 shared IBD haplotype numbers between two populations (FLW vs. European wild boars  
481 (EWB), FLW vs. ECN, and FLW vs. SCN) in each window. We phased the haplotypes and  
482 detected the IBD regions independently 10 times and then normalized the IBD values (nIBD).  
483 The nIBD values ranged from 0 (no shared IBD detected) to 1 (all individuals shared the IBD  
484 haplotype). Finally, we used the rIBD (relative frequency of IBD) statistic to measure the  
485 shared IBD between FLW pigs and SCN or ECN pigs, respectively ( $rIBD_{FLW-SCN} = nIBD_{FLW-SCN} - nIBD_{FLW-EWB}$ ,  
486  $rIBD_{FLW-ECN} = nIBD_{FLW-ECN} - nIBD_{FLW-EWB}$ ), where a positive rIBD  
487 indicated potential introgression and 5% empirical distribution in the far right tail were set as

488 the significance threshold. For genomic regions showing strong rIBD introgression signals in  
489 FLW pigs, we further estimated  $F_{ST}$  between FLW pigs and European wild boars, as well FLW  
490 pigs and Chinese pigs (SCN pigs or ECN pigs), respectively. We also constructed haplotype  
491 networks using SNPs with a MAF of greater than 0.05 and call rates of greater than 90% at the  
492 *GOLMI-NAA3* (298 SNPs), *KATNAL1* (529 SNPs) and *AHR* (68 SNPs) loci. We explored the  
493 fastPhase function with 1000 iterations in Beagle v4.0 [39] to phase haplotypes and used the  
494 “haploNet” command in the R package “pegas” [40] to calculate the pairwise differences  
495 between haplotypes. We selected SNPs with an MAF of greater than 0.05, a call rate of greater  
496 than 90% and an LD ( $r^2$ ) < 0.3 using PLINK v1.9 [27], and then explored the selected SNPs to  
497 estimate the admixture time between populations via ALDER v1.0.3 under default parameters  
498 [13]. In short, we used the “convert” function in EIGENSTRAT [41] to convert the data format.  
499 We set FLW as a mixed population, EWB and SCN as one reference population, EWB and  
500 ECN as another reference population, and five years as one generation.

501

## 502 **Signature of selection**

503 We used the data set that excluded SNPs with an MAF of less than 0.05 and a call rate less  
504 than 90% in the whole-genome SNPs data set of 36 FLW pigs to calculate the correlation  
505 coefficient ( $r^2$ ) of each SNP pair in a target region using the commands --r2 inter-chr --ld-  
506 window-r2 0 in PLINK v1.9 [40], and we used the average  $r^2$  as the LD value in the region.  
507 Meanwhile, we randomly selected 10,000 regions with the same size as the target region across  
508 the genome, and we calculated the average  $r^2$  of each region in the 36 FLW pigs. Finally, we  
509 visualized the density curve of the 10,000 bootstrap values using R. Furthermore, we used  
510 commands --ihs [42] and --xpehh [43] under default parameters in selscan [44] software to  
511 detect the signatures of selection in 50 kb windows with a step size of 25 kb in FLW pigs.

512



### 513 **Archaic introgression test**

514 We used an improved  $f_D$  method [45] via the ABBA-BABA statistic to detect potential  
515 archaic introgression in the *AHR* region between the OUT population and EHL pigs. The  
516 calculation formulas are as follows:

$$517 \quad C_{ABBA}(i) = (1 - p_{i1})p_{i2}p_{i3}(1 - p_{i4}),$$

$$518 \quad C_{BABA}(i) = (1 - p_{i1})p_{i2}(1 - p_{i3})p_{i4},$$

$$519 \quad S(p_1, p_2, p_3, O) = \sum[C_{ABBA}(i) - C_{BABA}(i)],$$

$$520 \quad f_D = \frac{S(p_1, p_2, p_3, O)}{S(p_1, p_D, p_D, O)},$$

521 where  $p_{ij}$  indicates the  $i$ th frequency of the derived allele in the  $j$ th population, S represents  
522 the sum of the difference between ABBA and BABA, and  $p_D$  means populations with higher  
523 frequency of the derived allele (P2 or P3). According to the NJ tree, Asian wild boars, EHL,  
524 and five OUT individuals (two Sumatras, one *Sus barbatus*, one *Sus verrucosus*, and one *Sus*  
525 *cebifrons*), and one OUT individual (*Phacochoerus africanus*) were set as P1, P2, P3, and O,  
526 respectively.

527 Nucleotide differences within ( $D_x$ ) and among ( $D_{xy}$ ) populations were calculated using  
528 follow formulas [20]:

$$529 \quad D_x = \frac{2}{n_x(n_x-1)l} \sum_{i=1}^{n_x-1} \sum_{j=i+1}^{n_x-1} k_{ij},$$

$$530 \quad D_{xy} = \frac{2}{n_x n_y l} \sum_{i=1}^{n_x} \sum_{j=1}^{n_y} k_{ij},$$

531 where  $k_{ij}$  indicates the difference number of haplotype alleles between the  $i$ th allele the  $j$ th  
532 allele in a target region,  $n_x$  and  $n_y$  represent the number of haplotypes in population  $x$  and  
533  $y$ , and  $l$  indicates the number of bases that are valid in the target area (the number of bases other  
534 than N in the reference sequence). In addition, 38 individuals were selected from the OUT  
535 group (7), Asian wild boar (10), and Erhualian populations (21) and we pruned SNPs with an  
536 MAF of less than 0.05 and a call rate of less than 90%, leaving 14,333,796 SNPs. We used 50

537 kb windows with a sliding filter size of 25 kb with less than 10 SNPs to calculate the allele  
538 ratio ( $r_D = n_i/n_o$ ) in each window, where  $n_o$  indicated the number of SNPs with an allele  
539 frequency of more than 0.7 in each window in the OUT group, and  $n_i$  represents the number  
540 of SNPs with an allele frequency more than 0.6 in EHL pigs as well less than 0.15 in Chinese  
541 wild boars. The  $r_D$  of the *AHR* region is shown using a probability density curve.

542

### 543 **Haplotype association analysis**

544 **The *GOLMI-NAA35* locus:** We detected the serum IL-6 levels in 54 mature FLW sows at an  
545 age of 2–2.5 years from the same farm using the Porcine IL-6 ELISA Kit (Shanghai Keshun  
546 Biological Technology, China). The concentration of each individual was determined from the  
547 averaged repeat of three trials per individual. Meanwhile, we selected two tag SNPs to  
548 distinguish the introgressed haplotypes (VII and VIII) from the other haplotype in the *GOLMI-*  
549 *NAA35* region in FLW pigs (**fig. 3e**). The tag SNPs were genotyped by Sanger sequencing PCR  
550 products amplified with specific primers (**supplementary table S5**). A Student's *t*-test was  
551 used to detect the association between haplotypes and the serum IL-6 concentrations (log<sub>2</sub> (IL-  
552 6 values)).

553 **The *KATNAL1* locus:** We collected 765 FLW sows and 31 FLW boars from the Jiangxi  
554 Lvhuan Farming Group. First, we filtered parities with litter size less than five piglets. Then  
555 we set estrus, year, season, parity and pregnancy duration as fixed effects, and mating boars  
556 and random sow effects as random effects. We then estimated the EBV for TNB of 765 FLW  
557 pigs via DMU software [24] and pedigree information. Next, we genotyped eight tagged SNPs  
558 to distinguish each *KATNAL1* haplotype in the 31 FLW boars by PCR amplification and Sanger  
559 sequencing with primers listed in **supplementary table S8**. We denoted the introgressed  
560 XXVII haplotype from ECN pigs as Q (**fig. 4e**) and the other haplotypes as q (**supplementary**

561 **table S9**). Finally, we used Student's *t*-test to test the association between *KATNAL1*  
562 haplotypes and the average EBV-TNB of mating sows of the 31 FLW boars.

563 **The *AHR* locus:** We genotyped two tagged SNPs representing the *AHR* haplotypes for  
564 344 FLW sows by PCR amplification and Sanger sequencing with primers listed in  
565 **supplementary table S6**. We identified 230 *QQ* sows homozygous for the introgressed  
566 haplotype, 36 *Qq* sows and 78 *qq* sows who were missing the introgressed haplotypes  
567 (**supplementary table S6**). Then we tested the association between the *AHR* haplotypes and  
568 the EBV-TNB of the 344 sows using single-factor analysis of variance. Furthermore, we  
569 collected 221 Erhualian sows with multiparity records from Jiangsu Province and calculated  
570 the EBV-TNB of these sows using DMU software and pedigree information as mentioned  
571 above. We genotyped a tag SNP in the *AHR* region by Sanger sequencing PCR products with  
572 specific primers (**supplementary table S7**). We detected 176 *QQ* sows homozygous for the  
573 introgressed haplotype and 45 heterozygous (*Qq*) sows. We used a Student's *t*-test to examine  
574 the association between *AHR* haplotypes and EBV-TNB in Erhualian sows.

575

## 576 **Acknowledgements**

577 This study is supported by the Natural Science Foundation of China (31525023) and the  
578 National Key Research Project of China (2016ZX08006-5).

579

## 580 **Author Contributions**

581 J.R. and L.H. designed the study and analyzed the data. J.R., H.C. and L.H. wrote the paper.  
582 H.C., M.H., and B.Y. performed the bioinformatic analyses. H.C., M.H., Z.D. Z.W. and Y.H.  
583 collected data and performed sequencing and genotyping experiments. **We thank LetPub**  
584 (**[www.letpub.com](http://www.letpub.com)**) for its linguistic assistance during the preparation of this manuscript.

585

586 **Competing financial interests**

587 The authors declare no competing financial interests

588

589 **References**

- 590 1. Giuffra E, Kijas JM, Amarger V, Carlborg O, Jeon JT and Andersson L. The origin of  
591 the domestic pig: independent domestication and subsequent introgression. *Genetics*.  
592 2000;154 4:1785-91.
- 593 2. Kijas JM and Andersson L. A phylogenetic study of the origin of the domestic pig  
594 estimated from the near-complete mtDNA genome. *Journal of Molecular Evolution*.  
595 2001;52 3:302-8.
- 596 3. Larson G, Dobney K, Albarella U, Fang M, Matisoosmith E, Robins J, et al. Worldwide  
597 phylogeography of wild boar reveals multiple centers of pig domestication. *Science*.  
598 2005;307 5715:1618-21.
- 599 4. Frantz LA, Schraiber JG, Madsen O, Megens HJ, Bosse M, Paudel Y, et al. Genome  
600 sequencing reveals fine scale diversification and reticulation history during speciation  
601 in *Sus*. *Genome Biol*. 2013;14 9:R107. doi:10.1186/gb-2013-14-9-r107.
- 602 5. Frantz L, Meijaard E, Gongora J, Haile J, Groenen MAM and Larson G. The evolution  
603 of Suidae. *Annual Review of Animal Biosciences*. 2016;4 1:61.
- 604 6. Groenen MA, Archibald AL, Uenishi H, Tuggle CK, Takeuchi Y, Rothschild MF, et  
605 al. Analyses of pig genomes provide insight into porcine demography and evolution.  
606 *Nature*. 2012;491 7424:393.
- 607 7. Wang L, Chan YF, Russell P, Mauceli E, Johnson J, Swofford R, et al. *Animal Genetic  
608 Resources in China: pigs* (ed. China National Commission of Animal Genetic  
609 Resources). China Agriculture Press; 2011.
- 610 8. Rischkowsky B and Pilling D. *The State of the World's Animal Genetic Resources for  
611 Food and Agriculture* (Food and Agriculture Organization (FAO)). 2007.
- 612 9. Briggs HM and Briggs DM. *Modern Breeds of Livestock*. 4th ed. Macmillan Publishing  
613 Co.,Inc.; 1980.
- 614 10. Zhang W. Introduction to Large White pigs. *SWINE PRODUCTION*. 2011; 1:61-4.
- 615 11. Bosse M, Megens HJ, Frantz LA, Madsen O, Larson G, Paudel Y, et al. Genomic  
616 analysis reveals selection for Asian genes in European pigs following human-mediated  
617 introgression. *Nat Commun*. 2014;5:4392. doi:10.1038/ncomms5392.
- 618 12. Ramos AM, Crooijmans RP, Affara NA, Amaral AJ, Archibald AL, Beever JE, et al.  
619 Design of a high density SNP genotyping assay in the pig using SNPs identified and  
620 characterized by next generation sequencing technology. *PLoS One*. 2009;4 8:e6524.  
621 doi:10.1371/journal.pone.0006524.

- 622 13. Loh PR, Lipson M, Patterson N, Moorjani P, Pickrell JK, Reich D, et al. Inferring  
623 admixture histories of human populations using linkage disequilibrium. *Genetics*.  
624 2013;193 4:1233.
- 625 14. Kladney RD, Bulla GA, Guo L, Mason AL, Tollefson AE, Simon DJ, et al. GP73, a  
626 novel Golgi-localized protein upregulated by viral infection. *Gene*. 2000;249 1–2:53-  
627 65.
- 628 15. Li Y, Oosting M, Deelen P, Ricañoponce I, Smeekens S, Jaeger M, et al. Inter-  
629 individual variability and genetic influences on cytokine responses to bacteria and fungi.  
630 *Nature Medicine*. 2016;22 10:1192.
- 631 16. Liu S, Huang S, Chen F, Zhao L, Yuan Y, Francis SS, et al. Genomic Analyses from  
632 Non-invasive Prenatal Testing Reveal Genetic Associations, Patterns of Viral  
633 Infections, and Chinese Population History. *Cell*. 2018;175 2:347-59 e14.  
634 doi:10.1016/j.cell.2018.08.016.
- 635 17. Smith LB, Milne L, Nelson N, Eddie S, Brown P, Atanassova N, et al. KATNAL1  
636 Regulation of Sertoli Cell Microtubule Dynamics Is Essential for Spermiogenesis and  
637 Male Fertility. *Plos Genetics*. 2012;8 5:e1002697.
- 638 18. Huertasánchez E, Jin X, Bianba Z, Peter BM, Vinckenbosch N, Liang Y, et al. Altitude  
639 adaptation in Tibetans caused by introgression of Denisovan-like DNA. *Nature*.  
640 2014;512 7513:194-7.
- 641 19. Wu DD, Ding XD, Wang S, Wójcik JM, Zhang Y, Tokarska M, et al. Pervasive  
642 introgression facilitated domestication and adaptation in the *Bos* species complex.  
643 *Nature ecology & evolution*. 2018.
- 644 20. Ai H, Fang X, Yang B, Huang Z, Chen H, Mao L, et al. Adaptation and possible ancient  
645 interspecies introgression in pigs identified by whole-genome sequencing. *Nat Genet*.  
646 2015;47 3:217-25. doi:10.1038/ng.3199.
- 647 21. Rubin CJ, Megens HJ, Martinez Barrio A, Maqbool K, Sayyab S, Schwochow D, et al.  
648 Strong signatures of selection in the domestic pig genome. *Proc Natl Acad Sci U S A*.  
649 2012;109 48:19529-36. doi:10.1073/pnas.1217149109.
- 650 22. Frantz LA, Schraiber JG, Madsen O, Megens HJ, Cagan A, Bosse M, et al. Evidence  
651 of long-term gene flow and selection during domestication from analyses of Eurasian  
652 wild and domestic pig genomes. *Nature Genetics*. 2015;47 10:1141.
- 653 23. Sunjin M, Tae-Hun K, Kyung-Tai L, Woori K, Taeheon L, Si-Woo L, et al. A genome-  
654 wide scan for signatures of directional selection in domesticated pigs. *BMC*  
655 *Genomics*,16,1(2015-02-25). 2015;16 1:1-12.
- 656 24. Madsen P, Sørensen P, Su G, Damgaard LH, Thomsen H and Labouriau R. DMU - a  
657 package for analyzing multivariate mixed models. In: *Proceedings of the 8th World*  
658 *Congress on Genetics Applied to Livestock Production, Belo Horizonte, Minas Gerais,*  
659 *Brazil, 13-18 August, 2006* 2014, pp.27-11.

- 660 25. Shannon P, Markiel A, Ozier O, Baliga NS, Wang JT, Ramage D, et al. Cytoscape: A  
661 Software Environment for Integrated Models of Biomolecular Interaction Networks.  
662 Routledge; 2003.
- 663 26. Yang B, Cui L, Perez-Enciso M, Traspov A, Crooijmans R, Zinovieva N, et al.  
664 Genome-wide SNP data unveils the globalization of domesticated pigs. *Genet Sel Evol.*  
665 2017;49 1:71. doi:10.1186/s12711-017-0345-y.
- 666 27. Chang CC, Chow CC, Tellier LC, Vattikuti S, Purcell SM and Lee JJ. Second-  
667 generation PLINK: rising to the challenge of larger and richer datasets. *Gigascience.*  
668 2015;4:7. doi:10.1186/s13742-015-0047-8.
- 669 28. Ewing B and Green P. Base-calling of automated sequencer traces using phred. II. Error  
670 probabilities. *Genome Res.* 1998;8 3:186-94.
- 671 29. Li H and Durbin R. Fast and accurate short read alignment with Burrows-Wheeler  
672 transform. *Bioinformatics.* 2009;25 14:1754-60. doi:10.1093/bioinformatics/btp324.
- 673 30. Li H. A statistical framework for SNP calling, mutation discovery, association mapping  
674 and population genetical parameter estimation from sequencing data. *Bioinformatics.*  
675 2011;27 21:2987-93. doi:10.1093/bioinformatics/btr509.
- 676 31. Faust GG and Hall IM. SAMBLASTER: fast duplicate marking and structural variant  
677 read extraction. *Bioinformatics.* 2014;30 17:2503-5.  
678 doi:10.1093/bioinformatics/btu314.
- 679 32. McKenna A, Hanna M, Banks E, Sivachenko A, Cibulskis K, Kernytsky A, et al. The  
680 Genome Analysis Toolkit: a MapReduce framework for analyzing next-generation  
681 DNA sequencing data. *Genome Res.* 2010;20 9:1297-303. doi:10.1101/gr.107524.110.
- 682 33. Yang J, Lee SH, Goddard ME and Visscher PM. GCTA: a tool for genome-wide  
683 complex trait analysis. *Am J Hum Genet.* 2011;88 1:76-82.  
684 doi:10.1016/j.ajhg.2010.11.011.
- 685 34. Cummings MP. PHYLIP (phylogeny inference package). *Dictionary of Bioinformatics*  
686 *and Computational Biology.* 2004.
- 687 35. Weir BS and Cockerham CC. Estimating F-Statistics for the Analysis of Population  
688 Structure. *Evolution.* 1984;38 6:1358-70. doi:10.1111/j.1558-5646.1984.tb05657.x.
- 689 36. Alexander DH, Novembre J and Lange K. Fast model-based estimation of ancestry in  
690 unrelated individuals. *Genome Res.* 2009;19 9:1655-64. doi:10.1101/gr.094052.109.
- 691 37. Pickrell JK and Pritchard JK. Inference of population splits and mixtures from genome-  
692 wide allele frequency data. *PLoS Genet.* 2012;8 11:e1002967.  
693 doi:10.1371/journal.pgen.1002967.
- 694 38. Browning SR and Browning BL. Rapid and accurate haplotype phasing and missing-  
695 data inference for whole-genome association studies by use of localized haplotype  
696 clustering. *Am J Hum Genet.* 2007;81 5:1084-97. doi:10.1086/521987.
- 697 39. Browning BL and Browning SR. A fast, powerful method for detecting identity by  
698 descent. *Am J Hum Genet.* 2011;88 2:173-82. doi:10.1016/j.ajhg.2011.01.010.

- 699 40. Paradis E. pegas: an R package for population genetics with an integrated-modular  
700 approach. *Bioinformatics*. 2010;26 3:419-20. doi:10.1093/bioinformatics/btp696.
- 701 41. Price AL, Patterson NJ, Plenge RM, Weinblatt ME, Shadick NA and Reich D. Principal  
702 components analysis corrects for stratification in genome-wide association studies. *Nat*  
703 *Genet*. 2006;38 8:904-9. doi:10.1038/ng1847.
- 704 42. Voight BF, Kudravalli S, Wen X and Pritchard JK. A map of recent positive selection  
705 in the human genome. *PLoS Biol*. 2006;4 3:e72. doi:10.1371/journal.pbio.0040072.
- 706 43. Sabeti PC, Varilly P, Fry B, Lohmueller J, Hostetter E, Cotsapas C, et al. Genome-wide  
707 detection and characterization of positive selection in human populations. *Nature*.  
708 2007;449 7164:913-8. doi:10.1038/nature06250.
- 709 44. Szpiech ZA and Hernandez RD. selscan: An Efficient Multithreaded Program to  
710 Perform EHH-Based Scans for Positive Selection. *Molecular Biology & Evolution*.  
711 2014;31 10:2824-7.
- 712 45. Martin SH, Davey JW and Jiggins CD. Evaluating the use of ABBA-BABA statistics  
713 to locate introgressed loci. *Mol Biol Evol*. 2015;32 1:244-57.  
714 doi:10.1093/molbev/msu269.
- 715

716 **Figure Legends**

717 **Fig. 1. Population relationship and structure.** (a) Principal component analysis of Chinese  
718 and European pigs. ECN, East Chinese pigs; NCN, North Chinese pigs; SCN, South Chinese  
719 pigs; SWCN, Southwest Chinese pigs; EUD, European domestic pigs. (b) Neighbor-joining  
720 (NJ) tree based on an identity-by-state matrix among individuals. (c) NJ tree based on an Fst  
721 matrix between populations. (d) Population structure of Chinese and European pigs revealed  
722 by ADMIXTURE analysis. MIN, Min pigs; HT, Hetao pigs; LWH, Laiwu pigs; EHL,  
723 Erhualian pigs; MS, Meishan pigs; JH, Jinhua pigs; GST, Tibetan pigs (gansu); SCT, Tibetan  
724 pigs (Sichuan); YNT, Tibetan pigs (Yunnan); TT, Tibetan pigs (Tibet); WZS, Wuzhishan pigs;  
725 LUC, Luchuan pigs; BMX, Bamaxiang pigs; XIANG, Xiang pigs; AWB, Asian wild boars;  
726 OUT, outgroup; EWB, European wild boars; HMP, Hampshire; DU, Duroc; LR, Landrace; PI,  
727 Pietrain; WDU, White Duroc; WLW, Dutch Large White pigs; KLW, Korea Large White pigs;  
728 FLW, French Large White pigs.

729

730 **Fig. 2. Introgressed Chinese haplotypes in French Large White pigs.** (a) Manhattan plot of  
731 rIBD values between French Large White (FLW) and South Chinese (SCN) pigs (positive  
732 value) or European wild boars (EWB) (negative value). The red dashed line indicates the top  
733 5% significance threshold. (b) Manhattan plot of rIBD values between FLW and East Chinese  
734 (ECN) pigs (positive value) or EWB (negative value). (c) Venn diagram of introgressed DNA  
735 (50 Kb windows) from SCN and ECN pigs in FLW pigs. (d) Venn diagram of genes in the  
736 introgressed regions from SCN and ECN pigs in FLW pigs. (e) Significantly enriched GO  
737 processes and KEGG pathways of introgressed genes in the introgressed regions from SCN  
738 and ECN pigs under selection in FLW pigs.

739



740 **Fig. 3. Introgression at the *GOLMI-NAA35* locus.** (a) rIBD values in a 2 Mb region  
741 harboring the *GOLMI-NAA35* gene. The brown dashed line indicates the 5% threshold line,  
742 and the *GOLMI-NAA35* region is indicated by grey dashed lines. (b) Genetic differentiation  
743 index ( $F_{ST}$ ) between French Large White (FLW) and European wild boar (EWB) or South  
744 Chinese (SCN) pigs. (c) Haplotype heatmap in the *GOLMI-NAA35* region. Major and minor  
745 alleles in FLW pigs are indicated by beige and light blue, respectively. (d) Haplotype network  
746 in the *GOLMI-NAA35* region. Each circle represents a haplotype, and the size of the circle is  
747 proportional to the haplotype frequency. The line width and length represent the difference  
748 between haplotypes. Different colors represent pigs from different geographical regions.  
749 SWCN, Southwest Chinese pigs; NCN, North Chinese pigs; AWB, Asian (Chinese) wild boars;  
750 ECN, East Chinese pigs; EUD, European domestic pigs. (e) Selection signals in the *GOLMI-*  
751 *NAA35* region by XP-EHH analysis between FLW and other Large White pigs. The brown  
752 dashed line indicates the 5% threshold line. (f) Serum interleukin 6 (IL-6) contents of FLW  
753 pigs homozygous (QQ) or heterozygous (Qq) for the introgressed *GOLMI-NAA35* haplotypes.  
754 Student's *t*-test was employed to compute the *P*-value ( $P = 0.015$ ).

755

756 **Fig. 4. Introgression at the *KATNAL1* locus.** (a) rIBD values in a 2 Mb region encompassing  
757 the *KATNAL1* gene. The brown dashed line indicates the 5% threshold line, and the *KATNAL1*  
758 region is indicated by grey dashed lines. (b) Genetic differentiation index ( $F_{ST}$ ) between French  
759 Large White (FLW) and European wild boar (EWB) or East Chinese (ECN) pigs. (c) Haplotype  
760 heatmap of the *KATNAL1* region. Major and minor alleles in FLW pigs are indicated by beige  
761 and light blue, respectively. (d) Haplotype network in the *KATNAL1* region. The legend is the  
762 same as in Figure 3. (e) Selection signals by XP-EHH analysis between FLW and other Large  
763 White pigs. The brown dashed line indicates the 5% threshold line. (f) Estimated breeding  
764 values for total number of piglets born (TNB EBV) of FLW sows that mated with FLW boars

765 homozygous (QQ) or heterozygous (Qq) for the introgressed haplotypes. Student's *t*-test was  
766 employed to compute the *P*-value ( $P = 0.036$ ).

767

768 **Fig. 5. Archaic introgression at the *AHR* locus.** (a) Haplotype heatmap of a 180 kb region  
769 on chromosome 9 (SSC9: 95.5 - 95.65 Mb on Sscrofa10.2 and 86.47 - 86.65 Mb on  
770 Sscrofa11.1). The *AHR* region is indicated by a red box. Major and minor alleles in FLW pigs  
771 are indicated by beige and light blue, respectively. (b) *AHR* haplotype network. Each pie chart  
772 represents one unique haplotype, and the radius of the pie chart is proportional to the five times  
773 of  $\log_{10}$  (number of chromosomes with that haplotype). The width and length of the edges  
774 are proportional to the  $\log_2$  (number of pairwise differences between the joined haplotypes)  
775 plus one, and the thinnest edge represents a difference of one mutation. Three different  
776 background colors represent the three different haplotype groups. Different colors represent  
777 pigs from different geographical regions. The full names of pig codes are given in the legend  
778 of Figure 3. (c) Haplotype difference between each *AHR* haplotype. (d) Distribution of the  
779 potential archaic SNPs. At these SNPs, the frequency difference between Erhualian and  
780 Chinese wild boars was greater than 0.45, and that between Erhualian pigs and outgroup  
781 animals was less than 0.1. The x-axis shows the ratio of the potential archaic SNPs in each 50  
782 kb window, and the y-axis indicates the number of windows. The red line marks the ratio of  
783 the potential archaic SNPs in the window harboring the *AHR* gene. (e) Distribution of gene  
784 flow ( $f_D$ ) and nucleotide distance ( $D_{xy}$ ) statistics within nonoverlapping 50 kb windows across  
785 the genome.  $D_{xy}$  values between Erhualian pigs and Chinese wild boars are shown in the x-  
786 axis and  $f_D$  in the y-axis. The red dot, an extreme outlier, represents the window in which the  
787 *AHR* gene is located. (f) French Large White sows carrying the homozygous archaic *AHR*  
788 haplotype show significantly ( $P = 2.39 \times 10^{-5}$ ) lower estimated breeding values for total number  
789 born EBV (TNB\_EBV), compared with those who do not carry the archaic haplotype. (g)

790 Erhualian sows homozygously carrying the archaic haplotype (QQ) have higher ( $P = 0.0096$ )  
791 TNB\_EBV than heterozygous carriers (qq).

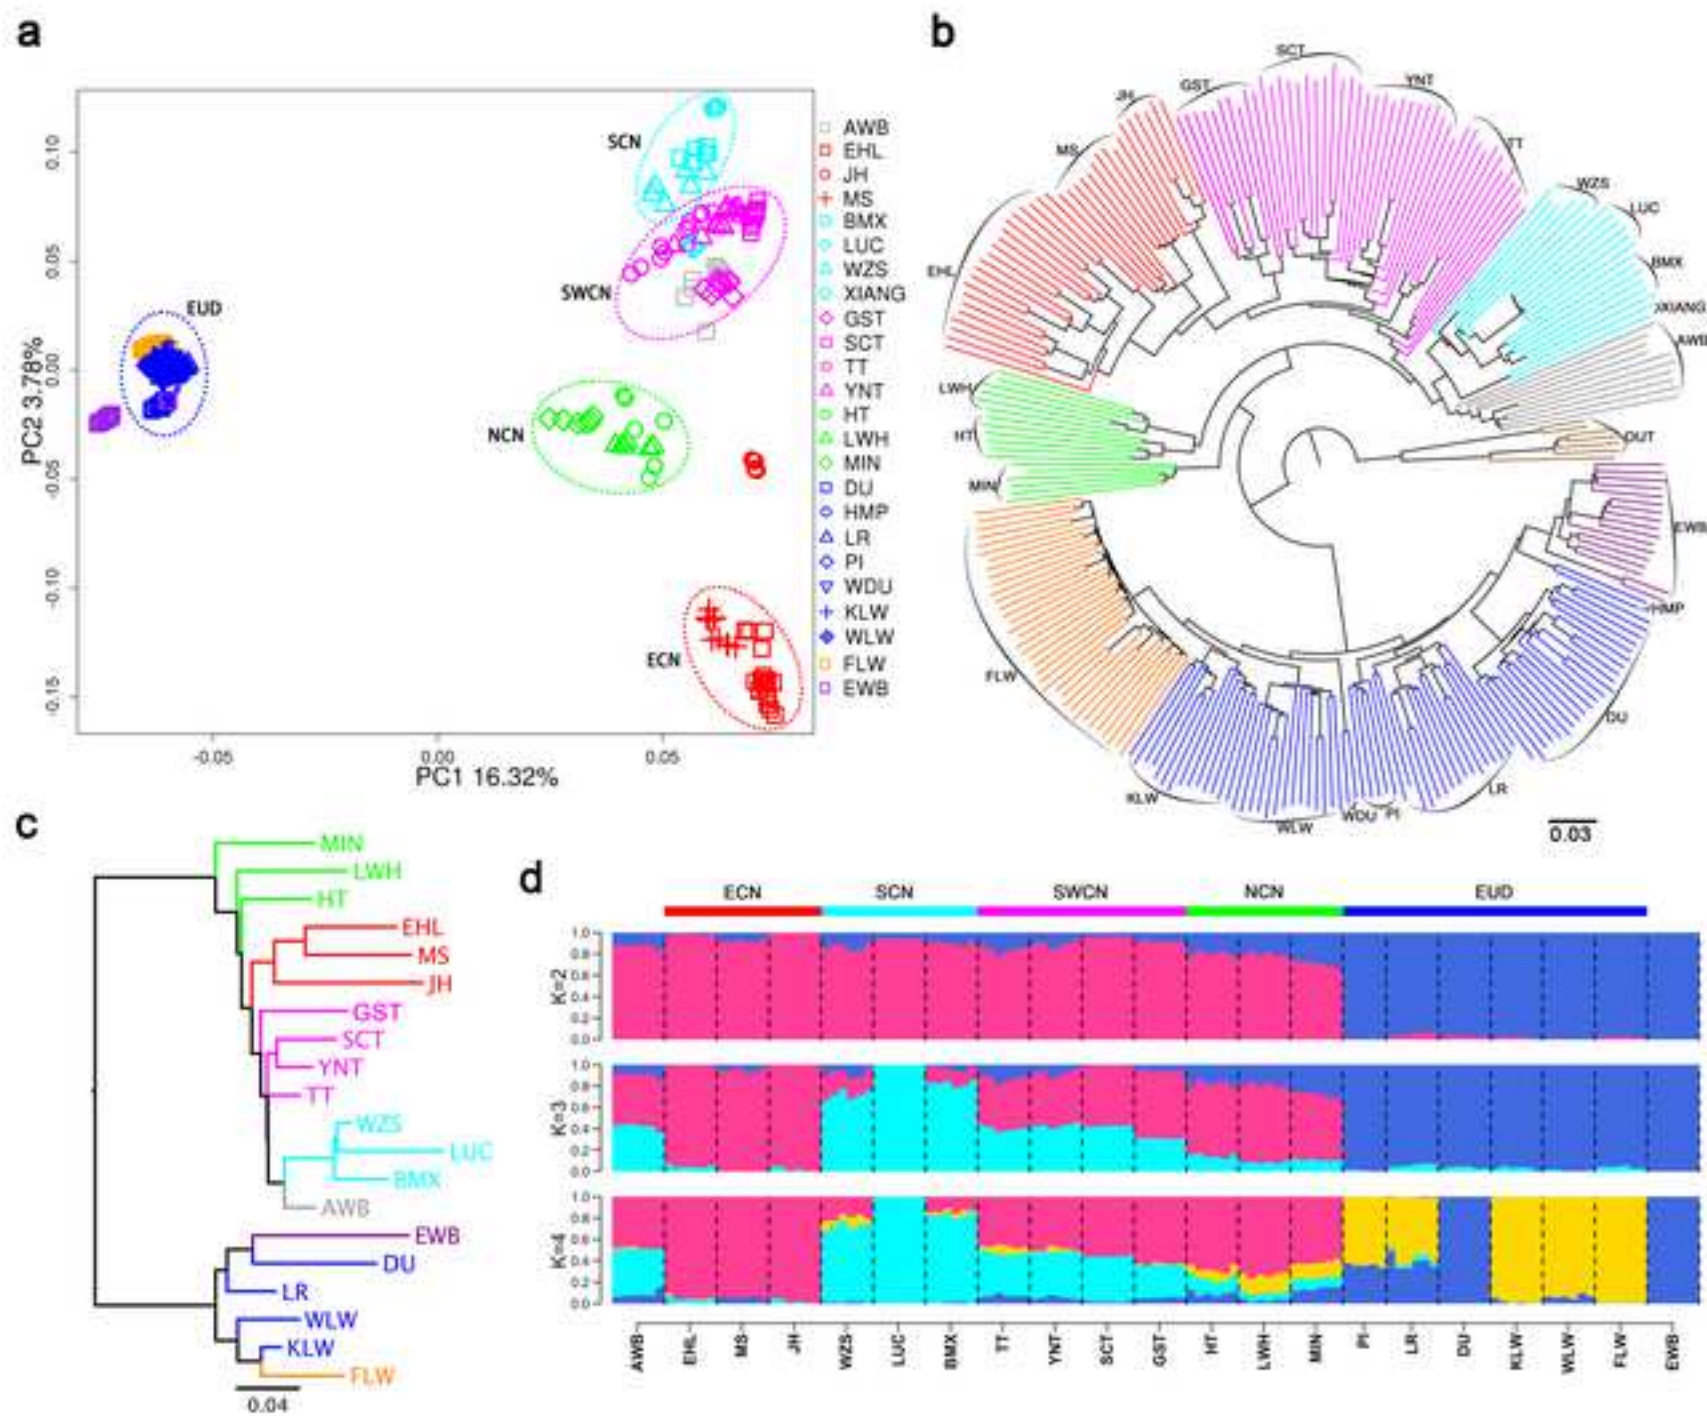

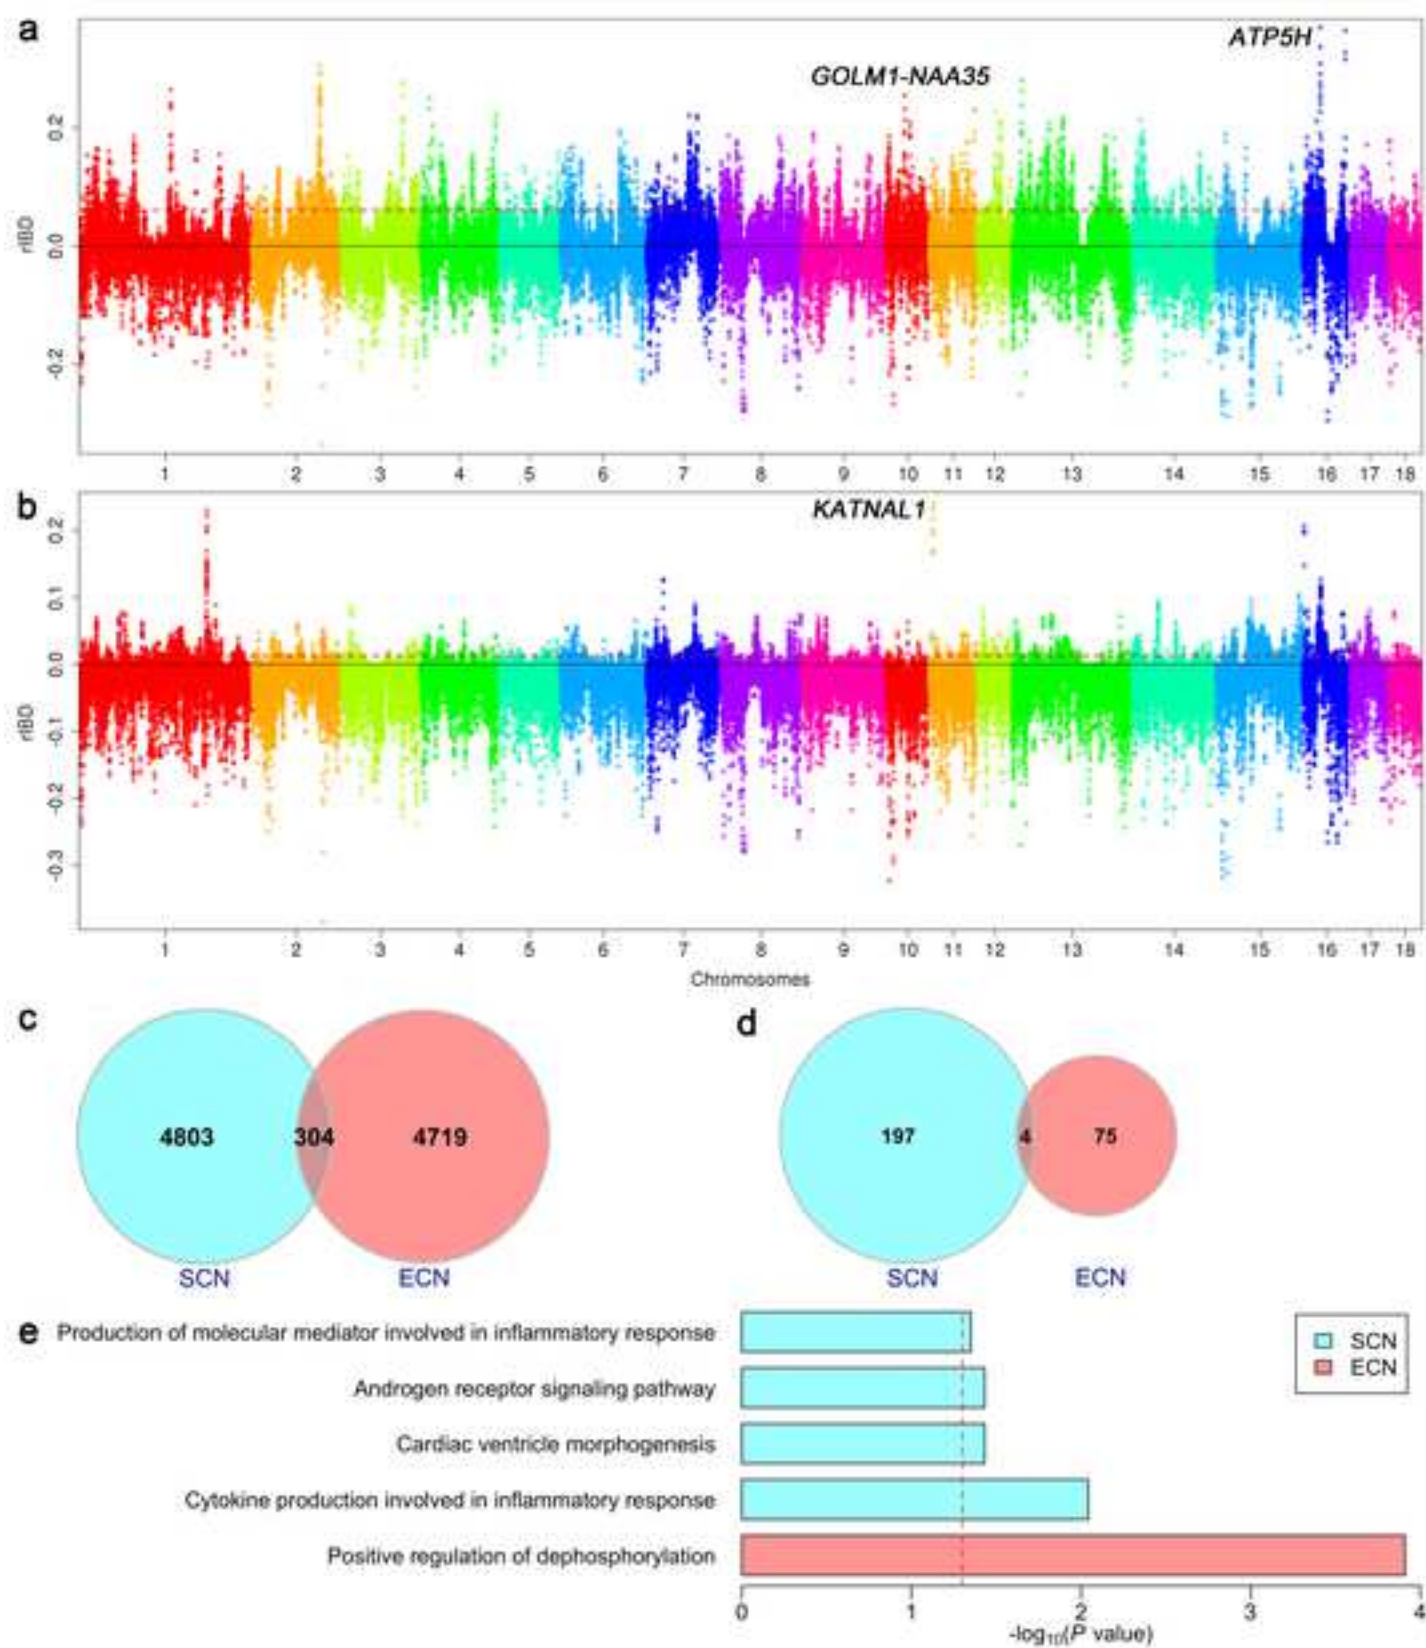



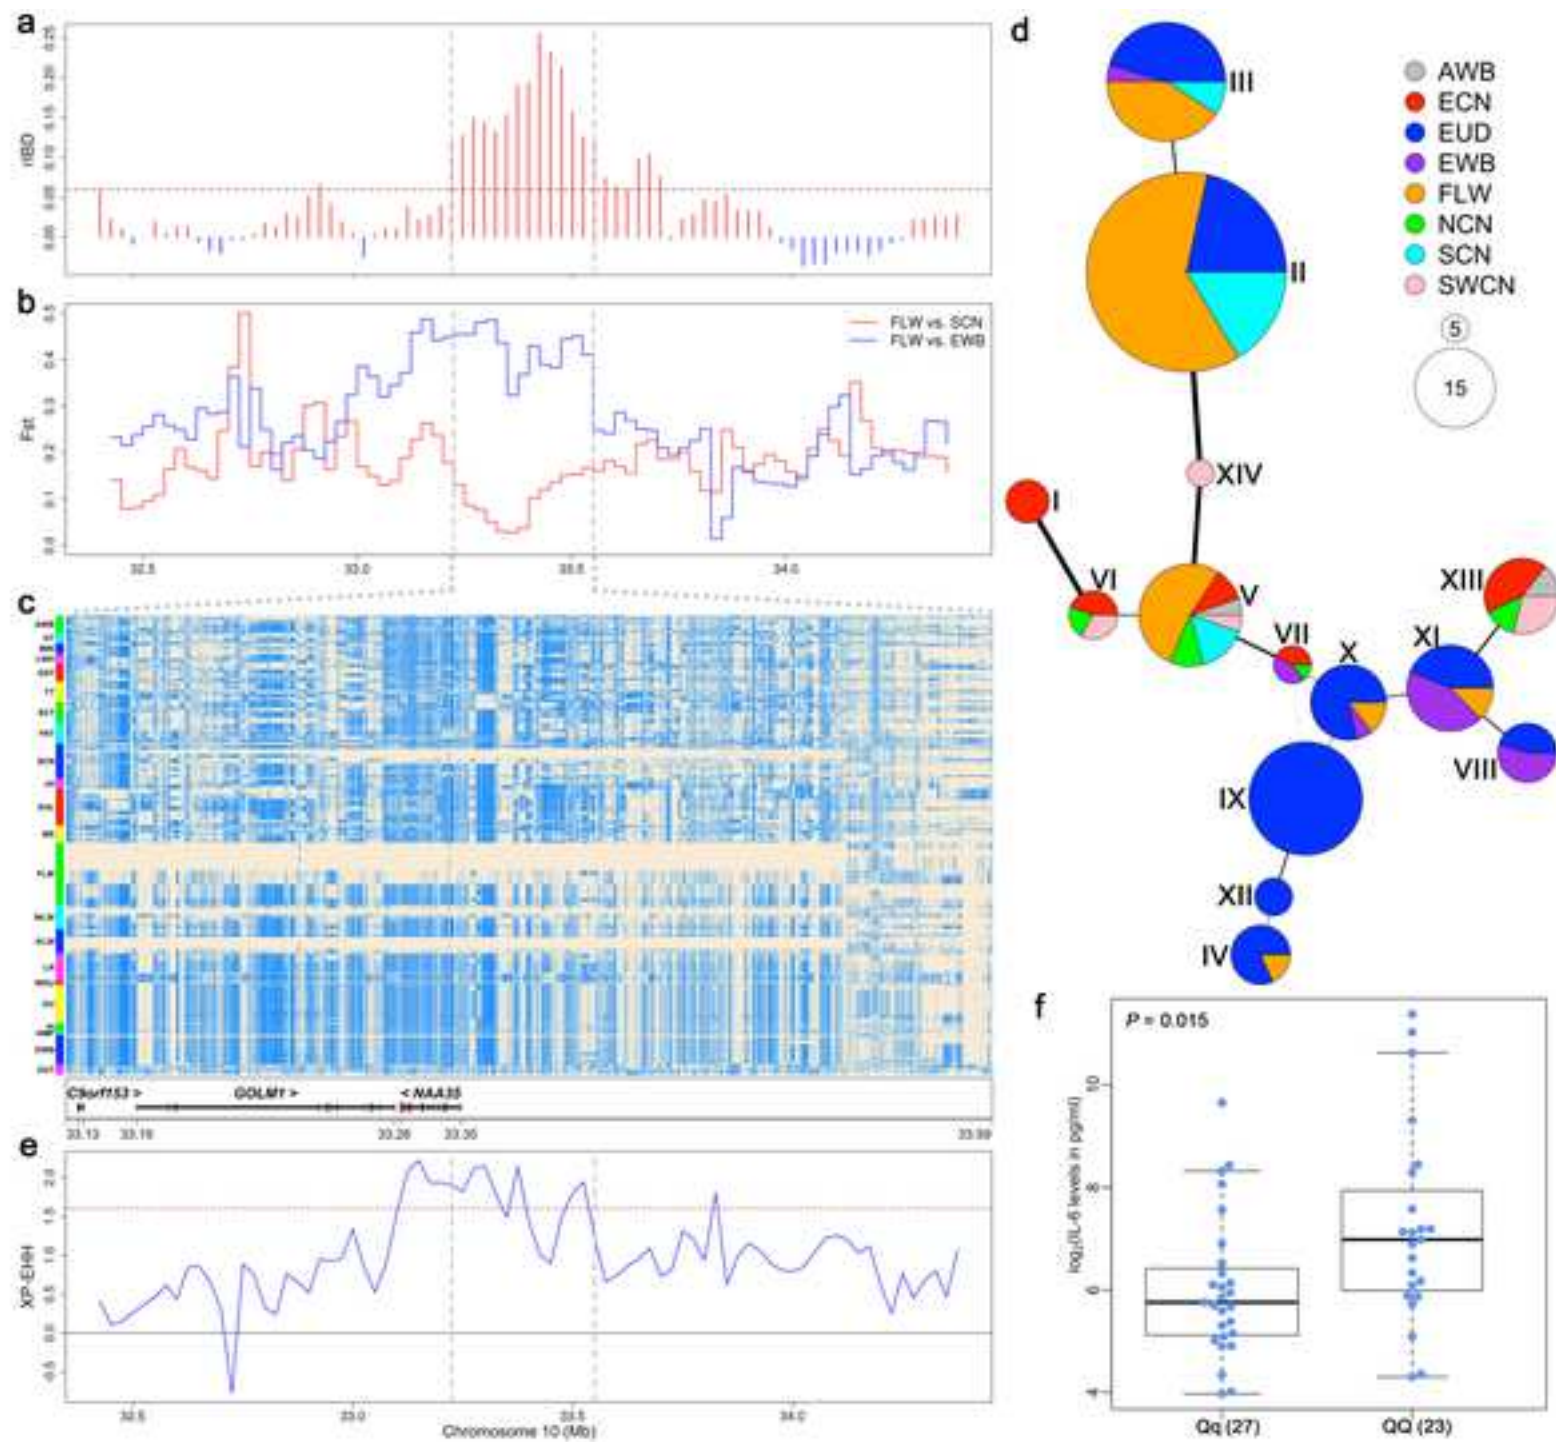

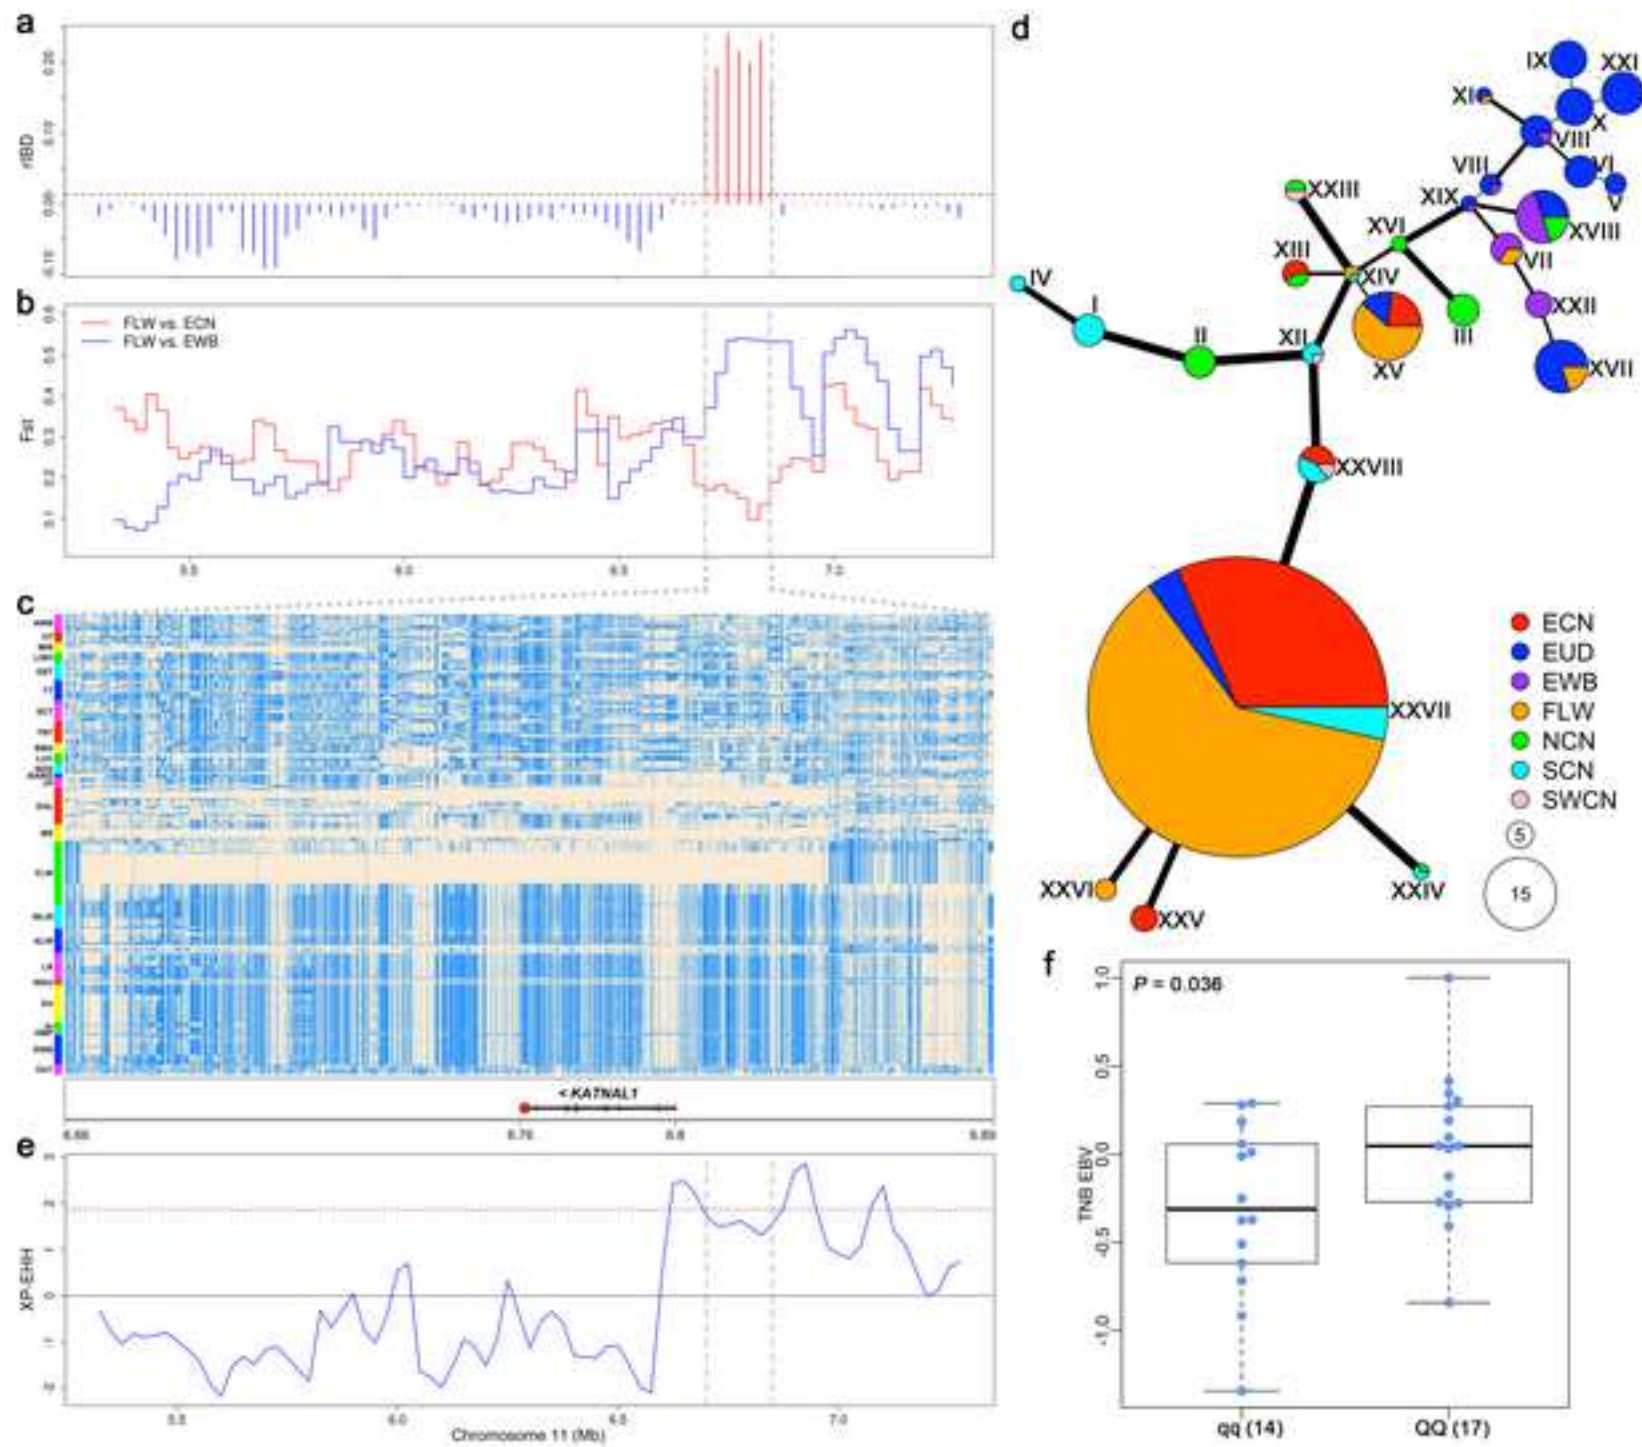







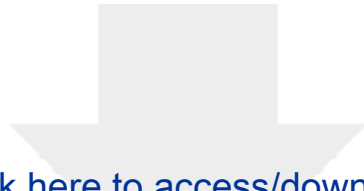

Click here to access/download  
**Supplementary Material**  
Supplementary Information.docx

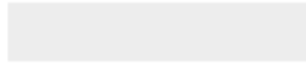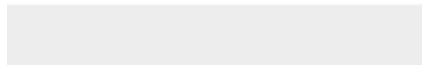



Click here to access/download  
**Supplementary Material**  
Table S2.xlsx



Click here to access/download  
**Supplementary Material**  
Table S3.xlsx

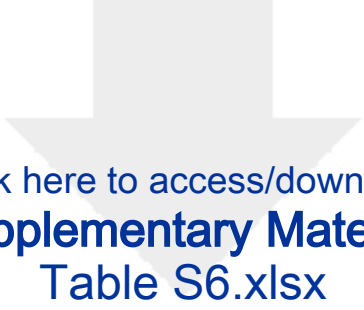

Click here to access/download  
**Supplementary Material**  
Table S6.xlsx



Click here to access/download  
**Supplementary Material**  
Table S7.xlsx
